# Supplementary material for: Digital outcome measures from smartwatch data relate to non-motor features of Parkinson’s disease
Source: Springer Nature journal article supplement (doi:10.1038/s41531-024-00719-w), 2024-05-29
Supplement: MOESM1 [file 41531_2024_719_MOESM1_ESM.pdf]

## Supplemental Material

### Digital monthly averages

Instead of using a 3.5-day window around the clinic visit, we also evaluated a 30-day window. Due to the large, considered timeframe, more subjects and more visits were overlapping with digital data collection (N=116). Missingness was thus also further increased (84.1% - 99.53%). The monthly digital averages correlated with the clinical measures, revealing a similar pattern as the weekly digital averages (Supplemental Figure 1). Due to the increased sample size and thus power, more associations reached statistical significance at 0.05 FDR correction. Of note, two additional cognitive measures were associated with step count (Semantic Fluency, HVLT Recall). Again, half of the cognitive measures related to sleep measures. In this analysis, new associations with vital signs were revealed for Semantic Fluency and QUIP. Associations for ESS, UPDRS IV, and SCOPA autonome were not identified here. For the rate of change analysis, HVTL recall remained the most sensitive to change (Cohen's  $d = 0.5$ ). Digital sleep measures remained the most sensitive digital ones and overall digital measures had slightly higher, but not significantly, sensitivity to change (clinical: 0.16, digital: 0.19,  $p$ -value = 0.41). Contrary to the digital weekly averages, the difference of the monthly averages did show associations with the difference between clinic visits (Supplemental Figure 3). Increases in UPDRS II related to decreases in light NREM sleep time, increases in UPDRS III ON related to increases in mean pulse rate, and increases in UPDRS IV related to decreases in walking minutes. Findings for this monthly analysis that were not significant in the weekly one, can again be attributed to the bigger sample size (mean N=26 vs mean N=10).

## Supplemental Figure 1: Associations between digital monthly averages and clinical assessments

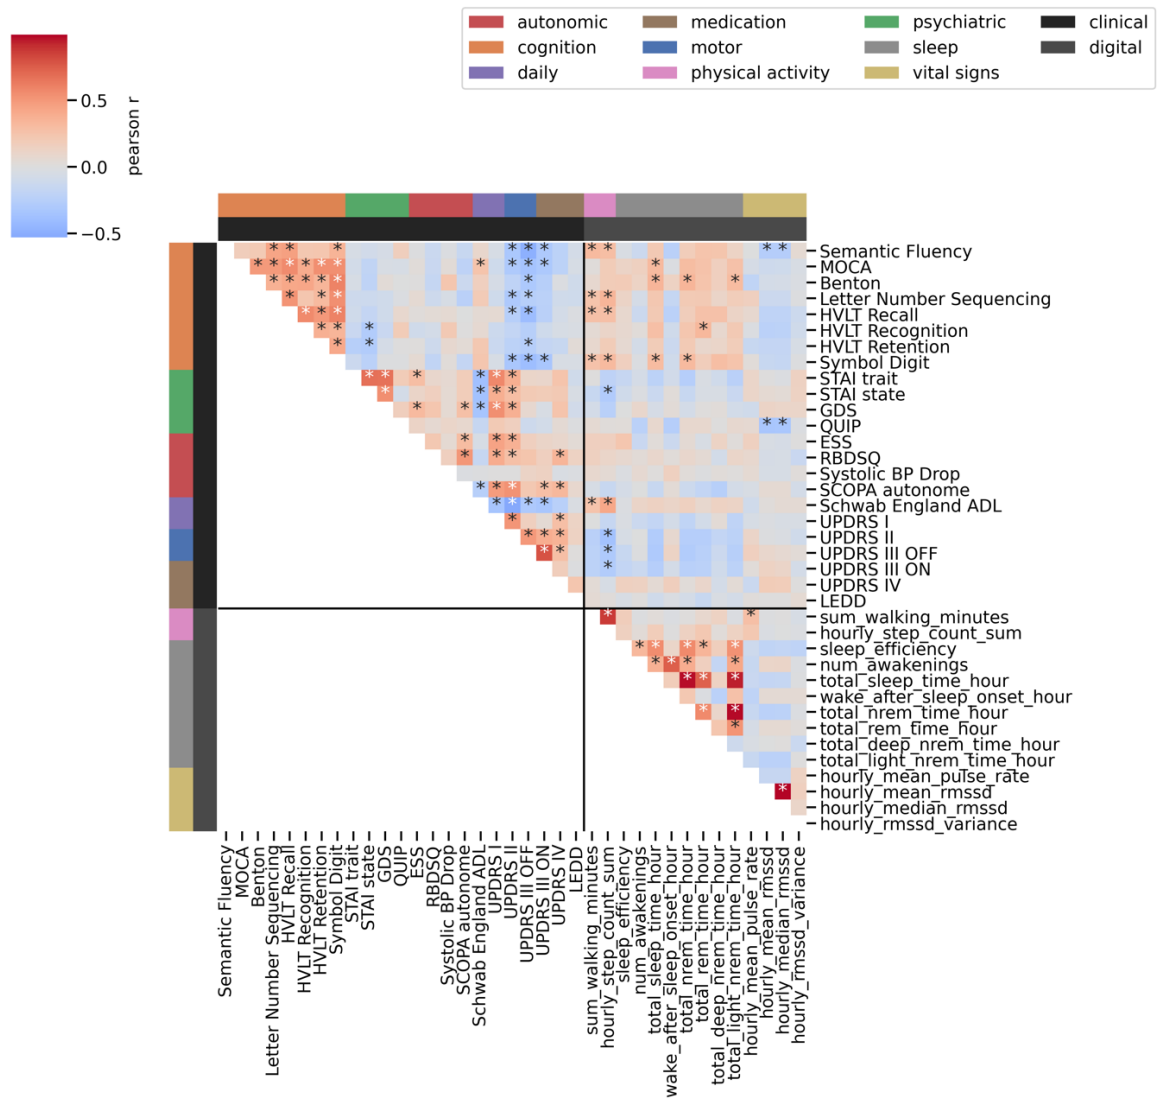

The heatmap displays the Pearson's  $r$  coefficient for each digital monthly average and clinical assessment in the Parkinson's disease group. If multiple visits overlapped with the digital data per person, the last visit to the clinic was chosen. Individual tests are grouped into modalities as indicated by the colours on the left and top. Asterisks indicate significant correlation after 0.05 FDR correction.

## Supplemental Figure 2: Difference between visits is not related between digital weekly averages and clinical measures

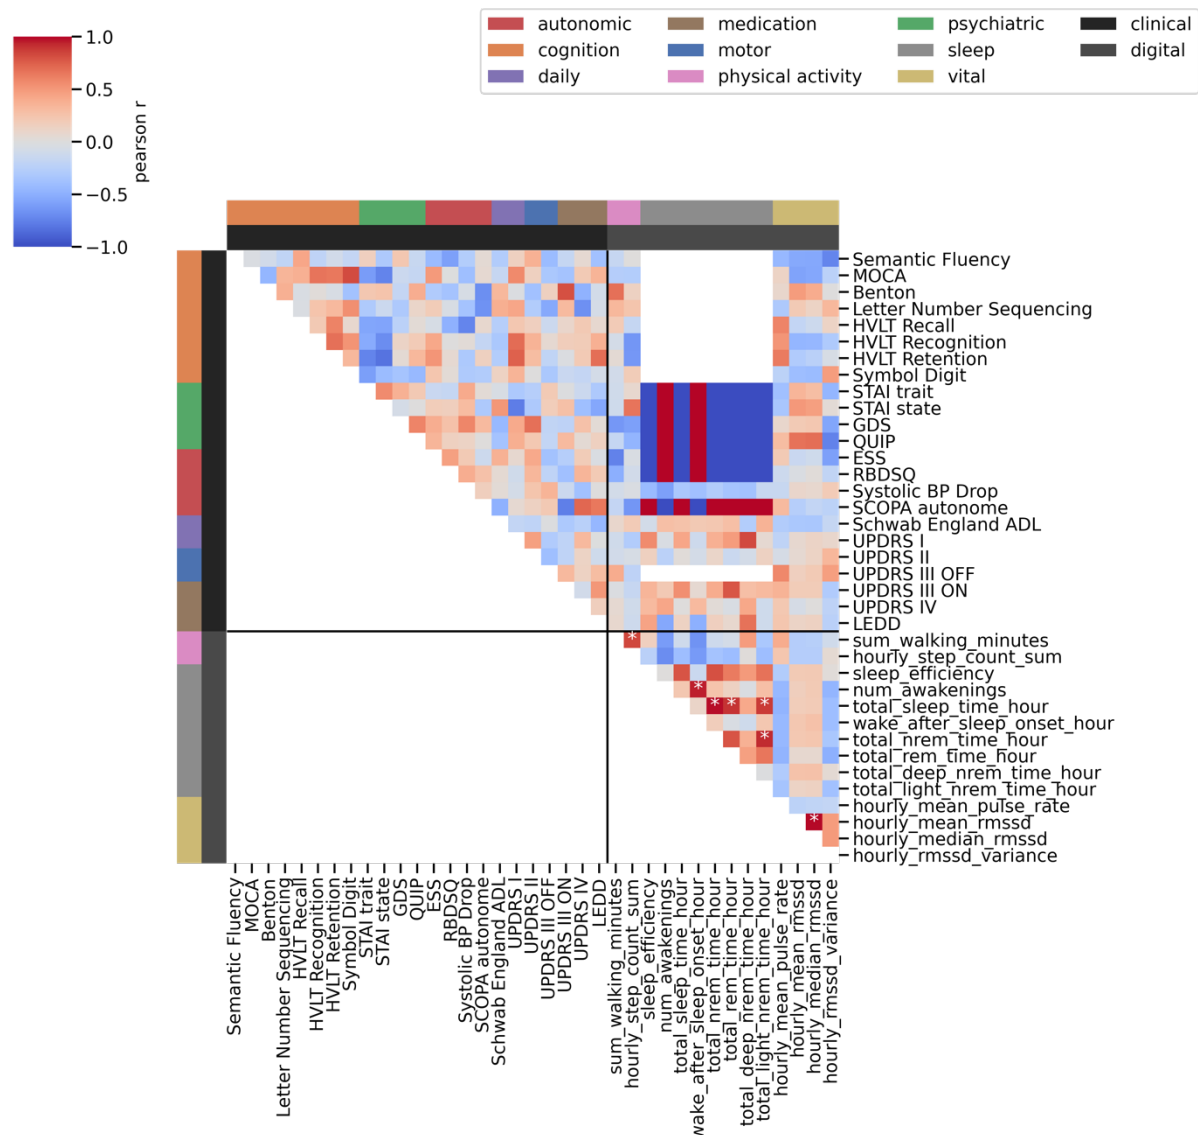

The heatmap displays for every combination of digital and clinical measures the correlation between the mean rate of change over time. The domains can be seen on the left and top coded by the colour bars. The colour indicates the Pearson r coefficient and an asterisk indicates 0.05 FDR corrected significance.

ESS: Epworth Sleepiness Scale, RBDSQ: REM behavioral sleep disorder screening questionnaire, BP: blood pressure, SCOPA: Scale for Outcomes in Parkinson's disease for Autonomic Symptoms, MOCA: Montreal Cognitive Assessment, HVLT: Hopkins Verbal Learning Test, STAI: state-trait anxiety index, GDS: Geriatric Depression Scale, QUIP: Impulsive-Compulsive Disorders in PD, ADL: activities of daily living, UPDRS: Universal Parkinson's Disease Rating Scale, LEDD: Levodopa equivalent daily dosage, RMSSD: mean root mean squared successive differences

### Supplemental Figure 3: Difference between visits is not related between digital monthly averages and clinical measures

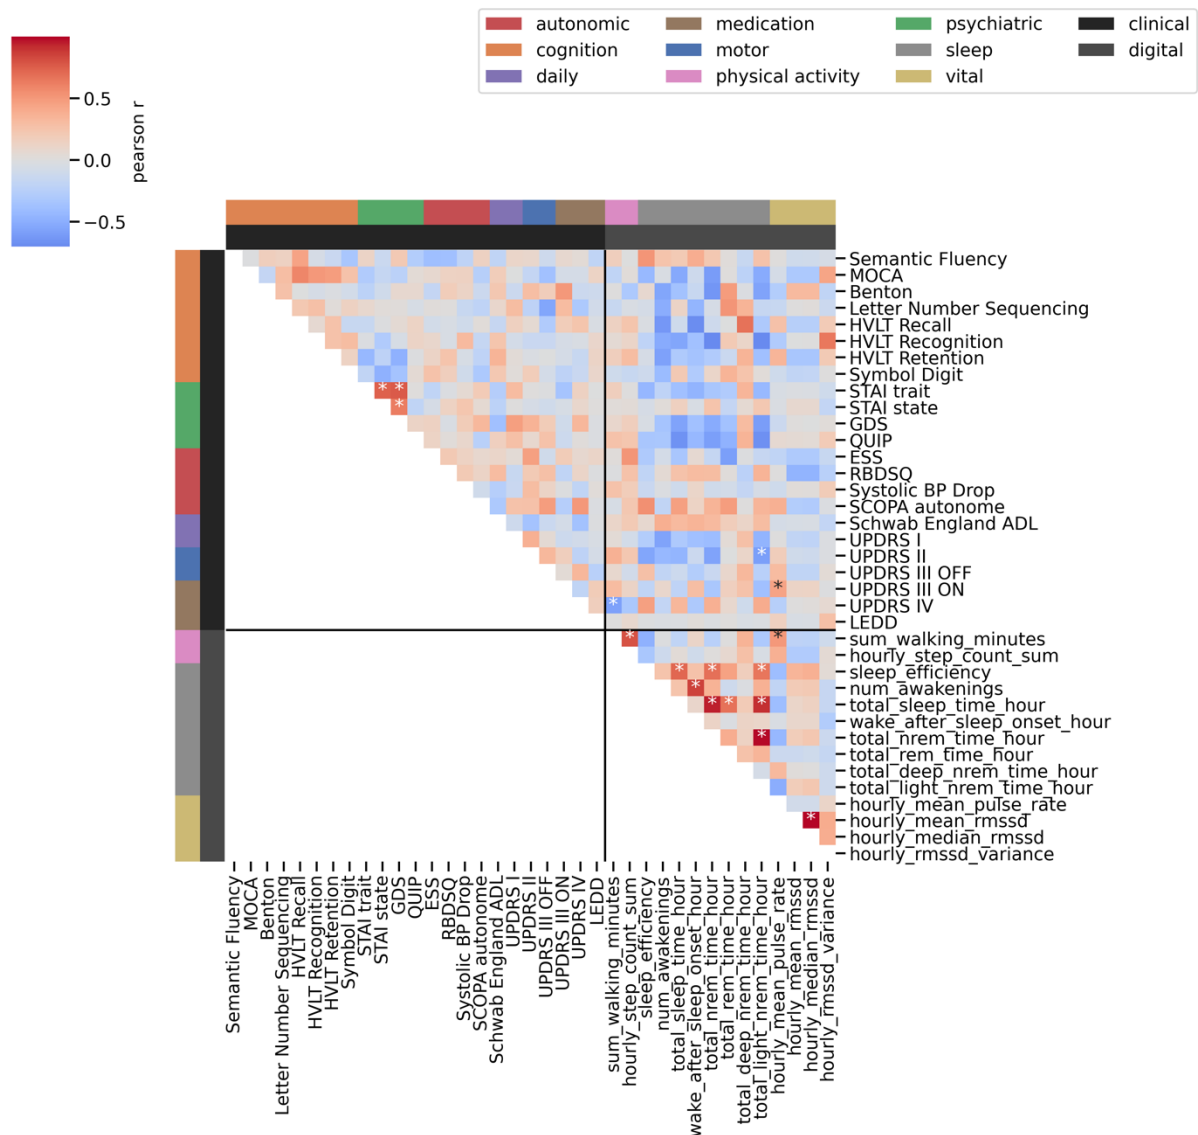

The heatmap displays for every combination of digital and clinical measures the correlation between the mean rate of change over time. The domains can be seen on the left and top coded by the colour bars. The colour indicates the Pearson r coefficient and an asterisk indicates 0.05 FDR corrected significance.

ESS: Epworth Sleepiness Scale, RBDSQ: REM behavioral sleep disorder screening questionnaire, BP: blood pressure, SCOPA: Scale for Outcomes in Parkinson's disease for Autonomic Symptoms, MOCA: Montreal Cognitive Assessment, HVLt: Hopkins Verbal Learning Test, STAI: state-trait anxiety index, GDS: Geriatric Depression Scale, QUIP: Impulsive-Compulsive Disorders in PD, ADL: activities

of daily living, UPDRS: Universal Parkinson's Disease Rating Scale, LEDD: Levodopa equivalent daily dosage, RMSSD: mean root mean squared successive differences

### Supplemental Figure 4: Monthly digital outcome measures fail to predict clinical scores

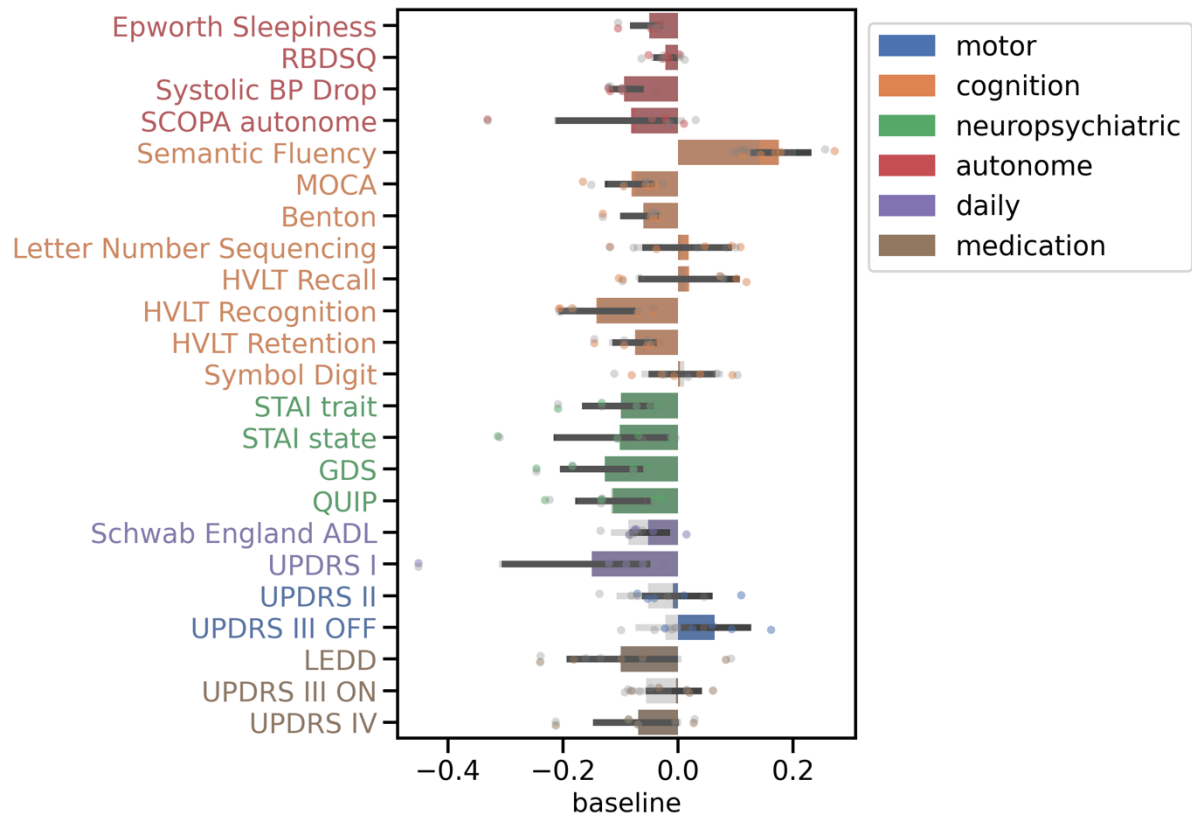

The predictive performance (x-axis) of the 14 monthly digital averages (step count, walking minutes, NREM sleep time, deep NREM sleep time, light NREM sleep time, REM sleep time, sleep efficiency, number of awakenings, wake after sleep onset, total sleep time, mean pulse rate, mean RMSSD, median RMSSD, RMSSD variance) for each clinical measure (y-axis) as the mean R2 across the five outer cross-validation test sets with their 95% Confidence Interval. The grey bars show the respective baseline performance also with 95% CI. The dots display the individual data points. An asterisk indicates significant improvement over baseline at 0.05 significance (two-sided t-test with N=5). The colour indicates the domain of the clinical measure.

ESS: Epworth Sleepiness Scale, RBDSQ: REM behavioral sleep disorder screening questionnaire, BP: blood pressure, SCOPA: Scale for Outcomes in Parkinson's disease for Autonomic Symptoms,

MOCA: Montreal Cognitive Assessment, HVL: Hopkins Verbal Learning Test, STAI: state-trait anxiety index, GDS: Geriatric Depression Scale, QUIP: Impulsive-Compulsive Disorders in PD, ADL: activities of daily living, UPDRS: Universal Parkinson's Disease Rating Scale, LEDD: Levodopa equivalent daily dosage, RMSSD: mean root mean squared successive differences

### Supplemental Table 1: Missingness of digital data

The percentage of missing data is shown for each digital outcome measure around the clinic visit. Missingness was computed as the difference to the expected hourly data rate for six days (24\*6).

|                             | count | mean     |
|-----------------------------|-------|----------|
| sum_walking_minutes         | 134   | 78.36339 |
| hourly_step_count_sum       | 129   | 78.04156 |
| sleep_efficiency            | 53    | 98.84696 |
| num_awakenings              | 53    | 98.84696 |
| total_sleep_time_hour       | 53    | 98.84696 |
| wake_after_sleep_onset_hour | 53    | 98.84696 |
| total_nrem_time_hour        | 53    | 98.84696 |
| total_rem_time_hour         | 53    | 98.84696 |
| total_deep_nrem_time_hour   | 53    | 98.84696 |
| total_light_nrem_time_hour  | 53    | 98.84696 |
| hourly_mean_pulse_rate      | 129   | 78.07386 |
| hourly_mean_rmssd           | 127   | 89.37008 |
| hourly_median_rmssd         | 127   | 89.37008 |
| hourly_rmssd_variance       | 123   | 92.46838 |

### Supplemental Table 2: Association between digital weekly averages and clinical assessments

Results of the Pearson correlation analysis between clinical and digital markers. The Pearson's r coefficient, the associated p-value, the FDR corrected p-value, and the sample size is displayed.

| f1               | f2                       | N  | pearson r | p-value  | p-corrected FDR | sign |
|------------------|--------------------------|----|-----------|----------|-----------------|------|
| Semantic Fluency | MOCA                     | 73 | 0.202439  | 0.085865 | 0.259126        |      |
| Semantic Fluency | Benton                   | 74 | 0.226843  | 0.051947 | 0.177419        |      |
| Semantic Fluency | Letter Number Sequencing | 74 | 0.334697  | 0.00356  | 0.031197        | *    |
| Semantic Fluency | HVLT Recall              | 74 | 0.447504  | 6.4E-05  | 0.001184        | *    |
| Semantic Fluency | HVLT Recognition         | 73 | 0.116517  | 0.326254 | 0.602213        |      |
| Semantic Fluency | HVLT Retention           | 74 | 0.187127  | 0.110387 | 0.30997         |      |

|                  |                             |    |          |          |          |   |
|------------------|-----------------------------|----|----------|----------|----------|---|
| Semantic Fluency | Symbol Digit                | 74 | 0.365282 | 0.001374 | 0.014521 | * |
| Semantic Fluency | STAI trait                  | 74 | -0.03545 | 0.764284 | 0.883703 |   |
| Semantic Fluency | STAI state                  | 74 | -0.08188 | 0.488    | 0.742027 |   |
| Semantic Fluency | GDS                         | 74 | -0.04069 | 0.73068  | 0.870542 |   |
| Semantic Fluency | QUIP                        | 74 | 0.214516 | 0.066453 | 0.215893 |   |
| Semantic Fluency | ESS                         | 74 | -0.01767 | 0.881224 | 0.93745  |   |
| Semantic Fluency | RBDSQ                       | 74 | -0.1761  | 0.133404 | 0.356815 |   |
| Semantic Fluency | Systolic BP Drop            | 74 | -0.17757 | 0.13013  | 0.350877 |   |
| Semantic Fluency | SCOPA autonome              | 74 | -0.15421 | 0.18958  | 0.464191 |   |
| Semantic Fluency | Schwab England ADL          | 74 | 0.113899 | 0.333914 | 0.605958 |   |
| Semantic Fluency | UPDRS I                     | 74 | 0.009577 | 0.935457 | 0.963872 |   |
| Semantic Fluency | UPDRS II                    | 74 | -0.33247 | 0.003802 | 0.032888 | * |
| Semantic Fluency | UPDRS III OFF               | 70 | -0.43623 | 0.00016  | 0.002599 | * |
| Semantic Fluency | UPDRS III ON                | 71 | -0.36678 | 0.001655 | 0.017218 | * |
| Semantic Fluency | UPDRS IV                    | 72 | -0.23568 | 0.046263 | 0.163888 |   |
| Semantic Fluency | LEDD                        | 74 | -0.05633 | 0.633583 | 0.825766 |   |
| Semantic Fluency | sum_walking_minutes         | 74 | 0.285853 | 0.013553 | 0.075223 |   |
| Semantic Fluency | hourly_step_count_sum       | 74 | 0.258508 | 0.026158 | 0.110963 |   |
| Semantic Fluency | sleep_efficiency            | 32 | 0.063703 | 0.729064 | 0.870173 |   |
| Semantic Fluency | num_awakenings              | 32 | -0.09285 | 0.613266 | 0.811434 |   |
| Semantic Fluency | total_sleep_time_hour       | 32 | 0.290323 | 0.106981 | 0.304485 |   |
| Semantic Fluency | wake_after_sleep_onset_hour | 32 | -0.38001 | 0.031925 | 0.128086 |   |
| Semantic Fluency | total_nrem_time_hour        | 32 | 0.294865 | 0.101359 | 0.293499 |   |
| Semantic Fluency | total_rem_time_hour         | 32 | 0.198315 | 0.276569 | 0.549034 |   |
| Semantic Fluency | total_deep_nrem_time_hour   | 32 | 0.397034 | 0.024449 | 0.106997 |   |
| Semantic Fluency | total_light_nrem_time_hour  | 32 | 0.199179 | 0.274441 | 0.549034 |   |
| Semantic Fluency | hourly_mean_pulse_rate      | 74 | 0.06295  | 0.594153 | 0.810625 |   |
| Semantic Fluency | hourly_mean_rmssd           | 73 | -0.12548 | 0.290163 | 0.566712 |   |
| Semantic Fluency | hourly_median_rmssd         | 73 | -0.12449 | 0.294022 | 0.568101 |   |
| Semantic Fluency | hourly_rmssd_variance       | 72 | 0.11687  | 0.328233 | 0.602213 |   |
| MOCA             | Benton                      | 73 | 0.451103 | 6.19E-05 | 0.001178 | * |
| MOCA             | Letter Number Sequencing    | 73 | 0.529279 | 1.48E-06 | 4.94E-05 | * |
| MOCA             | HVLT Recall                 | 73 | 0.525734 | 1.79E-06 | 5.41E-05 | * |
| MOCA             | HVLT Recognition            | 72 | 0.255907 | 0.030029 | 0.123451 |   |
| MOCA             | HVLT Retention              | 73 | 0.54988  | 4.68E-07 | 2.08E-05 | * |
| MOCA             | Symbol Digit                | 73 | 0.506274 | 4.89E-06 | 0.000116 | * |
| MOCA             | STAI trait                  | 73 | -0.11881 | 0.316768 | 0.594274 |   |
| MOCA             | STAI state                  | 73 | -0.21553 | 0.067059 | 0.216803 |   |
| MOCA             | GDS                         | 73 | -0.00294 | 0.980292 | 0.986679 |   |
| MOCA             | QUIP                        | 73 | -0.10752 | 0.365245 | 0.633471 |   |
| MOCA             | ESS                         | 73 | 0.045069 | 0.704975 | 0.859134 |   |
| MOCA             | RBDSQ                       | 73 | -0.0932  | 0.432904 | 0.704924 |   |
| MOCA             | Systolic BP Drop            | 73 | -0.3264  | 0.004829 | 0.037837 | * |
| MOCA             | SCOPA autonome              | 73 | -0.13545 | 0.253216 | 0.533677 |   |
| MOCA             | Schwab England ADL          | 73 | 0.150944 | 0.202407 | 0.47836  |   |
| MOCA             | UPDRS I                     | 73 | -0.06486 | 0.585655 | 0.803773 |   |

|        |                             |    |          |          |          |   |
|--------|-----------------------------|----|----------|----------|----------|---|
| MOCA   | UPDRS II                    | 73 | -0.28795 | 0.0135   | 0.075223 |   |
| MOCA   | UPDRS III OFF               | 69 | -0.36741 | 0.001899 | 0.019161 | * |
| MOCA   | UPDRS III ON                | 70 | -0.33822 | 0.004187 | 0.034424 | * |
| MOCA   | UPDRS IV                    | 71 | -0.24618 | 0.038503 | 0.14653  |   |
| MOCA   | LEDD                        | 73 | -0.04741 | 0.69043  | 0.849525 |   |
| MOCA   | sum_walking_minutes         | 73 | 0.080828 | 0.49664  | 0.751733 |   |
| MOCA   | hourly_step_count_sum       | 73 | 0.229165 | 0.051149 | 0.176908 |   |
| MOCA   | sleep_efficiency            | 32 | 0.328721 | 0.066214 | 0.215893 |   |
| MOCA   | num_awakenings              | 32 | 0.079887 | 0.663835 | 0.843729 |   |
| MOCA   | total_sleep_time_hour       | 32 | 0.575949 | 0.000562 | 0.007637 | * |
| MOCA   | wake_after_sleep_onset_hour | 32 | -0.4072  | 0.020719 | 0.095826 |   |
| MOCA   | total_nrem_time_hour        | 32 | 0.558915 | 0.000884 | 0.010329 | * |
| MOCA   | total_rem_time_hour         | 32 | 0.455513 | 0.008797 | 0.05744  |   |
| MOCA   | total_deep_nrem_time_hour   | 32 | 0.165725 | 0.364684 | 0.633471 |   |
| MOCA   | total_light_nrem_time_hour  | 32 | 0.548928 | 0.00114  | 0.012451 | * |
| MOCA   | hourly_mean_pulse_rate      | 73 | -0.05785 | 0.626876 | 0.820235 |   |
| MOCA   | hourly_mean_rmssd           | 72 | -0.08677 | 0.468625 | 0.729716 |   |
| MOCA   | hourly_median_rmssd         | 72 | -0.0667  | 0.577717 | 0.799916 |   |
| MOCA   | hourly_rmssd_variance       | 71 | -0.06295 | 0.60197  | 0.811434 |   |
| Benton | Letter Number Sequencing    | 74 | 0.388036 | 0.000635 | 0.008137 | * |
| Benton | HVLT Recall                 | 74 | 0.329893 | 0.0041   | 0.034424 | * |
| Benton | HVLT Recognition            | 73 | 0.263101 | 0.024518 | 0.106997 |   |
| Benton | HVLT Retention              | 74 | 0.285298 | 0.013744 | 0.07565  |   |
| Benton | Symbol Digit                | 74 | 0.593503 | 2.51E-08 | 1.85E-06 | * |
| Benton | STAI trait                  | 74 | 0.029102 | 0.805577 | 0.890844 |   |
| Benton | STAI state                  | 74 | -0.15045 | 0.200726 | 0.47836  |   |
| Benton | GDS                         | 74 | 0.121335 | 0.303101 | 0.580073 |   |
| Benton | QUIP                        | 74 | -0.03067 | 0.795328 | 0.890844 |   |
| Benton | ESS                         | 74 | 0.028182 | 0.811608 | 0.894918 |   |
| Benton | RBDSQ                       | 74 | -0.16284 | 0.165688 | 0.427707 |   |
| Benton | Systolic BP Drop            | 74 | -0.05767 | 0.625513 | 0.820235 |   |
| Benton | SCOPA autonome              | 74 | -0.08057 | 0.494999 | 0.750955 |   |
| Benton | Schwab England ADL          | 74 | 0.174415 | 0.137213 | 0.365536 |   |
| Benton | UPDRS I                     | 74 | 0.07538  | 0.523268 | 0.770548 |   |
| Benton | UPDRS II                    | 74 | -0.08931 | 0.449225 | 0.718752 |   |
| Benton | UPDRS III OFF               | 70 | -0.29546 | 0.013022 | 0.074127 |   |
| Benton | UPDRS III ON                | 71 | -0.29014 | 0.014113 | 0.077044 |   |
| Benton | UPDRS IV                    | 72 | -0.00958 | 0.936374 | 0.963872 |   |
| Benton | LEDD                        | 74 | -0.10806 | 0.359452 | 0.628522 |   |
| Benton | sum_walking_minutes         | 74 | 0.202089 | 0.084221 | 0.257485 |   |
| Benton | hourly_step_count_sum       | 74 | 0.303261 | 0.008627 | 0.05744  |   |
| Benton | sleep_efficiency            | 32 | -0.21344 | 0.240826 | 0.525868 |   |
| Benton | num_awakenings              | 32 | 0.072994 | 0.691355 | 0.849525 |   |
| Benton | total_sleep_time_hour       | 32 | 0.23031  | 0.204754 | 0.481858 |   |
| Benton | wake_after_sleep_onset_hour | 32 | -0.06426 | 0.726791 | 0.870173 |   |
| Benton | total_nrem_time_hour        | 32 | 0.216074 | 0.234927 | 0.519805 |   |



|                          |                             |    |          |          |          |   |
|--------------------------|-----------------------------|----|----------|----------|----------|---|
| Benton                   | total_rem_time_hour         | 32 | 0.199851 | 0.272792 | 0.549034 |   |
| Benton                   | total_deep_nrem_time_hour   | 32 | 0.082548 | 0.653322 | 0.836754 |   |
| Benton                   | total_light_nrem_time_hour  | 32 | 0.206816 | 0.256077 | 0.536312 |   |
| Benton                   | hourly_mean_pulse_rate      | 74 | -0.07828 | 0.507383 | 0.759364 |   |
| Benton                   | hourly_mean_rmssd           | 73 | -0.111   | 0.349851 | 0.622996 |   |
| Benton                   | hourly_median_rmssd         | 73 | -0.1116  | 0.347236 | 0.622008 |   |
| Benton                   | hourly_rmssd_variance       | 72 | -0.03159 | 0.792235 | 0.890844 |   |
| Letter Number Sequencing | HVLT Recall                 | 74 | 0.544284 | 5.37E-07 | 2.24E-05 | * |
| Letter Number Sequencing | HVLT Recognition            | 73 | 0.120207 | 0.31106  | 0.590216 |   |
| Letter Number Sequencing | HVLT Retention              | 74 | 0.230183 | 0.048498 | 0.169998 |   |
| Letter Number Sequencing | Symbol Digit                | 74 | 0.565994 | 1.48E-07 | 8.2E-06  | * |
| Letter Number Sequencing | STAI trait                  | 74 | -0.00881 | 0.940634 | 0.966763 |   |
| Letter Number Sequencing | STAI state                  | 74 | -0.05179 | 0.661221 | 0.843627 |   |
| Letter Number Sequencing | GDS                         | 74 | 0.021176 | 0.857872 | 0.926543 |   |
| Letter Number Sequencing | QUIP                        | 74 | -0.11803 | 0.316553 | 0.594274 |   |
| Letter Number Sequencing | ESS                         | 74 | 0.133973 | 0.25512  | 0.535993 |   |
| Letter Number Sequencing | RBDSQ                       | 74 | -0.10903 | 0.355117 | 0.625682 |   |
| Letter Number Sequencing | Systolic BP Drop            | 74 | -0.22631 | 0.052512 | 0.178434 |   |
| Letter Number Sequencing | SCOPA autonome              | 74 | -0.22749 | 0.051266 | 0.176908 |   |
| Letter Number Sequencing | Schwab England ADL          | 74 | 0.142407 | 0.226142 | 0.51228  |   |
| Letter Number Sequencing | UPDRS I                     | 74 | 0.047375 | 0.68855  | 0.849525 |   |
| Letter Number Sequencing | UPDRS II                    | 74 | -0.31295 | 0.006631 | 0.04843  | * |
| Letter Number Sequencing | UPDRS III OFF               | 70 | -0.27886 | 0.019406 | 0.091928 |   |
| Letter Number Sequencing | UPDRS III ON                | 71 | -0.34812 | 0.002931 | 0.026737 | * |
| Letter Number Sequencing | UPDRS IV                    | 72 | -0.10631 | 0.37413  | 0.640542 |   |
| Letter Number Sequencing | LEDD                        | 74 | 0.006958 | 0.953083 | 0.975043 |   |
| Letter Number Sequencing | sum_walking_minutes         | 74 | 0.327831 | 0.004353 | 0.035358 | * |
| Letter Number Sequencing | hourly_step_count_sum       | 74 | 0.463868 | 3.15E-05 | 0.000635 | * |
| Letter Number Sequencing | sleep_efficiency            | 32 | 0.193689 | 0.288155 | 0.564445 |   |
| Letter Number Sequencing | num_awakenings              | 32 | -0.13378 | 0.465416 | 0.729716 |   |
| Letter Number Sequencing | total_sleep_time_hour       | 32 | 0.415825 | 0.017933 | 0.087821 |   |
| Letter Number Sequencing | wake_after_sleep_onset_hour | 32 | -0.52517 | 0.002027 | 0.019281 | * |
| Letter Number Sequencing | total_nrem_time_hour        | 32 | 0.458151 | 0.008366 | 0.056853 |   |
| Letter Number Sequencing | total_rem_time_hour         | 32 | 0.198642 | 0.275763 | 0.549034 |   |
| Letter Number Sequencing | total_deep_nrem_time_hour   | 32 | 0.211616 | 0.244959 | 0.526267 |   |
| Letter Number Sequencing | total_light_nrem_time_hour  | 32 | 0.427836 | 0.01458  | 0.077681 |   |
| Letter Number Sequencing | hourly_mean_pulse_rate      | 74 | 0.272332 | 0.018907 | 0.09059  |   |
| Letter Number Sequencing | hourly_mean_rmssd           | 73 | -0.05791 | 0.626478 | 0.820235 |   |
| Letter Number Sequencing | hourly_median_rmssd         | 73 | -0.05544 | 0.641299 | 0.829331 |   |
| Letter Number Sequencing | hourly_rmssd_variance       | 72 | 0.029659 | 0.804667 | 0.890844 |   |
| HVLT Recall              | HVLT Recognition            | 73 | 0.402225 | 0.000419 | 0.005944 | * |
| HVLT Recall              | HVLT Retention              | 74 | 0.524612 | 1.6E-06  | 5.09E-05 | * |
| HVLT Recall              | Symbol Digit                | 74 | 0.583809 | 4.77E-08 | 3.18E-06 | * |
| HVLT Recall              | STAI trait                  | 74 | -0.18224 | 0.120165 | 0.32934  |   |
| HVLT Recall              | STAI state                  | 74 | -0.23122 | 0.04747  | 0.167275 |   |
| HVLT Recall              | GDS                         | 74 | -0.12868 | 0.274538 | 0.549034 |   |

|                  |                             |    |          |          |          |   |
|------------------|-----------------------------|----|----------|----------|----------|---|
| HVLT Recall      | QUIP                        | 74 | -0.03295 | 0.780499 | 0.890844 |   |
| HVLT Recall      | ESS                         | 74 | 0.04698  | 0.691018 | 0.849525 |   |
| HVLT Recall      | RBDSQ                       | 74 | 0.073164 | 0.535587 | 0.774157 |   |
| HVLT Recall      | Systolic BP Drop            | 74 | -0.26991 | 0.020036 | 0.093742 |   |
| HVLT Recall      | SCOPA autonome              | 74 | 0.056578 | 0.632079 | 0.825421 |   |
| HVLT Recall      | Schwab England ADL          | 74 | 0.01948  | 0.869151 | 0.932133 |   |
| HVLT Recall      | UPDRS I                     | 74 | 0.098843 | 0.402109 | 0.67119  |   |
| HVLT Recall      | UPDRS II                    | 74 | -0.24185 | 0.037896 | 0.145051 |   |
| HVLT Recall      | UPDRS III OFF               | 70 | -0.36311 | 0.002005 | 0.019281 | * |
| HVLT Recall      | UPDRS III ON                | 71 | -0.25536 | 0.031609 | 0.127632 |   |
| HVLT Recall      | UPDRS IV                    | 72 | -0.06141 | 0.608325 | 0.811434 |   |
| HVLT Recall      | LEDD                        | 74 | 0.084649 | 0.473329 | 0.729716 |   |
| HVLT Recall      | sum_walking_minutes         | 74 | 0.306423 | 0.007924 | 0.054409 |   |
| HVLT Recall      | hourly_step_count_sum       | 74 | 0.299174 | 0.009615 | 0.061574 |   |
| HVLT Recall      | sleep_efficiency            | 32 | 0.401262 | 0.022835 | 0.10276  |   |
| HVLT Recall      | num_awakenings              | 32 | 0.211798 | 0.244543 | 0.526267 |   |
| HVLT Recall      | total_sleep_time_hour       | 32 | 0.626706 | 0.000124 | 0.002068 | * |
| HVLT Recall      | wake_after_sleep_onset_hour | 32 | -0.19157 | 0.293566 | 0.568101 |   |
| HVLT Recall      | total_nrem_time_hour        | 32 | 0.567645 | 0.000703 | 0.008669 | * |
| HVLT Recall      | total_rem_time_hour         | 32 | 0.592273 | 0.000355 | 0.005145 | * |
| HVLT Recall      | total_deep_nrem_time_hour   | 32 | 0.389123 | 0.027721 | 0.116114 |   |
| HVLT Recall      | total_light_nrem_time_hour  | 32 | 0.493016 | 0.004144 | 0.034424 | * |
| HVLT Recall      | hourly_mean_pulse_rate      | 74 | 0.111313 | 0.345076 | 0.622008 |   |
| HVLT Recall      | hourly_mean_rmssd           | 73 | -0.27834 | 0.017107 | 0.084395 |   |
| HVLT Recall      | hourly_median_rmssd         | 73 | -0.28489 | 0.014569 | 0.077681 |   |
| HVLT Recall      | hourly_rmssd_variance       | 72 | -0.05413 | 0.651537 | 0.836727 |   |
| HVLT Recognition | HVLT Retention              | 73 | 0.235791 | 0.044618 | 0.15976  |   |
| HVLT Recognition | Symbol Digit                | 73 | 0.153755 | 0.194031 | 0.471622 |   |
| HVLT Recognition | STAI trait                  | 73 | -0.22582 | 0.054737 | 0.184116 |   |
| HVLT Recognition | STAI state                  | 73 | -0.29903 | 0.010173 | 0.062734 |   |
| HVLT Recognition | GDS                         | 73 | -0.2032  | 0.084673 | 0.2575   |   |
| HVLT Recognition | QUIP                        | 73 | 0.15935  | 0.178107 | 0.446212 |   |
| HVLT Recognition | ESS                         | 73 | -0.1102  | 0.353345 | 0.624239 |   |
| HVLT Recognition | RBDSQ                       | 73 | 0.012504 | 0.916379 | 0.958098 |   |
| HVLT Recognition | Systolic BP Drop            | 73 | -0.06655 | 0.575904 | 0.799067 |   |
| HVLT Recognition | SCOPA autonome              | 73 | 0.093961 | 0.429119 | 0.702195 |   |
| HVLT Recognition | Schwab England ADL          | 73 | 0.03965  | 0.739096 | 0.878996 |   |
| HVLT Recognition | UPDRS I                     | 73 | -0.03237 | 0.785741 | 0.890844 |   |
| HVLT Recognition | UPDRS II                    | 73 | -0.04444 | 0.708879 | 0.859951 |   |
| HVLT Recognition | UPDRS III OFF               | 69 | -0.09805 | 0.422853 | 0.695358 |   |
| HVLT Recognition | UPDRS III ON                | 70 | 0.020387 | 0.866967 | 0.931707 |   |
| HVLT Recognition | UPDRS IV                    | 71 | -0.06935 | 0.565519 | 0.791251 |   |
| HVLT Recognition | LEDD                        | 73 | -0.07756 | 0.514234 | 0.766174 |   |
| HVLT Recognition | sum_walking_minutes         | 73 | -0.10472 | 0.377936 | 0.643748 |   |
| HVLT Recognition | hourly_step_count_sum       | 73 | -0.00164 | 0.989027 | 0.992006 |   |
| HVLT Recognition | sleep_efficiency            | 31 | 0.074561 | 0.690165 | 0.849525 |   |

|                  |                             |    |          |          |          |   |
|------------------|-----------------------------|----|----------|----------|----------|---|
| HVLT Recognition | num_awakenings              | 31 | 0.26775  | 0.145323 | 0.382411 |   |
| HVLT Recognition | total_sleep_time_hour       | 31 | 0.403968 | 0.024209 | 0.106997 |   |
| HVLT Recognition | wake_after_sleep_onset_hour | 31 | 0.042704 | 0.81957  | 0.902205 |   |
| HVLT Recognition | total_nrem_time_hour        | 31 | 0.370383 | 0.040261 | 0.149799 |   |
| HVLT Recognition | total_rem_time_hour         | 31 | 0.374739 | 0.037793 | 0.145051 |   |
| HVLT Recognition | total_deep_nrem_time_hour   | 31 | 0.247415 | 0.179625 | 0.4472   |   |
| HVLT Recognition | total_light_nrem_time_hour  | 31 | 0.318851 | 0.080414 | 0.25026  |   |
| HVLT Recognition | hourly_mean_pulse_rate      | 73 | -0.01526 | 0.898055 | 0.944873 |   |
| HVLT Recognition | hourly_mean_rmssd           | 72 | -0.16452 | 0.167275 | 0.428481 |   |
| HVLT Recognition | hourly_median_rmssd         | 72 | -0.14042 | 0.2394   | 0.524475 |   |
| HVLT Recognition | hourly_rmssd_variance       | 71 | -0.14781 | 0.218638 | 0.504271 |   |
| HVLT Retention   | Symbol Digit                | 74 | 0.32594  | 0.004598 | 0.036454 | * |
| HVLT Retention   | STAI trait                  | 74 | -0.1936  | 0.098381 | 0.287375 |   |
| HVLT Retention   | STAI state                  | 74 | -0.19553 | 0.095018 | 0.28001  |   |
| HVLT Retention   | GDS                         | 74 | 0.038102 | 0.747224 | 0.881017 |   |
| HVLT Retention   | QUIP                        | 74 | -0.04427 | 0.707986 | 0.859951 |   |
| HVLT Retention   | ESS                         | 74 | 0.086353 | 0.464439 | 0.729716 |   |
| HVLT Retention   | RBDSQ                       | 74 | -0.14031 | 0.233129 | 0.519278 |   |
| HVLT Retention   | Systolic BP Drop            | 74 | -0.19694 | 0.092599 | 0.276315 |   |
| HVLT Retention   | SCOPA autonome              | 74 | 0.150327 | 0.201099 | 0.47836  |   |
| HVLT Retention   | Schwab England ADL          | 74 | 0.01975  | 0.867355 | 0.931707 |   |
| HVLT Retention   | UPDRS I                     | 74 | -0.01202 | 0.919066 | 0.958284 |   |
| HVLT Retention   | UPDRS II                    | 74 | -0.10204 | 0.386992 | 0.652498 |   |
| HVLT Retention   | UPDRS III OFF               | 70 | -0.30766 | 0.009574 | 0.061574 |   |
| HVLT Retention   | UPDRS III ON                | 71 | -0.2073  | 0.08281  | 0.25533  |   |
| HVLT Retention   | UPDRS IV                    | 72 | -0.28031 | 0.017082 | 0.084395 |   |
| HVLT Retention   | LEDD                        | 74 | 0.054327 | 0.645713 | 0.831808 |   |
| HVLT Retention   | sum_walking_minutes         | 74 | 0.139949 | 0.23434  | 0.519805 |   |
| HVLT Retention   | hourly_step_count_sum       | 74 | 0.177941 | 0.129323 | 0.350119 |   |
| HVLT Retention   | sleep_efficiency            | 32 | 0.349082 | 0.050202 | 0.175051 |   |
| HVLT Retention   | num_awakenings              | 32 | 0.057638 | 0.754023 | 0.881017 |   |
| HVLT Retention   | total_sleep_time_hour       | 32 | 0.445992 | 0.010515 | 0.064247 |   |
| HVLT Retention   | wake_after_sleep_onset_hour | 32 | -0.28866 | 0.109096 | 0.308872 |   |
| HVLT Retention   | total_nrem_time_hour        | 32 | 0.449733 | 0.009809 | 0.062217 |   |
| HVLT Retention   | total_rem_time_hour         | 32 | 0.312364 | 0.081763 | 0.253275 |   |
| HVLT Retention   | total_deep_nrem_time_hour   | 32 | 0.006616 | 0.971334 | 0.98464  |   |
| HVLT Retention   | total_light_nrem_time_hour  | 32 | 0.478709 | 0.005577 | 0.042694 | * |
| HVLT Retention   | hourly_mean_pulse_rate      | 74 | -0.01038 | 0.930069 | 0.961842 |   |
| HVLT Retention   | hourly_mean_rmssd           | 73 | -0.29731 | 0.010637 | 0.064405 |   |
| HVLT Retention   | hourly_median_rmssd         | 73 | -0.29681 | 0.010775 | 0.06465  |   |
| HVLT Retention   | hourly_rmssd_variance       | 72 | -0.03069 | 0.798025 | 0.890844 |   |
| Symbol Digit     | STAI trait                  | 74 | -0.11424 | 0.332474 | 0.604994 |   |
| Symbol Digit     | STAI state                  | 74 | -0.21496 | 0.06588  | 0.215893 |   |
| Symbol Digit     | GDS                         | 74 | 0.035468 | 0.76417  | 0.883703 |   |
| Symbol Digit     | QUIP                        | 74 | -0.02999 | 0.799791 | 0.890844 |   |
| Symbol Digit     | ESS                         | 74 | 0.146276 | 0.21365  | 0.499265 |   |

|              |                             |    |          |          |          |   |
|--------------|-----------------------------|----|----------|----------|----------|---|
| Symbol Digit | RBDSQ                       | 74 | -0.14269 | 0.225218 | 0.51228  |   |
| Symbol Digit | Systolic BP Drop            | 74 | -0.24083 | 0.038739 | 0.146593 |   |
| Symbol Digit | SCOPA autonome              | 74 | -0.13692 | 0.244731 | 0.526267 |   |
| Symbol Digit | Schwab England ADL          | 74 | 0.129074 | 0.273069 | 0.549034 |   |
| Symbol Digit | UPDRS I                     | 74 | 0.050701 | 0.667927 | 0.845703 |   |
| Symbol Digit | UPDRS II                    | 74 | -0.24505 | 0.03535  | 0.137678 |   |
| Symbol Digit | UPDRS III OFF               | 70 | -0.39047 | 0.000832 | 0.0099   | * |
| Symbol Digit | UPDRS III ON                | 71 | -0.36443 | 0.001782 | 0.018254 | * |
| Symbol Digit | UPDRS IV                    | 72 | -0.04881 | 0.683911 | 0.849525 |   |
| Symbol Digit | LEDD                        | 74 | -0.0095  | 0.935969 | 0.963872 |   |
| Symbol Digit | sum_walking_minutes         | 74 | 0.366247 | 0.001331 | 0.014297 | * |
| Symbol Digit | hourly_step_count_sum       | 74 | 0.38578  | 0.000687 | 0.008639 | * |
| Symbol Digit | sleep_efficiency            | 32 | 0.24182  | 0.182399 | 0.451591 |   |
| Symbol Digit | num_awakenings              | 32 | -0.19462 | 0.285791 | 0.561465 |   |
| Symbol Digit | total_sleep_time_hour       | 32 | 0.422411 | 0.016023 | 0.084027 |   |
| Symbol Digit | wake_after_sleep_onset_hour | 32 | -0.42108 | 0.016394 | 0.084148 |   |
| Symbol Digit | total_nrem_time_hour        | 32 | 0.408944 | 0.020128 | 0.093742 |   |
| Symbol Digit | total_rem_time_hour         | 32 | 0.336402 | 0.059761 | 0.199005 |   |
| Symbol Digit | total_deep_nrem_time_hour   | 32 | 0.463539 | 0.00754  | 0.052858 |   |
| Symbol Digit | total_light_nrem_time_hour  | 32 | 0.301675 | 0.09335  | 0.276315 |   |
| Symbol Digit | hourly_mean_pulse_rate      | 74 | 0.163291 | 0.164493 | 0.426275 |   |
| Symbol Digit | hourly_mean_rmssd           | 73 | -0.03197 | 0.788297 | 0.890844 |   |
| Symbol Digit | hourly_median_rmssd         | 73 | -0.01759 | 0.882555 | 0.93745  |   |
| Symbol Digit | hourly_rmssd_variance       | 72 | 0.084163 | 0.482119 | 0.739842 |   |
| STAI trait   | STAI state                  | 75 | 0.7212   | 2.93E-13 | 2.79E-11 | * |
| STAI trait   | GDS                         | 75 | 0.642249 | 5.28E-10 | 4.39E-08 | * |
| STAI trait   | QUIP                        | 75 | 0.214372 | 0.064766 | 0.213535 |   |
| STAI trait   | ESS                         | 75 | 0.154242 | 0.186416 | 0.458128 |   |
| STAI trait   | RBDSQ                       | 75 | 0.109801 | 0.348362 | 0.622008 |   |
| STAI trait   | Systolic BP Drop            | 75 | 0.180144 | 0.121965 | 0.332906 |   |
| STAI trait   | SCOPA autonome              | 75 | 0.061195 | 0.60198  | 0.811434 |   |
| STAI trait   | Schwab England ADL          | 75 | -0.35199 | 0.001956 | 0.019281 | * |
| STAI trait   | UPDRS I                     | 75 | 0.52761  | 1.15E-06 | 4.51E-05 | * |
| STAI trait   | UPDRS II                    | 75 | 0.281342 | 0.014478 | 0.077681 |   |
| STAI trait   | UPDRS III OFF               | 70 | 0.113034 | 0.351508 | 0.624239 |   |
| STAI trait   | UPDRS III ON                | 72 | 0.008635 | 0.942608 | 0.967299 |   |
| STAI trait   | UPDRS IV                    | 73 | 0.355566 | 0.002021 | 0.019281 | * |
| STAI trait   | LEDD                        | 75 | -0.02992 | 0.79888  | 0.890844 |   |
| STAI trait   | sum_walking_minutes         | 75 | 0.020955 | 0.858374 | 0.926543 |   |
| STAI trait   | hourly_step_count_sum       | 75 | -0.12635 | 0.280046 | 0.551806 |   |
| STAI trait   | sleep_efficiency            | 33 | 0.120428 | 0.50441  | 0.756616 |   |
| STAI trait   | num_awakenings              | 33 | 0.108647 | 0.547273 | 0.782154 |   |
| STAI trait   | total_sleep_time_hour       | 33 | -0.05503 | 0.761021 | 0.883703 |   |
| STAI trait   | wake_after_sleep_onset_hour | 33 | 0.121801 | 0.499525 | 0.75243  |   |
| STAI trait   | total_nrem_time_hour        | 33 | -0.04936 | 0.785033 | 0.890844 |   |
| STAI trait   | total_rem_time_hour         | 33 | -0.05327 | 0.768429 | 0.883871 |   |

|            |                             |    |          |          |          |   |
|------------|-----------------------------|----|----------|----------|----------|---|
| STAI trait | total_deep_nrem_time_hour   | 33 | -0.05296 | 0.769737 | 0.883871 |   |
| STAI trait | total_light_nrem_time_hour  | 33 | -0.03724 | 0.836988 | 0.913826 |   |
| STAI trait | hourly_mean_pulse_rate      | 75 | 0.04212  | 0.719746 | 0.865254 |   |
| STAI trait | hourly_mean_rmssd           | 74 | 0.129769 | 0.270473 | 0.549034 |   |
| STAI trait | hourly_median_rmssd         | 74 | 0.10375  | 0.379037 | 0.643976 |   |
| STAI trait | hourly_rmssd_variance       | 73 | 0.130672 | 0.270495 | 0.549034 |   |
| STAI state | GDS                         | 75 | 0.568881 | 1.01E-07 | 6.11E-06 | * |
| STAI state | QUIP                        | 75 | -0.0847  | 0.469993 | 0.729716 |   |
| STAI state | ESS                         | 75 | -0.00468 | 0.968227 | 0.98464  |   |
| STAI state | RBDSQ                       | 75 | 0.149553 | 0.200325 | 0.47836  |   |
| STAI state | Systolic BP Drop            | 75 | 0.207331 | 0.074289 | 0.23338  |   |
| STAI state | SCOPA autonome              | 75 | 0.061098 | 0.602561 | 0.811434 |   |
| STAI state | Schwab England ADL          | 75 | -0.36897 | 0.001124 | 0.012451 | * |
| STAI state | UPDRS I                     | 75 | 0.338008 | 0.003018 | 0.027162 | * |
| STAI state | UPDRS II                    | 75 | 0.236806 | 0.040801 | 0.150963 |   |
| STAI state | UPDRS III OFF               | 70 | 0.257169 | 0.031621 | 0.127632 |   |
| STAI state | UPDRS III ON                | 72 | 0.188855 | 0.112112 | 0.311111 |   |
| STAI state | UPDRS IV                    | 73 | 0.305273 | 0.008633 | 0.05744  |   |
| STAI state | LEDD                        | 75 | -0.06752 | 0.564907 | 0.791251 |   |
| STAI state | sum_walking_minutes         | 75 | -0.10996 | 0.347673 | 0.622008 |   |
| STAI state | hourly_step_count_sum       | 75 | -0.23367 | 0.043626 | 0.157055 |   |
| STAI state | sleep_efficiency            | 33 | 0.162184 | 0.367194 | 0.635198 |   |
| STAI state | num_awakenings              | 33 | 0.286587 | 0.105887 | 0.303969 |   |
| STAI state | total_sleep_time_hour       | 33 | -0.04504 | 0.803451 | 0.890844 |   |
| STAI state | wake_after_sleep_onset_hour | 33 | 0.219905 | 0.21882  | 0.504271 |   |
| STAI state | total_nrem_time_hour        | 33 | 0.009591 | 0.957754 | 0.978319 |   |
| STAI state | total_rem_time_hour         | 33 | -0.16165 | 0.368804 | 0.63633  |   |
| STAI state | total_deep_nrem_time_hour   | 33 | -0.08882 | 0.623038 | 0.820046 |   |
| STAI state | total_light_nrem_time_hour  | 33 | 0.03601  | 0.842302 | 0.917175 |   |
| STAI state | hourly_mean_pulse_rate      | 75 | 0.068583 | 0.558776 | 0.789928 |   |
| STAI state | hourly_mean_rmssd           | 74 | 0.159704 | 0.17409  | 0.442535 |   |
| STAI state | hourly_median_rmssd         | 74 | 0.112428 | 0.340234 | 0.61575  |   |
| STAI state | hourly_rmssd_variance       | 73 | 0.083621 | 0.481832 | 0.739842 |   |
| GDS        | QUIP                        | 75 | 0.114536 | 0.327839 | 0.602213 |   |
| GDS        | ESS                         | 75 | 0.166251 | 0.154003 | 0.40222  |   |
| GDS        | RBDSQ                       | 75 | 0.193878 | 0.095576 | 0.280413 |   |
| GDS        | Systolic BP Drop            | 75 | 0.156506 | 0.179954 | 0.4472   |   |
| GDS        | SCOPA autonome              | 75 | 0.081526 | 0.486842 | 0.742027 |   |
| GDS        | Schwab England ADL          | 75 | -0.32954 | 0.003889 | 0.033204 | * |
| GDS        | UPDRS I                     | 75 | 0.457906 | 3.62E-05 | 0.000708 | * |
| GDS        | UPDRS II                    | 75 | 0.278436 | 0.015569 | 0.082293 |   |
| GDS        | UPDRS III OFF               | 70 | 0.08735  | 0.472117 | 0.729716 |   |
| GDS        | UPDRS III ON                | 72 | -0.06192 | 0.605357 | 0.811434 |   |
| GDS        | UPDRS IV                    | 73 | 0.316834 | 0.006313 | 0.047244 | * |
| GDS        | LEDD                        | 75 | -0.06234 | 0.595189 | 0.810625 |   |
| GDS        | sum_walking_minutes         | 75 | 0.037349 | 0.750388 | 0.881017 |   |

|      |                             |    |          |          |            |
|------|-----------------------------|----|----------|----------|------------|
| GDS  | hourly_step_count_sum       | 75 | -0.09068 | 0.439121 | 0.710304   |
| GDS  | sleep_efficiency            | 33 | 0.119008 | 0.509487 | 0.760804   |
| GDS  | num_awakenings              | 33 | 0.070056 | 0.698462 | 0.853533   |
| GDS  | total_sleep_time_hour       | 33 | -0.04584 | 0.800032 | 0.890844   |
| GDS  | wake_after_sleep_onset_hour | 33 | -0.06553 | 0.717127 | 0.863665   |
| GDS  | total_nrem_time_hour        | 33 | -0.05307 | 0.769294 | 0.883871   |
| GDS  | total_rem_time_hour         | 33 | -0.01616 | 0.928878 | 0.961842   |
| GDS  | total_deep_nrem_time_hour   | 33 | -0.06278 | 0.72852  | 0.870173   |
| GDS  | total_light_nrem_time_hour  | 33 | -0.03834 | 0.832222 | 0.912922   |
| GDS  | hourly_mean_pulse_rate      | 75 | -0.03484 | 0.76664  | 0.883871   |
| GDS  | hourly_mean_rmssd           | 74 | 0.165346 | 0.159173 | 0.414099   |
| GDS  | hourly_median_rmssd         | 74 | 0.135486 | 0.249747 | 0.533113   |
| GDS  | hourly_rmssd_variance       | 73 | 0.130294 | 0.271895 | 0.549034   |
| QUIP | ESS                         | 75 | 0.113823 | 0.330878 | 0.603739   |
| QUIP | RBDSQ                       | 75 | 0.060423 | 0.606582 | 0.811434   |
| QUIP | Systolic BP Drop            | 75 | 0.043203 | 0.712847 | 0.863193   |
| QUIP | SCOPA autonome              | 75 | 0.110378 | 0.345818 | 0.622008   |
| QUIP | Schwab England ADL          | 75 | -0.02247 | 0.848252 | 0.920091   |
| QUIP | UPDRS I                     | 75 | 0.249044 | 0.03119  | 0.127441   |
| QUIP | UPDRS II                    | 75 | 0.148825 | 0.202549 | 0.47836    |
| QUIP | UPDRS III OFF               | 70 | -0.09411 | 0.438395 | 0.710304   |
| QUIP | UPDRS III ON                | 72 | 0.068974 | 0.564812 | 0.791251   |
| QUIP | UPDRS IV                    | 73 | 0.093741 | 0.430207 | 0.702249   |
| QUIP | LEDD                        | 75 | 0.000728 | 0.995055 | 0.995055   |
| QUIP | sum_walking_minutes         | 75 | 0.092798 | 0.428439 | 0.702195   |
| QUIP | hourly_step_count_sum       | 75 | 0.03852  | 0.742826 | 0.881017   |
| QUIP | sleep_efficiency            | 33 | -0.01642 | 0.927715 | 0.961842   |
| QUIP | num_awakenings              | 33 | -0.01819 | 0.919974 | 0.958284   |
| QUIP | total_sleep_time_hour       | 33 | 0.037749 | 0.834789 | 0.912922   |
| QUIP | wake_after_sleep_onset_hour | 33 | -0.06621 | 0.714283 | 0.863362   |
| QUIP | total_nrem_time_hour        | 33 | -0.04033 | 0.823665 | 0.905217   |
| QUIP | total_rem_time_hour         | 33 | 0.211729 | 0.236864 | 0.522355   |
| QUIP | total_deep_nrem_time_hour   | 33 | 0.282812 | 0.11077  | 0.30997    |
| QUIP | total_light_nrem_time_hour  | 33 | -0.12509 | 0.487912 | 0.742027   |
| QUIP | hourly_mean_pulse_rate      | 75 | 0.005745 | 0.960987 | 0.980119   |
| QUIP | hourly_mean_rmssd           | 74 | -0.21125 | 0.070806 | 0.22563    |
| QUIP | hourly_median_rmssd         | 74 | -0.16231 | 0.167081 | 0.428481   |
| QUIP | hourly_rmssd_variance       | 73 | 0.049888 | 0.675108 | 0.84798    |
| ESS  | RBDSQ                       | 75 | 0.14019  | 0.230287 | 0.518146   |
| ESS  | Systolic BP Drop            | 75 | 0.114707 | 0.327111 | 0.602213   |
| ESS  | SCOPA autonome              | 75 | 0.119268 | 0.308116 | 0.5867     |
| ESS  | Schwab England ADL          | 75 | -0.03376 | 0.773694 | 0.886885   |
| ESS  | UPDRS I                     | 75 | 0.419289 | 0.000181 | 0.002869 * |
| ESS  | UPDRS II                    | 75 | 0.276275 | 0.016425 | 0.084148   |
| ESS  | UPDRS III OFF               | 70 | 0.122226 | 0.313458 | 0.593077   |
| ESS  | UPDRS III ON                | 72 | 0.065698 | 0.583483 | 0.803773   |

|                  |                             |    |          |          |          |   |
|------------------|-----------------------------|----|----------|----------|----------|---|
| ESS              | UPDRS IV                    | 73 | 0.100094 | 0.399472 | 0.670147 |   |
| ESS              | LEDD                        | 75 | 0.076028 | 0.516788 | 0.76826  |   |
| ESS              | sum_walking_minutes         | 75 | 0.412247 | 0.000238 | 0.003683 | * |
| ESS              | hourly_step_count_sum       | 75 | 0.313678 | 0.006136 | 0.046437 | * |
| ESS              | sleep_efficiency            | 33 | 0.318098 | 0.071222 | 0.225876 |   |
| ESS              | num_awakenings              | 33 | -0.11497 | 0.524067 | 0.770548 |   |
| ESS              | total_sleep_time_hour       | 33 | 0.006989 | 0.969211 | 0.98464  |   |
| ESS              | wake_after_sleep_onset_hour | 33 | -0.13581 | 0.451109 | 0.718752 |   |
| ESS              | total_nrem_time_hour        | 33 | 0.006605 | 0.970899 | 0.98464  |   |
| ESS              | total_rem_time_hour         | 33 | 0.005971 | 0.973692 | 0.98553  |   |
| ESS              | total_deep_nrem_time_hour   | 33 | 0.085071 | 0.637848 | 0.827803 |   |
| ESS              | total_light_nrem_time_hour  | 33 | -0.01766 | 0.922313 | 0.958284 |   |
| ESS              | hourly_mean_pulse_rate      | 75 | 0.258814 | 0.024955 | 0.107226 |   |
| ESS              | hourly_mean_rmssd           | 74 | -0.10693 | 0.364507 | 0.633471 |   |
| ESS              | hourly_median_rmssd         | 74 | -0.08529 | 0.469964 | 0.729716 |   |
| ESS              | hourly_rmssd_variance       | 73 | -0.08011 | 0.50049  | 0.75243  |   |
| RBDSQ            | Systolic BP Drop            | 75 | 0.258057 | 0.025397 | 0.108425 |   |
| RBDSQ            | SCOPA autonome              | 75 | 0.513662 | 2.44E-06 | 6.77E-05 | * |
| RBDSQ            | Schwab England ADL          | 75 | -0.17558 | 0.131875 | 0.354148 |   |
| RBDSQ            | UPDRS I                     | 75 | 0.431353 | 0.000112 | 0.001907 | * |
| RBDSQ            | UPDRS II                    | 75 | 0.379238 | 0.000792 | 0.009596 | * |
| RBDSQ            | UPDRS III OFF               | 70 | 0.311054 | 0.008768 | 0.05744  |   |
| RBDSQ            | UPDRS III ON                | 72 | 0.228491 | 0.053545 | 0.18102  |   |
| RBDSQ            | UPDRS IV                    | 73 | 0.499159 | 6.95E-06 | 0.000154 | * |
| RBDSQ            | LEDD                        | 75 | 0.071846 | 0.540177 | 0.777015 |   |
| RBDSQ            | sum_walking_minutes         | 75 | 0.115126 | 0.325339 | 0.602213 |   |
| RBDSQ            | hourly_step_count_sum       | 75 | 0.030652 | 0.794051 | 0.890844 |   |
| RBDSQ            | sleep_efficiency            | 33 | 0.035574 | 0.844187 | 0.917175 |   |
| RBDSQ            | num_awakenings              | 33 | 0.41404  | 0.016603 | 0.084395 |   |
| RBDSQ            | total_sleep_time_hour       | 33 | 0.035775 | 0.843319 | 0.917175 |   |
| RBDSQ            | wake_after_sleep_onset_hour | 33 | 0.404768 | 0.019462 | 0.091928 |   |
| RBDSQ            | total_nrem_time_hour        | 33 | -0.03796 | 0.833878 | 0.912922 |   |
| RBDSQ            | total_rem_time_hour         | 33 | 0.200041 | 0.26435  | 0.546885 |   |
| RBDSQ            | total_deep_nrem_time_hour   | 33 | -0.20076 | 0.262604 | 0.546544 |   |
| RBDSQ            | total_light_nrem_time_hour  | 33 | 0.017816 | 0.921609 | 0.958284 |   |
| RBDSQ            | hourly_mean_pulse_rate      | 75 | 0.044341 | 0.705625 | 0.859134 |   |
| RBDSQ            | hourly_mean_rmssd           | 74 | -0.03088 | 0.793985 | 0.890844 |   |
| RBDSQ            | hourly_median_rmssd         | 74 | 0.000772 | 0.99479  | 0.995055 |   |
| RBDSQ            | hourly_rmssd_variance       | 73 | -0.13135 | 0.267993 | 0.549034 |   |
| Systolic BP Drop | SCOPA autonome              | 75 | 0.069483 | 0.553614 | 0.786156 |   |
| Systolic BP Drop | Schwab England ADL          | 84 | -0.14415 | 0.190794 | 0.465454 |   |
| Systolic BP Drop | UPDRS I                     | 84 | 0.134763 | 0.221631 | 0.507239 |   |
| Systolic BP Drop | UPDRS II                    | 84 | 0.288185 | 0.007853 | 0.054409 |   |
| Systolic BP Drop | UPDRS III OFF               | 71 | 0.328409 | 0.005172 | 0.040054 | * |
| Systolic BP Drop | UPDRS III ON                | 80 | 0.286012 | 0.010115 | 0.062734 |   |
| Systolic BP Drop | UPDRS IV                    | 82 | 0.080418 | 0.472634 | 0.729716 |   |

|                    |                             |    |          |          |          |   |
|--------------------|-----------------------------|----|----------|----------|----------|---|
| Systolic BP Drop   | LEDD                        | 84 | 0.068556 | 0.535493 | 0.774157 |   |
| Systolic BP Drop   | sum_walking_minutes         | 84 | -0.13486 | 0.221295 | 0.507239 |   |
| Systolic BP Drop   | hourly_step_count_sum       | 84 | -0.18436 | 0.093185 | 0.276315 |   |
| Systolic BP Drop   | sleep_efficiency            | 36 | -0.1794  | 0.29514  | 0.568101 |   |
| Systolic BP Drop   | num_awakenings              | 36 | -0.02383 | 0.890286 | 0.941371 |   |
| Systolic BP Drop   | total_sleep_time_hour       | 36 | -0.26405 | 0.119673 | 0.32934  |   |
| Systolic BP Drop   | wake_after_sleep_onset_hour | 36 | 0.217563 | 0.202436 | 0.47836  |   |
| Systolic BP Drop   | total_nrem_time_hour        | 36 | -0.29173 | 0.084282 | 0.257485 |   |
| Systolic BP Drop   | total_rem_time_hour         | 36 | -0.08994 | 0.601922 | 0.811434 |   |
| Systolic BP Drop   | total_deep_nrem_time_hour   | 36 | -0.10161 | 0.555395 | 0.787006 |   |
| Systolic BP Drop   | total_light_nrem_time_hour  | 36 | -0.27132 | 0.10945  | 0.308872 |   |
| Systolic BP Drop   | hourly_mean_pulse_rate      | 84 | -0.08248 | 0.455752 | 0.72189  |   |
| Systolic BP Drop   | hourly_mean_rmssd           | 83 | -0.01463 | 0.895561 | 0.94374  |   |
| Systolic BP Drop   | hourly_median_rmssd         | 83 | -0.03457 | 0.756365 | 0.882205 |   |
| Systolic BP Drop   | hourly_rmssd_variance       | 82 | 0.121452 | 0.277064 | 0.549034 |   |
| SCOPA autonome     | Schwab England ADL          | 75 | -0.30713 | 0.007357 | 0.052127 |   |
| SCOPA autonome     | UPDRS I                     | 75 | 0.435652 | 9.36E-05 | 0.001685 | * |
| SCOPA autonome     | UPDRS II                    | 75 | 0.506357 | 3.57E-06 | 8.81E-05 | * |
| SCOPA autonome     | UPDRS III OFF               | 70 | 0.165156 | 0.171838 | 0.438484 |   |
| SCOPA autonome     | UPDRS III ON                | 72 | 0.238631 | 0.043521 | 0.157055 |   |
| SCOPA autonome     | UPDRS IV                    | 73 | 0.391974 | 0.000605 | 0.008013 | * |
| SCOPA autonome     | LEDD                        | 75 | 0.170666 | 0.143208 | 0.379985 |   |
| SCOPA autonome     | sum_walking_minutes         | 75 | 0.07261  | 0.535865 | 0.774157 |   |
| SCOPA autonome     | hourly_step_count_sum       | 75 | -0.07574 | 0.518406 | 0.768568 |   |
| SCOPA autonome     | sleep_efficiency            | 33 | -0.04697 | 0.795219 | 0.890844 |   |
| SCOPA autonome     | num_awakenings              | 33 | 0.435669 | 0.011269 | 0.066416 |   |
| SCOPA autonome     | total_sleep_time_hour       | 33 | -0.18645 | 0.298842 | 0.573571 |   |
| SCOPA autonome     | wake_after_sleep_onset_hour | 33 | 0.546748 | 0.000994 | 0.011413 | * |
| SCOPA autonome     | total_nrem_time_hour        | 33 | -0.19954 | 0.265577 | 0.547597 |   |
| SCOPA autonome     | total_rem_time_hour         | 33 | -0.10424 | 0.563735 | 0.791251 |   |
| SCOPA autonome     | total_deep_nrem_time_hour   | 33 | -0.00518 | 0.977191 | 0.986679 |   |
| SCOPA autonome     | total_light_nrem_time_hour  | 33 | -0.21121 | 0.238047 | 0.523232 |   |
| SCOPA autonome     | hourly_mean_pulse_rate      | 75 | -0.0354  | 0.763038 | 0.883703 |   |
| SCOPA autonome     | hourly_mean_rmssd           | 74 | -0.05968 | 0.613515 | 0.811434 |   |
| SCOPA autonome     | hourly_median_rmssd         | 74 | -0.04955 | 0.675064 | 0.84798  |   |
| SCOPA autonome     | hourly_rmssd_variance       | 73 | -0.19389 | 0.100257 | 0.291577 |   |
| Schwab England ADL | UPDRS I                     | 85 | -0.29303 | 0.006496 | 0.048072 | * |
| Schwab England ADL | UPDRS II                    | 85 | -0.5252  | 2.46E-07 | 1.17E-05 | * |
| Schwab England ADL | UPDRS III OFF               | 71 | -0.34474 | 0.003239 | 0.028758 | * |
| Schwab England ADL | UPDRS III ON                | 81 | -0.41721 | 0.000107 | 0.00187  | * |
| Schwab England ADL | UPDRS IV                    | 83 | -0.38342 | 0.000346 | 0.005125 | * |
| Schwab England ADL | LEDD                        | 85 | -0.09551 | 0.384567 | 0.650055 |   |
| Schwab England ADL | sum_walking_minutes         | 85 | 0.244635 | 0.024044 | 0.106997 |   |
| Schwab England ADL | hourly_step_count_sum       | 85 | 0.3641   | 0.000614 | 0.008013 | * |
| Schwab England ADL | sleep_efficiency            | 36 | -0.07065 | 0.682225 | 0.849525 |   |
| Schwab England ADL | num_awakenings              | 36 | -0.19622 | 0.251403 | 0.53323  |   |



|                    |                             |    |          |          |          |   |
|--------------------|-----------------------------|----|----------|----------|----------|---|
| Schwab England ADL | total_sleep_time_hour       | 36 | 0.356146 | 0.033013 | 0.130874 |   |
| Schwab England ADL | wake_after_sleep_onset_hour | 36 | -0.3029  | 0.072541 | 0.22897  |   |
| Schwab England ADL | total_nrem_time_hour        | 36 | 0.355742 | 0.033227 | 0.130941 |   |
| Schwab England ADL | total_rem_time_hour         | 36 | 0.21928  | 0.198808 | 0.47836  |   |
| Schwab England ADL | total_deep_nrem_time_hour   | 36 | 0.021336 | 0.901704 | 0.947216 |   |
| Schwab England ADL | total_light_nrem_time_hour  | 36 | 0.357047 | 0.032541 | 0.129774 |   |
| Schwab England ADL | hourly_mean_pulse_rate      | 85 | -0.08314 | 0.449372 | 0.718752 |   |
| Schwab England ADL | hourly_mean_rmssd           | 84 | 0.01671  | 0.88008  | 0.93745  |   |
| Schwab England ADL | hourly_median_rmssd         | 84 | 0.088727 | 0.422209 | 0.695358 |   |
| Schwab England ADL | hourly_rmssd_variance       | 83 | -0.13243 | 0.232682 | 0.519278 |   |
| UPDRS I            | UPDRS II                    | 85 | 0.482158 | 2.98E-06 | 7.93E-05 | * |
| UPDRS I            | UPDRS III OFF               | 71 | 0.159057 | 0.185203 | 0.456835 |   |
| UPDRS I            | UPDRS III ON                | 81 | 0.04712  | 0.676151 | 0.84798  |   |
| UPDRS I            | UPDRS IV                    | 83 | 0.485663 | 3.26E-06 | 8.34E-05 | * |
| UPDRS I            | LEDD                        | 85 | 0.088309 | 0.421576 | 0.695358 |   |
| UPDRS I            | sum_walking_minutes         | 85 | 0.107865 | 0.325796 | 0.602213 |   |
| UPDRS I            | hourly_step_count_sum       | 85 | -0.02864 | 0.794712 | 0.890844 |   |
| UPDRS I            | sleep_efficiency            | 36 | 0.197525 | 0.248194 | 0.531503 |   |
| UPDRS I            | num_awakenings              | 36 | 0.01817  | 0.91623  | 0.958098 |   |
| UPDRS I            | total_sleep_time_hour       | 36 | 0.003575 | 0.983491 | 0.987941 |   |
| UPDRS I            | wake_after_sleep_onset_hour | 36 | 0.139645 | 0.416626 | 0.690231 |   |
| UPDRS I            | total_nrem_time_hour        | 36 | -0.05462 | 0.751703 | 0.881017 |   |
| UPDRS I            | total_rem_time_hour         | 36 | 0.153289 | 0.372089 | 0.640339 |   |
| UPDRS I            | total_deep_nrem_time_hour   | 36 | 0.211768 | 0.215016 | 0.500703 |   |
| UPDRS I            | total_light_nrem_time_hour  | 36 | -0.10972 | 0.524111 | 0.770548 |   |
| UPDRS I            | hourly_mean_pulse_rate      | 85 | -0.05963 | 0.587744 | 0.803773 |   |
| UPDRS I            | hourly_mean_rmssd           | 84 | -0.05673 | 0.608248 | 0.811434 |   |
| UPDRS I            | hourly_median_rmssd         | 84 | -0.0575  | 0.603379 | 0.811434 |   |
| UPDRS I            | hourly_rmssd_variance       | 83 | -0.12258 | 0.269616 | 0.549034 |   |
| UPDRS II           | UPDRS III OFF               | 71 | 0.530513 | 1.95E-06 | 5.64E-05 | * |
| UPDRS II           | UPDRS III ON                | 81 | 0.451262 | 2.36E-05 | 0.00049  | * |
| UPDRS II           | UPDRS IV                    | 83 | 0.474471 | 5.86E-06 | 0.000134 | * |
| UPDRS II           | LEDD                        | 85 | 0.101912 | 0.35336  | 0.624239 |   |
| UPDRS II           | sum_walking_minutes         | 85 | -0.10995 | 0.316467 | 0.594274 |   |
| UPDRS II           | hourly_step_count_sum       | 85 | -0.2547  | 0.018652 | 0.090014 |   |
| UPDRS II           | sleep_efficiency            | 36 | -0.05997 | 0.728254 | 0.870173 |   |
| UPDRS II           | num_awakenings              | 36 | 0.143186 | 0.404788 | 0.673972 |   |
| UPDRS II           | total_sleep_time_hour       | 36 | -0.36534 | 0.028451 | 0.118426 |   |
| UPDRS II           | wake_after_sleep_onset_hour | 36 | 0.419054 | 0.010963 | 0.065188 |   |
| UPDRS II           | total_nrem_time_hour        | 36 | -0.42331 | 0.010098 | 0.062734 |   |
| UPDRS II           | total_rem_time_hour         | 36 | -0.07334 | 0.670796 | 0.846118 |   |
| UPDRS II           | total_deep_nrem_time_hour   | 36 | -0.1573  | 0.35956  | 0.628522 |   |
| UPDRS II           | total_light_nrem_time_hour  | 36 | -0.39119 | 0.018316 | 0.089039 |   |
| UPDRS II           | hourly_mean_pulse_rate      | 85 | 0.120705 | 0.271158 | 0.549034 |   |
| UPDRS II           | hourly_mean_rmssd           | 84 | -0.12668 | 0.250873 | 0.53323  |   |
| UPDRS II           | hourly_median_rmssd         | 84 | -0.13247 | 0.229673 | 0.518146 |   |

|               |                             |    |          |          |          |   |
|---------------|-----------------------------|----|----------|----------|----------|---|
| UPDRS II      | hourly_rmssd_variance       | 83 | -0.11072 | 0.319007 | 0.596794 |   |
| UPDRS III OFF | UPDRS III ON                | 67 | 0.835375 | 1.5E-18  | 2E-16    | * |
| UPDRS III OFF | UPDRS IV                    | 69 | 0.240909 | 0.046146 | 0.163888 |   |
| UPDRS III OFF | LEDD                        | 71 | 0.00769  | 0.949254 | 0.97262  |   |
| UPDRS III OFF | sum_walking_minutes         | 71 | -0.25165 | 0.034257 | 0.134205 |   |
| UPDRS III OFF | hourly_step_count_sum       | 71 | -0.33401 | 0.004418 | 0.035447 | * |
| UPDRS III OFF | sleep_efficiency            | 31 | -0.29004 | 0.113484 | 0.313611 |   |
| UPDRS III OFF | num_awakenings              | 31 | 0.024741 | 0.894895 | 0.94374  |   |
| UPDRS III OFF | total_sleep_time_hour       | 31 | -0.39134 | 0.029479 | 0.121942 |   |
| UPDRS III OFF | wake_after_sleep_onset_hour | 31 | 0.215544 | 0.244208 | 0.526267 |   |
| UPDRS III OFF | total_nrem_time_hour        | 31 | -0.42609 | 0.016844 | 0.084395 |   |
| UPDRS III OFF | total_rem_time_hour         | 31 | -0.20118 | 0.277815 | 0.549034 |   |
| UPDRS III OFF | total_deep_nrem_time_hour   | 31 | -0.31343 | 0.085986 | 0.259126 |   |
| UPDRS III OFF | total_light_nrem_time_hour  | 31 | -0.3678  | 0.041785 | 0.15375  |   |
| UPDRS III OFF | hourly_mean_pulse_rate      | 71 | 0.092183 | 0.444516 | 0.715091 |   |
| UPDRS III OFF | hourly_mean_rmssd           | 71 | -0.01666 | 0.890347 | 0.941371 |   |
| UPDRS III OFF | hourly_median_rmssd         | 71 | -0.06146 | 0.610616 | 0.811434 |   |
| UPDRS III OFF | hourly_rmssd_variance       | 70 | 0.091641 | 0.450542 | 0.718752 |   |
| UPDRS III ON  | UPDRS IV                    | 80 | 0.139887 | 0.215869 | 0.500935 |   |
| UPDRS III ON  | LEDD                        | 81 | 0.044194 | 0.695239 | 0.852724 |   |
| UPDRS III ON  | sum_walking_minutes         | 81 | -0.27912 | 0.011622 | 0.067221 |   |
| UPDRS III ON  | hourly_step_count_sum       | 81 | -0.35652 | 0.001087 | 0.012274 | * |
| UPDRS III ON  | sleep_efficiency            | 34 | -0.28168 | 0.106556 | 0.304485 |   |
| UPDRS III ON  | num_awakenings              | 34 | 0.144024 | 0.416429 | 0.690231 |   |
| UPDRS III ON  | total_sleep_time_hour       | 34 | -0.16295 | 0.357147 | 0.627599 |   |
| UPDRS III ON  | wake_after_sleep_onset_hour | 34 | 0.21083  | 0.231357 | 0.518801 |   |
| UPDRS III ON  | total_nrem_time_hour        | 34 | -0.1371  | 0.439407 | 0.710304 |   |
| UPDRS III ON  | total_rem_time_hour         | 34 | -0.14895 | 0.400485 | 0.670159 |   |
| UPDRS III ON  | total_deep_nrem_time_hour   | 34 | -0.02023 | 0.90957  | 0.953974 |   |
| UPDRS III ON  | total_light_nrem_time_hour  | 34 | -0.12917 | 0.466587 | 0.729716 |   |
| UPDRS III ON  | hourly_mean_pulse_rate      | 81 | 0.002723 | 0.980753 | 0.986679 |   |
| UPDRS III ON  | hourly_mean_rmssd           | 80 | 0.051187 | 0.652044 | 0.836727 |   |
| UPDRS III ON  | hourly_median_rmssd         | 80 | 0.027997 | 0.805277 | 0.890844 |   |
| UPDRS III ON  | hourly_rmssd_variance       | 79 | -0.05761 | 0.614058 | 0.811434 |   |
| UPDRS IV      | LEDD                        | 83 | 0.19974  | 0.070233 | 0.224879 |   |
| UPDRS IV      | sum_walking_minutes         | 83 | 0.066643 | 0.549434 | 0.783562 |   |
| UPDRS IV      | hourly_step_count_sum       | 83 | -0.04048 | 0.716331 | 0.863665 |   |
| UPDRS IV      | sleep_efficiency            | 36 | 0.167188 | 0.329754 | 0.603341 |   |
| UPDRS IV      | num_awakenings              | 36 | 0.38023  | 0.022164 | 0.100418 |   |
| UPDRS IV      | total_sleep_time_hour       | 36 | -0.05416 | 0.75374  | 0.881017 |   |
| UPDRS IV      | wake_after_sleep_onset_hour | 36 | 0.493341 | 0.002233 | 0.020946 | * |
| UPDRS IV      | total_nrem_time_hour        | 36 | -0.10866 | 0.528171 | 0.773103 |   |
| UPDRS IV      | total_rem_time_hour         | 36 | 0.108312 | 0.529486 | 0.773328 |   |
| UPDRS IV      | total_deep_nrem_time_hour   | 36 | -0.06691 | 0.698204 | 0.853533 |   |
| UPDRS IV      | total_light_nrem_time_hour  | 36 | -0.09364 | 0.587004 | 0.803773 |   |
| UPDRS IV      | hourly_mean_pulse_rate      | 83 | -0.10989 | 0.322671 | 0.601957 |   |

|                       |                             |    |          |          |          |   |
|-----------------------|-----------------------------|----|----------|----------|----------|---|
| UPDRS IV              | hourly_mean_rmssd           | 82 | 0.254034 | 0.02128  | 0.097741 |   |
| UPDRS IV              | hourly_median_rmssd         | 82 | 0.252581 | 0.022058 | 0.100418 |   |
| UPDRS IV              | hourly_rmssd_variance       | 81 | 0.048509 | 0.667161 | 0.845703 |   |
| LEDD                  | sum_walking_minutes         | 85 | 0.115091 | 0.294242 | 0.568101 |   |
| LEDD                  | hourly_step_count_sum       | 85 | 0.046833 | 0.670387 | 0.846118 |   |
| LEDD                  | sleep_efficiency            | 36 | 0.09645  | 0.575764 | 0.799067 |   |
| LEDD                  | num_awakenings              | 36 | 0.107591 | 0.532246 | 0.774157 |   |
| LEDD                  | total_sleep_time_hour       | 36 | 0.04679  | 0.786404 | 0.890844 |   |
| LEDD                  | wake_after_sleep_onset_hour | 36 | 0.079785 | 0.643686 | 0.830803 |   |
| LEDD                  | total_nrem_time_hour        | 36 | 0.069222 | 0.688304 | 0.849525 |   |
| LEDD                  | total_rem_time_hour         | 36 | -0.02957 | 0.864068 | 0.93118  |   |
| LEDD                  | total_deep_nrem_time_hour   | 36 | -0.09363 | 0.587025 | 0.803773 |   |
| LEDD                  | total_light_nrem_time_hour  | 36 | 0.09444  | 0.583783 | 0.803773 |   |
| LEDD                  | hourly_mean_pulse_rate      | 85 | -0.02695 | 0.806575 | 0.890844 |   |
| LEDD                  | hourly_mean_rmssd           | 84 | 0.068548 | 0.535542 | 0.774157 |   |
| LEDD                  | hourly_median_rmssd         | 84 | 0.057944 | 0.600594 | 0.811434 |   |
| LEDD                  | hourly_rmssd_variance       | 83 | -0.04457 | 0.689091 | 0.849525 |   |
| sum_walking_minutes   | hourly_step_count_sum       | 85 | 0.860102 | 5.52E-26 | 1.84E-23 | * |
| sum_walking_minutes   | sleep_efficiency            | 36 | 0.44389  | 0.00669  | 0.04843  | * |
| sum_walking_minutes   | num_awakenings              | 36 | 0.023784 | 0.890486 | 0.941371 |   |
| sum_walking_minutes   | total_sleep_time_hour       | 36 | 0.373928 | 0.024667 | 0.106997 |   |
| sum_walking_minutes   | wake_after_sleep_onset_hour | 36 | -0.14611 | 0.395159 | 0.664586 |   |
| sum_walking_minutes   | total_nrem_time_hour        | 36 | 0.415777 | 0.01167  | 0.067221 |   |
| sum_walking_minutes   | total_rem_time_hour         | 36 | 0.12047  | 0.48401  | 0.741036 |   |
| sum_walking_minutes   | total_deep_nrem_time_hour   | 36 | 0.031581 | 0.854922 | 0.925818 |   |
| sum_walking_minutes   | total_light_nrem_time_hour  | 36 | 0.415606 | 0.011708 | 0.067221 |   |
| sum_walking_minutes   | hourly_mean_pulse_rate      | 85 | 0.223679 | 0.039606 | 0.14819  |   |
| sum_walking_minutes   | hourly_mean_rmssd           | 84 | 0.133569 | 0.225792 | 0.51228  |   |
| sum_walking_minutes   | hourly_median_rmssd         | 84 | 0.149065 | 0.175958 | 0.443893 |   |
| sum_walking_minutes   | hourly_rmssd_variance       | 83 | 0.035744 | 0.748357 | 0.881017 |   |
| hourly_step_count_sum | sleep_efficiency            | 36 | 0.320028 | 0.057069 | 0.190993 |   |
| hourly_step_count_sum | num_awakenings              | 36 | -0.12816 | 0.45633  | 0.72189  |   |
| hourly_step_count_sum | total_sleep_time_hour       | 36 | 0.339985 | 0.042479 | 0.154755 |   |
| hourly_step_count_sum | wake_after_sleep_onset_hour | 36 | -0.30702 | 0.068551 | 0.220556 |   |
| hourly_step_count_sum | total_nrem_time_hour        | 36 | 0.345606 | 0.038965 | 0.146614 |   |
| hourly_step_count_sum | total_rem_time_hour         | 36 | 0.193733 | 0.257575 | 0.537759 |   |
| hourly_step_count_sum | total_deep_nrem_time_hour   | 36 | 0.047982 | 0.781095 | 0.890844 |   |
| hourly_step_count_sum | total_light_nrem_time_hour  | 36 | 0.339916 | 0.042523 | 0.154755 |   |
| hourly_step_count_sum | hourly_mean_pulse_rate      | 85 | 0.202555 | 0.063008 | 0.208773 |   |
| hourly_step_count_sum | hourly_mean_rmssd           | 84 | 0.126203 | 0.252657 | 0.533677 |   |
| hourly_step_count_sum | hourly_median_rmssd         | 84 | 0.149345 | 0.175137 | 0.443502 |   |
| hourly_step_count_sum | hourly_rmssd_variance       | 83 | 0.056524 | 0.611767 | 0.811434 |   |
| sleep_efficiency      | num_awakenings              | 36 | 0.285675 | 0.091227 | 0.27368  |   |
| sleep_efficiency      | total_sleep_time_hour       | 36 | 0.742396 | 2.18E-07 | 1.12E-05 | * |
| sleep_efficiency      | wake_after_sleep_onset_hour | 36 | -0.02578 | 0.881369 | 0.93745  |   |
| sleep_efficiency      | total_nrem_time_hour        | 36 | 0.706311 | 1.48E-06 | 4.94E-05 | * |

|                             |                             |    |          |          |          |   |
|-----------------------------|-----------------------------|----|----------|----------|----------|---|
| sleep_efficiency            | total_rem_time_hour         | 36 | 0.5486   | 0.000532 | 0.007376 | * |
| sleep_efficiency            | total_deep_nrem_time_hour   | 36 | 0.213475 | 0.211257 | 0.495413 |   |
| sleep_efficiency            | total_light_nrem_time_hour  | 36 | 0.665217 | 9.59E-06 | 0.000206 | * |
| sleep_efficiency            | hourly_mean_pulse_rate      | 36 | 0.046089 | 0.789535 | 0.890844 |   |
| sleep_efficiency            | hourly_mean_rmssd           | 36 | 0.086353 | 0.616531 | 0.813089 |   |
| sleep_efficiency            | hourly_median_rmssd         | 36 | 0.096794 | 0.574395 | 0.799067 |   |
| sleep_efficiency            | hourly_rmssd_variance       | 35 | 0.099066 | 0.571261 | 0.797609 |   |
| num_awakenings              | total_sleep_time_hour       | 36 | 0.350929 | 0.035859 | 0.13885  |   |
| num_awakenings              | wake_after_sleep_onset_hour | 36 | 0.575084 | 0.000244 | 0.003688 | * |
| num_awakenings              | total_nrem_time_hour        | 36 | 0.395049 | 0.0171   | 0.084395 |   |
| num_awakenings              | total_rem_time_hour         | 36 | 0.100482 | 0.559829 | 0.789928 |   |
| num_awakenings              | total_deep_nrem_time_hour   | 36 | -0.14938 | 0.384548 | 0.650055 |   |
| num_awakenings              | total_light_nrem_time_hour  | 36 | 0.440683 | 0.007145 | 0.051168 |   |
| num_awakenings              | hourly_mean_pulse_rate      | 36 | -0.07011 | 0.684516 | 0.849525 |   |
| num_awakenings              | hourly_mean_rmssd           | 36 | 0.075118 | 0.663261 | 0.843729 |   |
| num_awakenings              | hourly_median_rmssd         | 36 | 0.102755 | 0.550937 | 0.784026 |   |
| num_awakenings              | hourly_rmssd_variance       | 35 | -0.18221 | 0.294812 | 0.568101 |   |
| total_sleep_time_hour       | wake_after_sleep_onset_hour | 36 | -0.15278 | 0.373696 | 0.640542 |   |
| total_sleep_time_hour       | total_nrem_time_hour        | 36 | 0.962523 | 7.59E-21 | 1.26E-18 | * |
| total_sleep_time_hour       | total_rem_time_hour         | 36 | 0.710063 | 1.23E-06 | 4.56E-05 | * |
| total_sleep_time_hour       | total_deep_nrem_time_hour   | 36 | 0.275712 | 0.103607 | 0.29871  |   |
| total_sleep_time_hour       | total_light_nrem_time_hour  | 36 | 0.910404 | 1.38E-14 | 1.53E-12 | * |
| total_sleep_time_hour       | hourly_mean_pulse_rate      | 36 | -0.10566 | 0.539691 | 0.777015 |   |
| total_sleep_time_hour       | hourly_mean_rmssd           | 36 | 0.151682 | 0.377184 | 0.643748 |   |
| total_sleep_time_hour       | hourly_median_rmssd         | 36 | 0.174644 | 0.308326 | 0.5867   |   |
| total_sleep_time_hour       | hourly_rmssd_variance       | 35 | -0.13444 | 0.441301 | 0.711638 |   |
| wake_after_sleep_onset_hour | total_nrem_time_hour        | 36 | -0.10408 | 0.545794 | 0.781718 |   |
| wake_after_sleep_onset_hour | total_rem_time_hour         | 36 | -0.22007 | 0.197157 | 0.477479 |   |
| wake_after_sleep_onset_hour | total_deep_nrem_time_hour   | 36 | -0.3975  | 0.016364 | 0.084148 |   |
| wake_after_sleep_onset_hour | total_light_nrem_time_hour  | 36 | -0.00457 | 0.978883 | 0.986679 |   |
| wake_after_sleep_onset_hour | hourly_mean_pulse_rate      | 36 | -0.19103 | 0.26441  | 0.546885 |   |
| wake_after_sleep_onset_hour | hourly_mean_rmssd           | 36 | 0.071787 | 0.677365 | 0.84798  |   |
| wake_after_sleep_onset_hour | hourly_median_rmssd         | 36 | 0.110988 | 0.519303 | 0.768568 |   |
| wake_after_sleep_onset_hour | hourly_rmssd_variance       | 35 | -0.05616 | 0.748636 | 0.881017 |   |
| total_nrem_time_hour        | total_rem_time_hour         | 36 | 0.49249  | 0.002279 | 0.021078 | * |
| total_nrem_time_hour        | total_deep_nrem_time_hour   | 36 | 0.198924 | 0.244792 | 0.526267 |   |
| total_nrem_time_hour        | total_light_nrem_time_hour  | 36 | 0.968196 | 4.87E-22 | 1.08E-19 | * |
| total_nrem_time_hour        | hourly_mean_pulse_rate      | 36 | -0.08094 | 0.638875 | 0.827803 |   |
| total_nrem_time_hour        | hourly_mean_rmssd           | 36 | 0.229469 | 0.178217 | 0.446212 |   |
| total_nrem_time_hour        | hourly_median_rmssd         | 36 | 0.247339 | 0.145844 | 0.382411 |   |
| total_nrem_time_hour        | hourly_rmssd_variance       | 35 | -0.11821 | 0.498855 | 0.75243  |   |
| total_rem_time_hour         | total_deep_nrem_time_hour   | 36 | 0.368318 | 0.027087 | 0.114175 |   |
| total_rem_time_hour         | total_light_nrem_time_hour  | 36 | 0.407808 | 0.013554 | 0.075223 |   |
| total_rem_time_hour         | hourly_mean_pulse_rate      | 36 | -0.12891 | 0.45367  | 0.721107 |   |
| total_rem_time_hour         | hourly_mean_rmssd           | 36 | -0.10902 | 0.52678  | 0.772766 |   |
| total_rem_time_hour         | hourly_median_rmssd         | 36 | -0.08173 | 0.635598 | 0.826775 |   |

|                            |                            |    |          |          |            |
|----------------------------|----------------------------|----|----------|----------|------------|
| total_rem_time_hour        | hourly_rmssd_variance      | 35 | -0.12607 | 0.470515 | 0.729716   |
| total_deep_nrem_time_hour  | total_light_nrem_time_hour | 36 | -0.0526  | 0.760629 | 0.883703   |
| total_deep_nrem_time_hour  | hourly_mean_pulse_rate     | 36 | -0.02649 | 0.878137 | 0.93745    |
| total_deep_nrem_time_hour  | hourly_mean_rmssd          | 36 | -0.05429 | 0.753155 | 0.881017   |
| total_deep_nrem_time_hour  | hourly_median_rmssd        | 36 | -0.02732 | 0.874344 | 0.936195   |
| total_deep_nrem_time_hour  | hourly_rmssd_variance      | 35 | -0.05733 | 0.743589 | 0.881017   |
| total_light_nrem_time_hour | hourly_mean_pulse_rate     | 36 | -0.07571 | 0.660744 | 0.843627   |
| total_light_nrem_time_hour | hourly_mean_rmssd          | 36 | 0.247684 | 0.145265 | 0.382411   |
| total_light_nrem_time_hour | hourly_median_rmssd        | 36 | 0.259007 | 0.127169 | 0.345691   |
| total_light_nrem_time_hour | hourly_rmssd_variance      | 35 | -0.10658 | 0.542263 | 0.778335   |
| hourly_mean_pulse_rate     | hourly_mean_rmssd          | 84 | -0.21289 | 0.051858 | 0.177419   |
| hourly_mean_pulse_rate     | hourly_median_rmssd        | 84 | -0.1949  | 0.075634 | 0.236489   |
| hourly_mean_pulse_rate     | hourly_rmssd_variance      | 83 | 0.080936 | 0.466999 | 0.729716   |
| hourly_mean_rmssd          | hourly_median_rmssd        | 84 | 0.981818 | 5.98E-61 | 3.98E-58 * |
| hourly_mean_rmssd          | hourly_rmssd_variance      | 83 | 0.246391 | 0.024741 | 0.106997   |
| hourly_median_rmssd        | hourly_rmssd_variance      | 83 | 0.176002 | 0.111478 | 0.310646   |

### Supplemental Table 3: Performance of digital weekly averages predicting clinical assessments

Results of the predictive modelling of clinical scores from digital weekly averages. For each clinical score the baseline R2 performance and the performance of the model using the digital markers as features are shown as mean R2 and standard deviation. The results of the two-sided T-test comparing the 5-fold cross-validation R2 performances between baseline and fitted model are shown with the t statistic and the associated p-value.

|                  | T        | dof | alternative | p-value  | CI              | cohen-d  | BF10   | power    | sign | mean R2  | std R2   | baseline mean R2 | baseline std R2 |
|------------------|----------|-----|-------------|----------|-----------------|----------|--------|----------|------|----------|----------|------------------|-----------------|
| updrs_ii         | 4.566502 | 8   | two-sided   | 0.001834 | [0.05<br>0.16]  | 2.888109 | 17.344 | 0.977874 | *    | 0.052973 | 0.022328 | -0.05163         | 0.040002        |
| updrs_iii_OFF    | 0.505877 | 8   | two-sided   | 0.626585 | [-0.15<br>0.23] | 0.319945 | 0.533  | 0.073301 |      | -0.06832 | 0.113608 | -0.10964         | 0.117366        |
| semantic_fluency | 0.40614  | 8   | two-sided   | 0.695286 | [-0.13<br>0.19] | 0.256866 | 0.519  | 0.06496  |      | 0.118057 | 0.110473 | 0.089288         | 0.08869         |
| moca             | 0.156266 | 8   | two-sided   | 0.879695 | [-0.08<br>0.09] | 0.098831 | 0.496  | 0.0522   |      | -0.0099  | 0.031966 | -0.01557         | 0.065086        |
| benton           | 0.117451 | 8   | two-sided   | 0.909398 | [-0.27<br>0.29] | 0.074283 | 0.495  | 0.051242 |      | -0.29576 | 0.171833 | -0.30998         | 0.170644        |
| Ins              | 1.696765 | 8   | two-sided   | 0.128179 | [-0.01<br>0.09] | 1.073128 | 1.086  | 0.321514 |      | 0.076919 | 0.042837 | 0.036734         | 0.020215        |
| hvlr_recall      | 1.349826 | 8   | two-sided   | 0.21402  | [-0.05<br>0.2 ] | 0.853705 | 0.832  | 0.222007 |      | -0.07342 | 0.0777   | -0.14752         | 0.077559        |
| hvlr_recognition | -0.16991 | 8   | two-sided   | 0.869303 | [-0.1<br>0.08]  | 0.107457 | 0.497  | 0.052602 |      | -0.11071 | 0.053449 | -0.10417         | 0.055502        |
| hvlr_retention   | 0.741629 | 8   | two-sided   | 0.479515 | [-0.17<br>0.33] | 0.469048 | 0.583  | 0.10064  |      | -0.17287 | 0.100905 | -0.25354         | 0.192728        |
| symbol_digit     | -0.19545 | 8   | two-sided   | 0.849914 | [-0.29<br>0.24] | 0.123613 | 0.498  | 0.053444 |      | -0.15414 | 0.171061 | -0.13166         | 0.153899        |
| stai_trait       | -0.04991 | 8   | two-sided   | 0.961414 | [-0.13<br>0.13] | 0.031569 | 0.493  | 0.050224 |      | -0.09327 | 0.082201 | -0.09045         | 0.077069        |
| stai_state       | 0.175233 | 8   | two-sided   | 0.865251 | [-0.23<br>0.27] | 0.110827 | 0.497  | 0.052768 |      | -0.126   | 0.139052 | -0.14482         | 0.163668        |

|                  |          |   |           |          |                  |          |        |            |          |          |          |          |
|------------------|----------|---|-----------|----------|------------------|----------|--------|------------|----------|----------|----------|----------|
| gds              | 0        | 8 | two-sided | 1        | [-0.08<br>0.08]  | 0        | 0.492  | 0.05       | -0.11166 | 0.051324 | -0.11166 | 0.051324 |
| quip             | -0.22617 | 8 | two-sided | 0.826741 | [0.28]<br>[0.05] | 0.143042 | 0.5    | 0.054615   | -0.18318 | 0.194604 | -0.15266 | 0.187054 |
| epworth          | 4.537698 | 8 | two-sided | 0.001905 | 0.14]<br>[-0.15] | 2.869892 | 16.866 | 0.976548 * | -0.00021 | 0.03146  | -0.09265 | 0.025892 |
| rbd              | -0.07926 | 8 | two-sided | 0.938776 | 0.14]<br>[-0.11] | 0.050125 | 0.493  | 0.050565   | -0.06457 | 0.087226 | -0.05958 | 0.090931 |
| systolic_bp_drop | 0.021092 | 8 | two-sided | 0.983689 | 0.11]<br>[-0.19] | 0.01334  | 0.492  | 0.05004    | -0.00952 | 0.071395 | -0.01053 | 0.063237 |
| scopa_aut        | 0.136293 | 8 | two-sided | 0.894957 | 0.21]<br>[-0.02] | 0.086199 | 0.495  | 0.051673   | -0.15211 | 0.12849  | -0.16401 | 0.118251 |
| se_adl           | 1.868912 | 8 | two-sided | 0.098572 | 0.16]<br>[-0.07] | 1.182004 | 1.255  | 0.376983   | -0.09863 | 0.059547 | -0.17237 | 0.051792 |
| updrs_i          | 0        | 8 | two-sided | 1        | 0.07]<br>[-0.18] | 0        | 0.492  | 0.05       | -0.06818 | 0.041239 | -0.06818 | 0.041239 |
| LEDD             | -0.3386  | 8 | two-sided | 0.743627 | 0.14]<br>[-0.08] | 0.214149 | 0.51   | 0.060374   | -0.15819 | 0.105542 | -0.13481 | 0.089034 |
| updrs_iii_ON     | 1.109388 | 8 | two-sided | 0.299495 | 0.22]<br>[-0.42] | 0.701639 | 0.709  | 0.165325   | 0.034923 | 0.117938 | -0.03667 | 0.052421 |
| updrs_iv         | 0.318007 | 8 | two-sided | 0.758622 | 0.55]            | 0.201125 | 0.508  | 0.059145   | -0.18498 | 0.293981 | -0.25223 | 0.304119 |

#### Supplemental Table 4: Amount of change between clinic visits

For each clinical measure and digital weekly average, the amount of change between visits is quantified with cohen's d, significance tests between visits are reported with two-sided t-tests.

| feature          | T        | dof | alternative | p-val    | CI95%             | cohen-d  | BF10   | power    | hedges g | category |
|------------------|----------|-----|-------------|----------|-------------------|----------|--------|----------|----------|----------|
| semantic_fluency | -1.69002 | 21  | two-sided   | 0.105816 | [-7.81<br>0.81]   | 0.207066 | 0.757  | 0.152831 | 0.203346 | clinical |
| moca             | -0.81295 | 21  | two-sided   | 0.425368 | [-1.13<br>0.5 ]   | 0.12239  | 0.3    | 0.085082 | 0.120191 | clinical |
| benton           | -0.19558 | 21  | two-sided   | 0.846819 | [-0.53<br>0.44]   | 0.025273 | 0.227  | 0.05147  | 0.024819 | clinical |
| lns              | -1.17611 | 21  | two-sided   | 0.252712 | [-1.38<br>0.38]   | 0.190386 | 0.411  | 0.136541 | 0.186965 | clinical |
| hvlr_recall      | -3.35808 | 21  | two-sided   | 0.002977 | [-4.12 -<br>0.97] | 0.440343 | 13.911 | 0.504282 | 0.432432 | clinical |

|                             |          |    |           |          |                        |          |        |          |          |          |
|-----------------------------|----------|----|-----------|----------|------------------------|----------|--------|----------|----------|----------|
| hvt_recognition             | -0.28257 | 21 | two-sided | 0.78027  | [-0.76<br>0.58]        | 0.031854 | 0.231  | 0.052336 | 0.031282 | clinical |
| hvt_retention               | 0.608412 | 21 | two-sided | 0.549439 | [-0.07<br>0.12]        | 0.114167 | 0.264  | 0.080461 | 0.112116 | clinical |
| symbol_digit                | -1.50966 | 21 | two-sided | 0.146031 | [-3.03<br>0.48]        | 0.101085 | 0.598  | 0.073802 | 0.099269 | clinical |
| stai_trait                  | -0.63983 | 22 | two-sided | 0.528893 | [-1.84<br>0.97]        | 0.047186 | 0.263  | 0.055391 | 0.046377 | clinical |
| stai_state                  | 1.095844 | 22 | two-sided | 0.284999 | [-0.78<br>2.52]        | 0.07656  | 0.373  | 0.064263 | 0.075247 | clinical |
| gds                         | 1.335223 | 22 | two-sided | 0.195456 | [-0.24<br>1.11]        | 0.13639  | 0.479  | 0.095959 | 0.134052 | clinical |
| quip                        | 0        | 22 | two-sided | 1        | [-0.26<br>0.26]        | 0        | 0.219  | 0.05     | 0        | clinical |
| epworth                     | -0.17301 | 22 | two-sided | 0.864227 | [-1.13<br>0.96]        | 0.020036 | 0.222  | 0.050969 | 0.019692 | clinical |
| rbd                         | 0.416404 | 22 | two-sided | 0.681149 | [-0.87<br>1.3 ]        | 0.072792 | 0.237  | 0.062884 | 0.071544 | clinical |
| systolic_bp_drop            | -0.9351  | 34 | two-sided | 0.356331 | [-19.31<br>7.14]       | 0.202009 | 0.272  | 0.213206 | 0.199773 | clinical |
| scopa_aut                   | 1.251711 | 22 | two-sided | 0.223821 | [-0.49<br>1.96]        | 0.120661 | 0.437  | 0.08581  | 0.118593 | clinical |
| se_adl                      | -1.4676  | 34 | two-sided | 0.151404 | [-4.77<br>0.77]        | 0.183168 | 0.482  | 0.183563 | 0.181141 | clinical |
| updrs_i                     | -1.13044 | 34 | two-sided | 0.266203 | [-2.16<br>0.62]        | 0.137403 | 0.326  | 0.12401  | 0.135882 | clinical |
| updrs_ii                    | 0.804133 | 34 | two-sided | 0.426907 | [-0.79<br>1.81]        | 0.080357 | 0.245  | 0.074801 | 0.079467 | clinical |
| updrs_iii_OFF               | -0.87999 | 21 | two-sided | 0.388824 | [-3.97<br>1.61]        | 0.07718  | 0.315  | 0.063804 | 0.075794 | clinical |
| updrs_iii_ON                | 1.118151 | 32 | two-sided | 0.271827 | [-1.34<br>4.62]        | 0.140179 | 0.33   | 0.122329 | 0.13853  | clinical |
| updrs_iv                    | 1.168987 | 33 | two-sided | 0.250784 | [-0.48<br>1.77]        | 0.203443 | 0.344  | 0.210464 | 0.201122 | clinical |
| LEDD                        | 3.176262 | 34 | two-sided | 0.003167 | [ 58.68<br>267.17]     | 0.237338 | 11.513 | 0.276237 | 0.234711 | clinical |
| sum_walking_minutes         | -1.08132 | 34 | two-sided | 0.287163 | [-0.91<br>0.28]        | 0.153788 | 0.311  | 0.143268 | 0.152086 | digital  |
| hourly_step_count_sum       | -2.07429 | 34 | two-sided | 0.045693 | [-<br>118.08<br>-1.21] | 0.235175 | 1.212  | 0.272118 | 0.232572 | digital  |
| sleep_efficiency            | 1.23733  | 12 | two-sided | 0.23963  | [-0.06<br>0.2 ]        | 0.314774 | 0.524  | 0.181647 | 0.304834 | digital  |
| num_awakenings              | 1.053825 | 12 | two-sided | 0.31272  | [-0.73<br>2.1 ]        | 0.359827 | 0.444  | 0.222987 | 0.348464 | digital  |
| total_sleep_time_hour       | 1.048942 | 12 | two-sided | 0.314872 | [-0.48<br>1.38]        | 0.358766 | 0.442  | 0.221952 | 0.347437 | digital  |
| wake_after_sleep_onset_hour | 0.116099 | 12 | two-sided | 0.909494 | [-0.28<br>0.31]        | 0.04405  | 0.28   | 0.052464 | 0.042659 | digital  |
| total_nrem_time_hour        | 0.677506 | 12 | two-sided | 0.510936 | [-0.49<br>0.94]        | 0.195161 | 0.339  | 0.099461 | 0.188998 | digital  |
| total_rem_time_hour         | 1.785076 | 12 | two-sided | 0.099527 | [-0.05<br>0.5 ]        | 0.626483 | 0.963  | 0.546441 | 0.606699 | digital  |
| total_deep_nrem_time_hour   | 1.903721 | 12 | two-sided | 0.0812   | [-0.02<br>0.27]        | 0.397333 | 1.119  | 0.261402 | 0.384785 | digital  |
| total_light_nrem_time_hour  | 0.269314 | 12 | two-sided | 0.792263 | [-0.69<br>0.88]        | 0.080628 | 0.287  | 0.058281 | 0.078082 | digital  |

|                        |          |    |           |          |                  |          |       |          |          |         |
|------------------------|----------|----|-----------|----------|------------------|----------|-------|----------|----------|---------|
| hourly_mean_pulse_rate | -0.59484 | 34 | two-sided | 0.555886 | [-1.96<br>1.07]  | 0.037315 | 0.214 | 0.055292 | 0.036902 | digital |
| hourly_mean_rmssd      | 1.075409 | 34 | two-sided | 0.289764 | [-0.67<br>2.17]  | 0.19637  | 0.309 | 0.20403  | 0.194196 | digital |
| hourly_median_rmssd    | 0.743684 | 34 | two-sided | 0.462176 | [-0.88<br>1.9]   | 0.133669 | 0.234 | 0.119944 | 0.132189 | digital |
| hourly_rmssd_variance  | 1.896054 | 32 | two-sided | 0.067014 | [-0.57<br>15.94] | 0.319005 | 0.915 | 0.427707 | 0.315252 | digital |

**Supplemental Table 5: Association between rate of change between clinic visits**

Results of the Pearson correlation analysis between the rate of change in clinical and in digital markers. The Pearson’s r coefficient, the associated p-value, the FDR corrected p-value, and the sample size is displayed.

| f1               | f2                       | N  | pearson r | p-value |
|------------------|--------------------------|----|-----------|---------|
| Semantic Fluency | Semantic Fluency         |    |           | 0.93506 |
| Semantic Fluency | MOCA                     | 10 | -0.02971  | 4       |
| Semantic Fluency | Benton                   | 10 | -0.08715  | 8       |
| Semantic Fluency | Letter Number Sequencing | 10 | -0.19901  | 8       |
| Semantic Fluency | HVLT Recall              | 10 | 0.43218   | 0.21227 |
| Semantic Fluency | HVLT Recognition         | 10 | 1         | 6       |
| Semantic Fluency | HVLT Retention           | 10 | -0.20997  | 8       |
| Semantic Fluency | Symbol Digit             | 10 | -0.09308  | 6       |
| Semantic Fluency | STAI trait               | 10 | -0.1787   | 0.62133 |
| Semantic Fluency | STAI state               | 10 | 0.15847   | 3       |
| Semantic Fluency | GDS                      | 10 | -0.31079  | 9       |
| Semantic Fluency | QUIP                     | 10 | 0.22880   | 0.52488 |
| Semantic Fluency | ESS                      | 10 | 1         | 6       |
| Semantic Fluency | RBDSQ                    | 10 | -0.15074  | 7       |
| Semantic Fluency | Systolic BP Drop         | 10 | -0.42505  | 7       |
| Semantic Fluency |                          | 10 | -0.59144  | 0.07171 |
| Semantic Fluency |                          | 10 | -0.27487  | 5       |
| Semantic Fluency |                          | 10 |           | 0.44212 |
| Semantic Fluency |                          | 10 |           | 9       |



|                  |                             |    |          |         |
|------------------|-----------------------------|----|----------|---------|
|                  |                             |    |          | 0.88898 |
| Semantic Fluency | SCOPA autonome              | 10 | 0.05088  | 8       |
|                  |                             |    |          | 0.41868 |
| Semantic Fluency | Schwab England ADL          | 10 | -0.2886  | 7       |
|                  |                             |    | 0.14954  | 0.68009 |
| Semantic Fluency | UPDRS I                     | 10 | 2        | 5       |
|                  |                             |    | 0.37017  | 0.29237 |
| Semantic Fluency | UPDRS II                    | 10 | 5        | 7       |
|                  |                             |    |          | 0.30318 |
| Semantic Fluency | UPDRS III OFF               | 8  | -0.41767 | 5       |
|                  |                             |    |          | 0.64849 |
| Semantic Fluency | UPDRS III ON                | 10 | -0.16512 | 2       |
|                  |                             |    | 0.06294  | 0.86285 |
| Semantic Fluency | UPDRS IV                    | 10 | 2        | 9       |
| Semantic Fluency | LEDD                        | 9  | -0.37688 | 0.31739 |
|                  |                             |    |          | 0.65193 |
| Semantic Fluency | sum_walking_minutes         | 10 | -0.16341 | 9       |
|                  |                             |    | 0.01020  |         |
| Semantic Fluency | hourly_step_count_sum       | 8  | 4        | 0.98087 |
| Semantic Fluency | sleep_efficiency            | 1  |          |         |
| Semantic Fluency | num_awakenings              | 1  |          |         |
| Semantic Fluency | total_sleep_time_hour       | 1  |          |         |
|                  | wake_after_sleep_onset_hour |    |          |         |
| Semantic Fluency | r                           | 1  |          |         |
| Semantic Fluency | total_nrem_time_hour        | 1  |          |         |
| Semantic Fluency | total_rem_time_hour         | 1  |          |         |
| Semantic Fluency | total_deep_nrem_time_hour   | 1  |          |         |
| Semantic Fluency | total_light_nrem_time_hour  | 1  |          |         |
|                  |                             |    |          | 0.27834 |
| Semantic Fluency | hourly_mean_pulse_rate      | 8  | -0.4375  | 7       |
|                  |                             |    |          | 0.21815 |
| Semantic Fluency | hourly_mean_rmssd           | 7  | -0.53285 | 8       |
|                  |                             |    |          | 0.21076 |
| Semantic Fluency | hourly_median_rmssd         | 7  | -0.54009 | 5       |
| Semantic Fluency | hourly_rmssd_variance       | 5  | -0.73223 | 0.15948 |
| MOCA             | Semantic Fluency            |    |          |         |
| MOCA             | MOCA                        |    |          |         |
|                  |                             |    |          | 0.18701 |
| MOCA             | Benton                      | 10 | -0.45444 | 5       |
|                  |                             |    | 0.35084  | 0.32021 |
| MOCA             | Letter Number Sequencing    | 10 | 9        | 9       |
|                  |                             |    | 0.37681  | 0.28312 |
| MOCA             | HVLT Recall                 | 10 | 1        | 8       |
|                  |                             |    | 0.66898  | 0.03440 |
| MOCA             | HVLT Recognition            | 10 | 1        | 4       |
|                  |                             |    | 0.65253  | 0.04083 |
| MOCA             | HVLT Retention              | 10 | 8        | 9       |
|                  |                             |    | 0.82616  | 0.00322 |
| MOCA             | Symbol Digit                | 10 | 1        | 1       |

|      |                             |    |          |   |         |
|------|-----------------------------|----|----------|---|---------|
| MOCA | STAI trait                  | 10 | -0.61691 | 4 | 0.05744 |
| MOCA | STAI state                  | 10 | -0.74081 | 2 | 0.01424 |
| MOCA | GDS                         | 10 | -0.12996 | 9 | 0.72045 |
| MOCA | QUIP                        | 10 | -0.16611 | 8 | 0.64648 |
| MOCA | ESS                         | 10 | 0.49655  | 7 | 0.14431 |
| MOCA | RBDSQ                       | 10 | 2        | 5 | 0.99713 |
| MOCA | Systolic BP Drop            | 10 | -0.00131 | 5 | 0.26034 |
| MOCA | SCOPA autonome              | 10 | -0.39368 | 5 | 0.06639 |
| MOCA | Schwab England ADL          | 10 | 5        | 7 | 0.8554  |
| MOCA | UPDRS I                     | 10 | -0.15877 | 9 | 0.66130 |
| MOCA | UPDRS II                    | 10 | 0.57154  | 9 | 0.08433 |
| MOCA | UPDRS III OFF               | 10 | 0.14960  | 9 | 0.67995 |
| MOCA | UPDRS III ON                | 8  | 8        | 2 | 0.42784 |
| MOCA | UPDRS IV                    | 10 | -0.3279  | 2 | 0.30013 |
| MOCA | LEDD                        | 9  | -0.3647  | 9 | 0.56168 |
| MOCA | sum_walking_minutes         | 10 | 0.20930  | 2 | 0.35302 |
| MOCA | hourly_step_count_sum       | 8  | 0.35190  | 3 | 0.45156 |
| MOCA | sleep_efficiency            | 1  | -0.26944 | 3 | 0.51105 |
| MOCA | num_awakenings              | 1  | -0.27421 | 3 |         |
| MOCA | total_sleep_time_hour       | 1  |          |   |         |
| MOCA | wake_after_sleep_onset_hour | 1  |          |   |         |
| MOCA | total_nrem_time_hour        | 1  |          |   |         |
| MOCA | total_rem_time_hour         | 1  |          |   |         |
| MOCA | total_deep_nrem_time_hour   | 1  |          |   |         |
| MOCA | total_light_nrem_time_hour  | 1  |          |   |         |
| MOCA | hourly_mean_pulse_rate      | 8  | 0.12869  | 5 | 0.76135 |
| MOCA | hourly_mean_rmssd           | 7  | 1        | 5 | 0.17756 |
| MOCA | hourly_median_rmssd         | 7  | -0.57425 | 6 | 0.19767 |
| MOCA | hourly_rmssd_variance       | 5  | -0.55322 | 6 | 0.70611 |
| MOCA |                             | 5  | -0.23294 | 6 |         |

|        |                             |    |          |         |
|--------|-----------------------------|----|----------|---------|
| Benton | Semantic Fluency            |    |          |         |
| Benton | MOCA                        |    |          |         |
| Benton | Benton                      |    |          |         |
|        |                             |    | 0.38024  |         |
| Benton | Letter Number Sequencing    | 10 | 1        | 0.27841 |
|        |                             |    |          | 0.92148 |
| Benton | HVLT Recall                 | 10 | -0.03594 | 9       |
|        |                             |    |          | 0.93308 |
| Benton | HVLT Recognition            | 10 | 0.03062  | 1       |
| Benton | HVLT Retention              | 10 | -0.04206 | 0.90815 |
|        |                             |    |          | 0.28914 |
| Benton | Symbol Digit                | 10 | -0.37248 | 4       |
|        |                             |    | 0.22765  | 0.52701 |
| Benton | STAI trait                  | 10 | 9        | 5       |
|        |                             |    | 0.25394  | 0.47895 |
| Benton | STAI state                  | 10 | 2        | 9       |
|        |                             |    |          | 0.62990 |
| Benton | GDS                         | 10 | -0.17439 | 5       |
|        |                             |    | 0.39503  | 0.25855 |
| Benton | QUIP                        | 10 | 7        | 3       |
|        |                             |    |          | 0.40964 |
| Benton | ESS                         | 10 | -0.294   | 1       |
|        |                             |    |          | 0.30343 |
| Benton | RBDSQ                       | 10 | -0.36239 | 1       |
|        |                             |    |          | 0.89373 |
| Benton | Systolic BP Drop            | 10 | -0.04869 | 4       |
| Benton | SCOPA autonome              | 10 | -0.68083 | 0.03022 |
|        |                             |    | 0.33584  | 0.34274 |
| Benton | Schwab England ADL          | 10 | 6        | 4       |
|        |                             |    |          | 0.96381 |
| Benton | UPDRS I                     | 10 | -0.01654 | 8       |
|        |                             |    |          | 0.27889 |
| Benton | UPDRS II                    | 10 | -0.37989 | 6       |
|        |                             |    | 0.15465  | 0.71461 |
| Benton | UPDRS III OFF               | 8  | 3        | 6       |
|        |                             |    | 0.80530  | 0.00493 |
| Benton | UPDRS III ON                | 10 | 4        | 4       |
|        |                             |    |          | 0.15742 |
| Benton | UPDRS IV                    | 10 | -0.48291 | 4       |
|        |                             |    |          | 0.83240 |
| Benton | LEDD                        | 9  | -0.08274 | 4       |
|        |                             |    | 0.68486  | 0.02887 |
| Benton | sum_walking_minutes         | 10 | 8        | 7       |
|        |                             |    | 0.14126  | 0.73862 |
| Benton | hourly_step_count_sum       | 8  | 7        | 7       |
| Benton | sleep_efficiency            | 1  |          |         |
| Benton | num_awakenings              | 1  |          |         |
| Benton | total_sleep_time_hour       | 1  |          |         |
| Benton | wake_after_sleep_onset_hour | 1  |          |         |

|                          |                            |    |          |         |
|--------------------------|----------------------------|----|----------|---------|
| Benton                   | total_nrem_time_hour       | 1  |          |         |
| Benton                   | total_rem_time_hour        | 1  |          |         |
| Benton                   | total_deep_nrem_time_hour  | 1  |          |         |
| Benton                   | total_light_nrem_time_hour | 1  |          |         |
|                          |                            |    | 0.08790  | 0.83602 |
| Benton                   | hourly_mean_pulse_rate     | 8  | 3        | 9       |
|                          |                            |    | 0.48979  | 0.26453 |
| Benton                   | hourly_mean_rmssd          | 7  | 7        | 5       |
|                          |                            |    | 0.40117  | 0.37239 |
| Benton                   | hourly_median_rmssd        | 7  | 7        | 7       |
|                          |                            |    | 0.00772  | 0.99016 |
| Benton                   | hourly_rmssd_variance      | 5  | 3        | 6       |
| Letter Number Sequencing | Semantic Fluency           |    |          |         |
| Letter Number Sequencing | MOCA                       |    |          |         |
| Letter Number Sequencing | Benton                     |    |          |         |
| Letter Number Sequencing | Letter Number Sequencing   |    |          |         |
|                          |                            |    |          | 0.94219 |
| Letter Number Sequencing | HVLT Recall                | 10 | -0.02644 | 3       |
|                          |                            |    | 0.25499  | 0.47707 |
| Letter Number Sequencing | HVLT Recognition           | 10 | 3        | 9       |
|                          |                            |    | 0.32407  | 0.36096 |
| Letter Number Sequencing | HVLT Retention             | 10 | 7        | 3       |
|                          |                            |    | 0.54858  | 0.10057 |
| Letter Number Sequencing | Symbol Digit               | 10 | 2        | 8       |
|                          |                            |    |          | 0.40144 |
| Letter Number Sequencing | STAI trait                 | 10 | -0.29894 | 7       |
|                          |                            |    |          | 0.71549 |
| Letter Number Sequencing | STAI state                 | 10 | -0.13236 | 2       |
|                          |                            |    |          | 0.39153 |
| Letter Number Sequencing | GDS                        | 10 | -0.30497 | 9       |
|                          |                            |    | 0.10589  | 0.77093 |
| Letter Number Sequencing | QUIP                       | 10 | 4        | 6       |
|                          |                            |    |          | 0.59383 |
| Letter Number Sequencing | ESS                        | 10 | 0.19267  | 4       |
|                          |                            |    |          | 0.90041 |
| Letter Number Sequencing | RBDSQ                      | 10 | -0.04562 | 1       |
| Letter Number Sequencing | Systolic BP Drop           | 10 | -0.35941 | 0.30772 |
| Letter Number Sequencing | SCOPA autonome             | 10 | -0.67134 | 0.03354 |
|                          |                            |    | 0.38805  | 0.26782 |
| Letter Number Sequencing | Schwab England ADL         | 10 | 4        | 4       |
|                          |                            |    | 0.42982  | 0.21506 |
| Letter Number Sequencing | UPDRS I                    | 10 | 1        | 3       |
|                          |                            |    |          | 0.42431 |
| Letter Number Sequencing | UPDRS II                   | 10 | -0.28528 | 4       |
|                          |                            |    |          | 0.17413 |
| Letter Number Sequencing | UPDRS III OFF              | 8  | -0.53262 | 1       |
|                          |                            |    | 0.31605  | 0.37364 |
| Letter Number Sequencing | UPDRS III ON               | 10 | 8        | 6       |
|                          |                            |    |          | 0.03105 |
| Letter Number Sequencing | UPDRS IV                   | 10 | -0.67839 | 3       |

|                          |                             |    |          |         |   |
|--------------------------|-----------------------------|----|----------|---------|---|
| Letter Number Sequencing | LEDD                        | 9  | -0.06796 | 0.86208 | 6 |
|                          |                             |    | 0.32942  | 0.35262 |   |
| Letter Number Sequencing | sum_walking_minutes         | 10 | 2        |         | 9 |
|                          |                             |    | 0.24907  | 0.55193 |   |
| Letter Number Sequencing | hourly_step_count_sum       | 8  | 7        |         | 7 |
| Letter Number Sequencing | sleep_efficiency            | 1  |          |         |   |
| Letter Number Sequencing | num_awakenings              | 1  |          |         |   |
| Letter Number Sequencing | total_sleep_time_hour       | 1  |          |         |   |
| Letter Number Sequencing | wake_after_sleep_onset_hour | 1  |          |         |   |
| Letter Number Sequencing | total_nrem_time_hour        | 1  |          |         |   |
| Letter Number Sequencing | total_rem_time_hour         | 1  |          |         |   |
| Letter Number Sequencing | total_deep_nrem_time_hour   | 1  |          |         |   |
| Letter Number Sequencing | total_light_nrem_time_hour  | 1  |          |         |   |
| Letter Number Sequencing | hourly_mean_pulse_rate      | 8  | -0.30616 | 0.46082 |   |
|                          |                             |    | 0.20603  |         |   |
| Letter Number Sequencing | hourly_mean_rmssd           | 7  | 5        | 0.6576  |   |
|                          |                             |    | 0.12690  |         |   |
| Letter Number Sequencing | hourly_median_rmssd         | 7  | 5        | 0.78629 |   |
|                          |                             |    | 0.33046  | 0.58702 |   |
| Letter Number Sequencing | hourly_rmssd_variance       | 5  | 6        |         | 6 |
| HVLT Recall              | Semantic Fluency            |    |          |         |   |
| HVLT Recall              | MOCA                        |    |          |         |   |
| HVLT Recall              | Benton                      |    |          |         |   |
| HVLT Recall              | Letter Number Sequencing    |    |          |         |   |
| HVLT Recall              | HVLT Recall                 |    |          | 0.21722 |   |
| HVLT Recall              | HVLT Recognition            | 10 | 2        | 0.54662 |   |
|                          |                             |    | 0.60421  | 0.06430 |   |
| HVLT Recall              | HVLT Retention              | 10 | 2        |         | 1 |
|                          |                             |    |          | 0.82678 |   |
| HVLT Recall              | Symbol Digit                | 10 | 0.07969  |         | 1 |
|                          |                             |    |          | 0.09084 |   |
| HVLT Recall              | STAI trait                  | 10 | -0.56203 |         | 2 |
|                          |                             |    |          | 0.08628 |   |
| HVLT Recall              | STAI state                  | 10 | -0.56865 |         | 6 |
|                          |                             |    |          | 0.51819 |   |
| HVLT Recall              | GDS                         | 10 | -0.2324  |         | 9 |
|                          |                             |    | 0.04048  | 0.91158 |   |
| HVLT Recall              | QUIP                        | 10 | 7        |         | 1 |
|                          |                             |    |          | 0.89325 |   |
| HVLT Recall              | ESS                         | 10 | -0.04891 |         | 8 |
|                          |                             |    |          | 0.14977 |   |
| HVLT Recall              | RBDSQ                       | 10 | -0.49078 |         | 6 |
|                          |                             |    |          | 0.01684 |   |
| HVLT Recall              | Systolic BP Drop            | 10 | -0.7286  |         | 6 |
|                          |                             |    | 0.08080  | 0.82439 |   |
| HVLT Recall              | SCOPA autonome              | 10 | 2        |         | 4 |

|                  |                             |    |          |   |         |
|------------------|-----------------------------|----|----------|---|---------|
| HVLT Recall      | Schwab England ADL          | 10 | -0.26114 | 9 | 0.46613 |
| HVLT Recall      | UPDRS I                     | 10 | 0.22775  | 4 | 0.52684 |
| HVLT Recall      | UPDRS II                    | 10 | 0.15655  | 7 | 0.66581 |
| HVLT Recall      | UPDRS III OFF               | 8  | -0.1315  | 2 | 0.75627 |
| HVLT Recall      | UPDRS III ON                | 10 | 0.10120  | 6 | 0.78087 |
| HVLT Recall      | UPDRS IV                    | 10 | 0.21519  | 6 | 0.55046 |
| HVLT Recall      | LEDD                        | 9  | 0.07141  | 5 | 0.85513 |
| HVLT Recall      | sum_walking_minutes         | 10 | 0.19902  | 5 | 0.58147 |
| HVLT Recall      | hourly_step_count_sum       | 8  | -0.16656 | 5 | 1       |
| HVLT Recall      | sleep_efficiency            | 1  |          |   | 0.69342 |
| HVLT Recall      | num_awakenings              | 1  |          |   |         |
| HVLT Recall      | total_sleep_time_hour       | 1  |          |   |         |
| HVLT Recall      | wake_after_sleep_onset_hour | 1  |          |   |         |
| HVLT Recall      | total_nrem_time_hour        | 1  |          |   |         |
| HVLT Recall      | total_rem_time_hour         | 1  |          |   |         |
| HVLT Recall      | total_deep_nrem_time_hour   | 1  |          |   |         |
| HVLT Recall      | total_light_nrem_time_hour  | 1  |          |   |         |
| HVLT Recall      | hourly_mean_pulse_rate      | 8  | 0.59949  | 1 | 0.11623 |
| HVLT Recall      | hourly_mean_rmssd           | 7  | -0.18346 | 1 | 0.69376 |
| HVLT Recall      | hourly_median_rmssd         | 7  | 0.12823  | 5 | 0.80044 |
| HVLT Recall      | hourly_rmssd_variance       | 5  | -0.11838 | 2 | 0.83717 |
| HVLT Recognition | Semantic Fluency            |    |          | 2 | 9       |
| HVLT Recognition | MOCA                        |    |          |   |         |
| HVLT Recognition | Benton                      |    |          |   |         |
| HVLT Recognition | Letter Number Sequencing    |    |          |   |         |
| HVLT Recognition | HVLT Recall                 |    |          |   |         |
| HVLT Recognition | HVLT Recognition            |    |          |   |         |
| HVLT Recognition | HVLT Retention              | 10 | 0.68130  | 3 | 0.03006 |
| HVLT Recognition | Symbol Digit                | 10 | 0.53030  | 1 | 0.11483 |
| HVLT Recognition | STAI trait                  | 10 | -0.52761 | 1 | 0.11703 |
| HVLT Recognition | STAI state                  | 10 | -0.69389 | 4 | 0.02602 |
|                  |                             |    |          | 5 |         |

|                  |                             |    |          |         |
|------------------|-----------------------------|----|----------|---------|
| HVLT Recognition | GDS                         | 10 | 0.12298  | 0.73499 |
|                  |                             |    | 8        | 7       |
|                  |                             |    | 0.19721  | 0.58497 |
| HVLT Recognition | QUIP                        | 10 | 8        | 8       |
|                  |                             |    | 0.42420  | 0.22177 |
| HVLT Recognition | ESS                         | 10 | 8        | 5       |
|                  |                             |    | 0.00460  | 0.98992 |
| HVLT Recognition | RBDSQ                       | 10 | 7        | 2       |
|                  |                             |    | 0.03245  | 0.92907 |
| HVLT Recognition | Systolic BP Drop            | 10 | 7        | 5       |
|                  |                             |    |          | 0.62482 |
| HVLT Recognition | SCOPA autonome              | 10 | -0.17695 | 4       |
|                  |                             |    |          | 0.35666 |
| HVLT Recognition | Schwab England ADL          | 10 | -0.32682 | 9       |
|                  |                             |    | 0.69738  | 0.02497 |
| HVLT Recognition | UPDRS I                     | 10 | 6        | 3       |
|                  |                             |    | 0.36323  | 0.30221 |
| HVLT Recognition | UPDRS II                    | 10 | 8        | 7       |
|                  |                             |    | 0.06728  | 0.87421 |
| HVLT Recognition | UPDRS III OFF               | 8  | 6        | 9       |
|                  |                             |    | 0.17666  | 0.62538 |
| HVLT Recognition | UPDRS III ON                | 10 | 2        | 9       |
|                  |                             |    |          | 0.59621 |
| HVLT Recognition | UPDRS IV                    | 10 | 0.19145  | 8       |
|                  |                             |    | 0.38177  | 0.31062 |
| HVLT Recognition | LEDD                        | 9  | 8        | 9       |
|                  |                             |    |          | 0.83578 |
| HVLT Recognition | sum_walking_minutes         | 10 | -0.0755  | 4       |
|                  |                             |    |          | 0.08392 |
| HVLT Recognition | hourly_step_count_sum       | 8  | -0.6454  | 7       |
| HVLT Recognition | sleep_efficiency            | 1  |          |         |
| HVLT Recognition | num_awakenings              | 1  |          |         |
| HVLT Recognition | total_sleep_time_hour       | 1  |          |         |
| HVLT Recognition | wake_after_sleep_onset_hour | 1  |          |         |
| HVLT Recognition | total_nrem_time_hour        | 1  |          |         |
| HVLT Recognition | total_rem_time_hour         | 1  |          |         |
| HVLT Recognition | total_deep_nrem_time_hour   | 1  |          |         |
| HVLT Recognition | total_light_nrem_time_hour  | 1  |          |         |
|                  |                             |    | 0.51997  | 0.18652 |
| HVLT Recognition | hourly_mean_pulse_rate      | 8  | 5        | 7       |
| HVLT Recognition | hourly_mean_rmssd           | 7  | -0.45637 | 0.30334 |
|                  |                             |    |          | 0.31656 |
| HVLT Recognition | hourly_median_rmssd         | 7  | -0.44541 | 1       |
|                  |                             |    |          | 0.62009 |
| HVLT Recognition | hourly_rmssd_variance       | 5  | -0.30308 | 5       |
| HVLT Retention   | Semantic Fluency            |    |          |         |
| HVLT Retention   | MOCA                        |    |          |         |
| HVLT Retention   | Benton                      |    |          |         |
| HVLT Retention   | Letter Number Sequencing    |    |          |         |

|                |                             |    |          |         |
|----------------|-----------------------------|----|----------|---------|
| HVLT Retention | HVLT Recall                 |    |          |         |
| HVLT Retention | HVLT Recognition            |    |          |         |
| HVLT Retention | HVLT Retention              |    | 0.33398  | 0.34559 |
| HVLT Retention | Symbol Digit                | 10 | 2        | 7       |
|                |                             |    |          | 0.01398 |
| HVLT Retention | STAI trait                  | 10 | -0.7421  | 4       |
|                |                             |    |          | 0.00407 |
| HVLT Retention | STAI state                  | 10 | -0.81493 | 8       |
|                |                             |    | 0.05131  | 0.88805 |
| HVLT Retention | GDS                         | 10 | 1        | 2       |
|                |                             |    | 0.33348  | 0.34635 |
| HVLT Retention | QUIP                        | 10 | 7        | 7       |
|                |                             |    | 0.52024  | 0.12317 |
| HVLT Retention | ESS                         | 10 | 9        | 9       |
|                |                             |    | 0.06819  |         |
| HVLT Retention | RBDSQ                       | 10 | 3        | 0.85152 |
|                |                             |    |          | 0.37712 |
| HVLT Retention | Systolic BP Drop            | 10 | -0.31388 | 9       |
|                |                             |    | 0.15055  | 0.67803 |
| HVLT Retention | SCOPA autonome              | 10 | 1        | 4       |
|                |                             |    |          | 0.44308 |
| HVLT Retention | Schwab England ADL          | 10 | -0.27432 | 8       |
|                |                             |    | 0.74540  |         |
| HVLT Retention | UPDRS I                     | 10 | 2        | 0.01334 |
|                |                             |    | 0.30067  | 0.39857 |
| HVLT Retention | UPDRS II                    | 10 | 6        | 8       |
|                |                             |    |          | 0.63642 |
| HVLT Retention | UPDRS III OFF               | 8  | -0.19911 | 2       |
| HVLT Retention | UPDRS III ON                | 10 | -0.01578 | 0.96548 |
|                |                             |    | 0.20965  | 0.56100 |
| HVLT Retention | UPDRS IV                    | 10 | 9        | 5       |
|                |                             |    | 0.69405  | 0.03806 |
| HVLT Retention | LEDD                        | 9  | 8        | 4       |
|                |                             |    | 0.05023  | 0.89038 |
| HVLT Retention | sum_walking_minutes         | 10 | 5        | 8       |
|                |                             |    |          | 0.09037 |
| HVLT Retention | hourly_step_count_sum       | 8  | -0.63551 | 7       |
| HVLT Retention | sleep_efficiency            | 1  |          |         |
| HVLT Retention | num_awakenings              | 1  |          |         |
| HVLT Retention | total_sleep_time_hour       | 1  |          |         |
| HVLT Retention | wake_after_sleep_onset_hour | 1  |          |         |
| HVLT Retention | total_nrem_time_hour        | 1  |          |         |
| HVLT Retention | total_rem_time_hour         | 1  |          |         |
| HVLT Retention | total_deep_nrem_time_hour   | 1  |          |         |
| HVLT Retention | total_light_nrem_time_hour  | 1  |          |         |
|                |                             |    | 0.63478  |         |
| HVLT Retention | hourly_mean_pulse_rate      | 8  | 8        | 0.09086 |



|                |                          |    |          |         |         |
|----------------|--------------------------|----|----------|---------|---------|
| HVLT Retention | hourly_mean_rmssd        | 7  | -0.29234 | 4       | 0.52463 |
| HVLT Retention | hourly_median_rmssd      | 7  | -0.23667 | 8       | 0.60937 |
| HVLT Retention | hourly_rmssd_variance    | 5  | -0.04713 | 1       | 0.94001 |
| Symbol Digit   | Semantic Fluency         |    |          |         |         |
| Symbol Digit   | MOCA                     |    |          |         |         |
| Symbol Digit   | Benton                   |    |          |         |         |
| Symbol Digit   | Letter Number Sequencing |    |          |         |         |
| Symbol Digit   | HVLT Recall              |    |          |         |         |
| Symbol Digit   | HVLT Recognition         |    |          |         |         |
| Symbol Digit   | HVLT Retention           |    |          |         |         |
| Symbol Digit   | Symbol Digit             |    |          |         |         |
| Symbol Digit   | STAI trait               | 10 | -0.6013  | 6       | 0.06594 |
| Symbol Digit   | STAI state               | 10 | -0.41972 | 2       | 0.22722 |
| Symbol Digit   | GDS                      | 10 | -0.35847 | 6       | 0.30908 |
| Symbol Digit   | QUIP                     | 10 | -0.42983 | 6       | 0.21505 |
| Symbol Digit   | ESS                      | 10 | 3        | 0.50168 | 0.24138 |
| Symbol Digit   | RBDSQ                    | 10 | 9        | 0.90252 | 0.04464 |
| Symbol Digit   | Systolic BP Drop         | 10 | -0.29809 | 2       | 0.40284 |
| Symbol Digit   | SCOPA autonome           | 10 | -0.28895 | 3       | 0.41810 |
| Symbol Digit   | Schwab England ADL       | 10 | 6        | 0.71128 | 0.13438 |
| Symbol Digit   | UPDRS I                  | 10 | 4        | 0.31241 | 0.35617 |
| Symbol Digit   | UPDRS II                 | 10 | 9        | 0.98528 | 0.00672 |
| Symbol Digit   | UPDRS III OFF            | 8  | -0.32485 | 5       | 0.43239 |
| Symbol Digit   | UPDRS III ON             | 10 | -0.14478 | 4       | 0.68984 |
| Symbol Digit   | UPDRS IV                 | 10 | -0.17891 | 1       | 0.62092 |
| Symbol Digit   | LEDD                     | 9  | -0.07726 | 3       | 0.84339 |
| Symbol Digit   | sum_walking_minutes      | 10 | -0.08616 | 3       | 0.81292 |
| Symbol Digit   | hourly_step_count_sum    | 8  | 4        | 3       | 0.18793 |
| Symbol Digit   | sleep_efficiency         | 1  |          |         | 0.65583 |
| Symbol Digit   | num_awakenings           | 1  |          |         |         |

|              |                             |    |          |         |
|--------------|-----------------------------|----|----------|---------|
| Symbol Digit | total_sleep_time_hour       | 1  |          |         |
| Symbol Digit | wake_after_sleep_onset_hour | 1  |          |         |
| Symbol Digit | total_nrem_time_hour        | 1  |          |         |
| Symbol Digit | total_rem_time_hour         | 1  |          |         |
| Symbol Digit | total_deep_nrem_time_hour   | 1  |          |         |
| Symbol Digit | total_light_nrem_time_hour  | 1  |          | 0.59280 |
| Symbol Digit | hourly_mean_pulse_rate      | 8  | -0.22461 | 9       |
| Symbol Digit | hourly_mean_rmssd           | 7  | -0.40528 | 9       |
| Symbol Digit | hourly_median_rmssd         | 7  | -0.41816 | 9       |
| Symbol Digit | hourly_rmssd_variance       | 5  | 0.4825   | 9       |
| STAI trait   | Semantic Fluency            |    |          |         |
| STAI trait   | MOCA                        |    |          |         |
| STAI trait   | Benton                      |    |          |         |
| STAI trait   | Letter Number Sequencing    |    |          |         |
| STAI trait   | HVLT Recall                 |    |          |         |
| STAI trait   | HVLT Recognition            |    |          |         |
| STAI trait   | HVLT Retention              |    |          |         |
| STAI trait   | Symbol Digit                |    |          |         |
| STAI trait   | STAI trait                  |    | 0.56492  | 0.07016 |
| STAI trait   | STAI state                  | 11 | 3        | 9       |
| STAI trait   | GDS                         | 11 | 0.37118  | 0.26105 |
| STAI trait   | QUIP                        | 11 | 8        | 4       |
| STAI trait   | ESS                         | 11 | 0.21753  |         |
| STAI trait   | RBDSQ                       | 11 | 4        | 0.52052 |
| STAI trait   | Systolic BP Drop            | 11 | -0.14389 | 0.67297 |
| STAI trait   | SCOPA autonome              | 11 | -0.16971 | 1       |
| STAI trait   | Schwab England ADL          | 11 | -0.16971 | 0.61786 |
| STAI trait   | UPDRS I                     | 11 | -0.16971 | 3       |
| STAI trait   | UPDRS II                    | 11 | -0.16971 | 0.21035 |
| STAI trait   | UPDRS III OFF               | 9  | 0.41006  | 9       |
| STAI trait   | UPDRS III ON                | 10 | 0.04276  | 0.90064 |
| STAI trait   | UPDRS IV                    | 10 | 0.04276  | 0.90064 |
| STAI trait   |                             | 9  | 7        | 1       |
| STAI trait   |                             | 11 | -0.04037 | 0.90618 |
| STAI trait   |                             | 11 | -0.31278 | 2       |
| STAI trait   |                             | 11 | -0.25874 | 0.34901 |
| STAI trait   |                             | 11 | 0.20313  | 0.44234 |
| STAI trait   |                             | 9  | 8        | 8       |
| STAI trait   |                             | 10 | -0.01455 | 0.60013 |
| STAI trait   |                             | 10 | -0.12595 | 0.96817 |
| STAI trait   |                             | 10 | -0.12595 | 4       |
| STAI trait   |                             | 10 | -0.12595 | 0.72881 |
| STAI trait   |                             | 10 | -0.12595 | 2       |

|            |                            |    |          |         |
|------------|----------------------------|----|----------|---------|
|            |                            |    |          | 0.38231 |
| STAI trait | LEDD                       | 10 | -0.31066 | 1       |
|            |                            |    |          | 0.78118 |
| STAI trait | sum_walking_minutes        | 11 | -0.09498 | 7       |
|            |                            |    | 0.08519  | 0.82748 |
| STAI trait | hourly_step_count_sum      | 9  | 6        | 7       |
| STAI trait | sleep_efficiency           | 2  | -1       | 1       |
| STAI trait | num_awakenings             | 2  | 1        | 1       |
| STAI trait | total_sleep_time_hour      | 2  | -1       | 1       |
|            | wake_after_sleep_onset_hou |    |          |         |
| STAI trait | r                          | 2  | 1        | 1       |
| STAI trait | total_nrem_time_hour       | 2  | -1       | 1       |
| STAI trait | total_rem_time_hour        | 2  | -1       | 1       |
| STAI trait | total_deep_nrem_time_hour  | 2  | -1       | 1       |
| STAI trait | total_light_nrem_time_hour | 2  | -1       | 1       |
|            |                            |    |          | 0.30819 |
| STAI trait | hourly_mean_pulse_rate     | 9  | -0.38355 | 6       |
|            |                            |    | 0.34507  | 0.40250 |
| STAI trait | hourly_mean_rmssd          | 8  | 8        | 9       |
|            |                            |    | 0.29519  | 0.47782 |
| STAI trait | hourly_median_rmssd        | 8  | 1        | 9       |
|            |                            |    |          | 0.36487 |
| STAI trait | hourly_rmssd_variance      | 6  | -0.45477 | 4       |
| STAI state | Semantic Fluency           |    |          |         |
| STAI state | MOCA                       |    |          |         |
| STAI state | Benton                     |    |          |         |
| STAI state | Letter Number Sequencing   |    |          |         |
| STAI state | HVLT Recall                |    |          |         |
| STAI state | HVLT Recognition           |    |          |         |
| STAI state | HVLT Retention             |    |          |         |
| STAI state | Symbol Digit               |    |          |         |
| STAI state | STAI trait                 |    |          |         |
| STAI state | STAI state                 |    |          |         |
|            |                            |    |          | 0.84920 |
| STAI state | GDS                        | 11 | -0.06509 | 8       |
|            |                            |    | 0.00618  | 0.98559 |
| STAI state | QUIP                       | 11 | 9        | 2       |
|            |                            |    | 0.18295  | 0.59025 |
| STAI state | ESS                        | 11 | 8        | 9       |
|            |                            |    | 0.16648  | 0.62467 |
| STAI state | RBDSQ                      | 11 | 2        | 1       |
|            |                            |    | 0.30479  | 0.36209 |
| STAI state | Systolic BP Drop           | 11 | 9        | 6       |
|            |                            |    |          | 0.35954 |
| STAI state | SCOPA autonome             | 11 | -0.30634 | 6       |
|            |                            |    | 0.51097  | 0.10820 |
| STAI state | Schwab England ADL         | 11 | 6        | 9       |
|            |                            |    |          | 0.00552 |
| STAI state | UPDRS I                    | 11 | -0.77046 | 2       |

|            |                             |    |          |         |
|------------|-----------------------------|----|----------|---------|
| STAI state | UPDRS II                    | 11 | -0.30872 | 0.35563 |
|            |                             |    | 0.18707  | 0.62982 |
| STAI state | UPDRS III OFF               | 9  | 9        | 8       |
|            |                             |    | 0.27927  | 0.43454 |
| STAI state | UPDRS III ON                | 10 | 5        | 5       |
|            |                             |    |          | 0.25872 |
| STAI state | UPDRS IV                    | 10 | -0.3949  | 9       |
|            |                             |    |          | 0.09614 |
| STAI state | LEDD                        | 10 | -0.5546  | 8       |
|            |                             |    |          | 0.76512 |
| STAI state | sum_walking_minutes         | 11 | -0.10212 | 4       |
|            |                             |    | 0.66907  | 0.04874 |
| STAI state | hourly_step_count_sum       | 9  | 6        | 6       |
| STAI state | sleep_efficiency            | 2  | -1       | 1       |
| STAI state | num_awakenings              | 2  | 1        | 1       |
| STAI state | total_sleep_time_hour       | 2  | -1       | 1       |
|            | wake_after_sleep_onset_hour |    |          |         |
| STAI state | r                           | 2  | 1        | 1       |
| STAI state | total_nrem_time_hour        | 2  | -1       | 1       |
| STAI state | total_rem_time_hour         | 2  | -1       | 1       |
| STAI state | total_deep_nrem_time_hour   | 2  | -1       | 1       |
| STAI state | total_light_nrem_time_hour  | 2  | -1       | 1       |
|            |                             |    |          | 0.37535 |
| STAI state | hourly_mean_pulse_rate      | 9  | -0.33688 | 5       |
|            |                             |    | 0.50102  | 0.20595 |
| STAI state | hourly_mean_rmssd           | 8  | 3        | 4       |
|            |                             |    | 0.47554  | 0.23366 |
| STAI state | hourly_median_rmssd         | 8  | 4        | 1       |
|            |                             |    | 0.04313  | 0.93534 |
| STAI state | hourly_rmssd_variance       | 6  | 2        | 2       |
| GDS        | Semantic Fluency            |    |          |         |
| GDS        | MOCA                        |    |          |         |
| GDS        | Benton                      |    |          |         |
| GDS        | Letter Number Sequencing    |    |          |         |
| GDS        | HVLT Recall                 |    |          |         |
| GDS        | HVLT Recognition            |    |          |         |
| GDS        | HVLT Retention              |    |          |         |
| GDS        | Symbol Digit                |    |          |         |
| GDS        | STAI trait                  |    |          |         |
| GDS        | STAI state                  |    |          |         |
| GDS        | GDS                         |    |          |         |
|            |                             |    |          | 0.05246 |
| GDS        | QUIP                        | 11 | 0.59703  | 8       |
|            |                             |    | 0.39417  | 0.23031 |
| GDS        | ESS                         | 11 | 1        | 2       |
|            |                             |    | 0.27021  | 0.42161 |
| GDS        | RBDSQ                       | 11 | 4        | 7       |
|            |                             |    | 0.59222  | 0.05489 |
| GDS        | Systolic BP Drop            | 11 | 1        | 9       |

|      |                             |    |          |         |
|------|-----------------------------|----|----------|---------|
|      |                             |    | 0.31429  | 0.34655 |
| GDS  | SCOPA autonome              | 11 | 8        | 1       |
|      |                             |    |          | 0.18606 |
| GDS  | Schwab England ADL          | 11 | -0.43067 | 6       |
|      |                             |    | 0.41070  | 0.20956 |
| GDS  | UPDRS I                     | 11 | 7        | 8       |
|      |                             |    | 0.68583  | 0.01981 |
| GDS  | UPDRS II                    | 11 | 6        | 3       |
|      |                             |    |          | 0.62818 |
| GDS  | UPDRS III OFF               | 9  | -0.18796 | 3       |
|      |                             |    |          | 0.54903 |
| GDS  | UPDRS III ON                | 10 | -0.21595 | 3       |
|      |                             |    | 0.27160  | 0.44779 |
| GDS  | UPDRS IV                    | 10 | 1        | 5       |
|      |                             |    | 0.03922  | 0.91433 |
| GDS  | LEDD                        | 10 | 2        | 3       |
|      |                             |    |          | 0.03575 |
| GDS  | sum_walking_minutes         | 11 | -0.63514 | 3       |
|      |                             |    |          | 0.09653 |
| GDS  | hourly_step_count_sum       | 9  | -0.58704 | 8       |
| GDS  | sleep_efficiency            | 2  | -1       | 1       |
| GDS  | num_awakenings              | 2  | 1        | 1       |
| GDS  | total_sleep_time_hour       | 2  | -1       | 1       |
|      | wake_after_sleep_onset_hour |    |          |         |
| GDS  | r                           | 2  | 1        | 1       |
| GDS  | total_nrem_time_hour        | 2  | -1       | 1       |
| GDS  | total_rem_time_hour         | 2  | -1       | 1       |
| GDS  | total_deep_nrem_time_hour   | 2  | -1       | 1       |
| GDS  | total_light_nrem_time_hour  | 2  | -1       | 1       |
|      |                             |    | 0.08756  | 0.82275 |
| GDS  | hourly_mean_pulse_rate      | 9  | 1        | 7       |
|      |                             |    | 0.20320  | 0.62934 |
| GDS  | hourly_mean_rmssd           | 8  | 7        | 5       |
|      |                             |    |          | 0.57869 |
| GDS  | hourly_median_rmssd         | 8  | 0.23299  | 6       |
|      |                             |    |          | 0.25085 |
| GDS  | hourly_rmssd_variance       | 6  | -0.55704 | 8       |
| QUIP | Semantic Fluency            |    |          |         |
| QUIP | MOCA                        |    |          |         |
| QUIP | Benton                      |    |          |         |
| QUIP | Letter Number Sequencing    |    |          |         |
| QUIP | HVLT Recall                 |    |          |         |
| QUIP | HVLT Recognition            |    |          |         |
| QUIP | HVLT Retention              |    |          |         |
| QUIP | Symbol Digit                |    |          |         |
| QUIP | STAI trait                  |    |          |         |
| QUIP | STAI state                  |    |          |         |
| QUIP | GDS                         |    |          |         |
| QUIP | QUIP                        |    |          |         |

|      |                             |    |          |         |
|------|-----------------------------|----|----------|---------|
|      |                             |    | 0.34488  | 0.29894 |
| QUIP | ESS                         | 11 | 1        | 6       |
| QUIP | RBDSQ                       | 11 | 0.15008  | 0.65961 |
|      |                             |    | 0.12624  | 0.71146 |
| QUIP | Systolic BP Drop            | 11 | 8        | 9       |
|      |                             |    | 0.00954  | 0.97778 |
| QUIP | SCOPA autonome              | 11 | 1        | 8       |
| QUIP | Schwab England ADL          | 11 | -0.36635 | 0.26781 |
|      |                             |    | 0.38552  | 0.24161 |
| QUIP | UPDRS I                     | 11 | 5        | 6       |
|      |                             |    | 0.21891  | 0.51780 |
| QUIP | UPDRS II                    | 11 | 7        | 6       |
|      |                             |    |          | 0.63327 |
| QUIP | UPDRS III OFF               | 9  | -0.18523 | 5       |
|      |                             |    |          | 0.37797 |
| QUIP | UPDRS III ON                | 10 | 0.31335  | 8       |
|      |                             |    | 0.04987  | 0.89117 |
| QUIP | UPDRS IV                    | 10 | 1        | 8       |
|      |                             |    | 0.15561  | 0.66772 |
| QUIP | LEDD                        | 10 | 1        | 4       |
|      |                             |    |          | 0.62083 |
| QUIP | sum_walking_minutes         | 11 | -0.1683  | 4       |
|      |                             |    |          | 0.20822 |
| QUIP | hourly_step_count_sum       | 9  | -0.4641  | 9       |
| QUIP | sleep_efficiency            | 2  | -1       | 1       |
| QUIP | num_awakenings              | 2  | 1        | 1       |
| QUIP | total_sleep_time_hour       | 2  | -1       | 1       |
|      | wake_after_sleep_onset_hour |    |          |         |
| QUIP | r                           | 2  | 1        | 1       |
| QUIP | total_nrem_time_hour        | 2  | -1       | 1       |
| QUIP | total_rem_time_hour         | 2  | -1       | 1       |
| QUIP | total_deep_nrem_time_hour   | 2  | -1       | 1       |
| QUIP | total_light_nrem_time_hour  | 2  | -1       | 1       |
|      |                             |    | 0.30398  | 0.42645 |
| QUIP | hourly_mean_pulse_rate      | 9  | 5        | 4       |
|      |                             |    | 0.67686  | 0.06522 |
| QUIP | hourly_mean_rmssd           | 8  | 9        | 8       |
|      |                             |    | 0.69414  | 0.05612 |
| QUIP | hourly_median_rmssd         | 8  | 1        | 7       |
|      |                             |    |          | 0.09009 |
| QUIP | hourly_rmssd_variance       | 6  | -0.74373 | 7       |
| ESS  | Semantic Fluency            |    |          |         |
| ESS  | MOCA                        |    |          |         |
| ESS  | Benton                      |    |          |         |
| ESS  | Letter Number Sequencing    |    |          |         |
| ESS  | HVLT Recall                 |    |          |         |
| ESS  | HVLT Recognition            |    |          |         |
| ESS  | HVLT Retention              |    |          |         |
| ESS  | Symbol Digit                |    |          |         |

|       |                             |    |          |         |
|-------|-----------------------------|----|----------|---------|
| ESS   | STAI trait                  |    |          |         |
| ESS   | STAI state                  |    |          |         |
| ESS   | GDS                         |    |          |         |
| ESS   | QUIP                        |    |          |         |
| ESS   | ESS                         |    | 0.46761  | 0.14696 |
| ESS   | RBDSQ                       | 11 | 2        | 7       |
| ESS   | Systolic BP Drop            | 11 | 0.20875  | 0.5379  |
|       |                             |    |          | 0.72932 |
| ESS   | SCOPA autonome              | 11 | -0.11816 | 9       |
|       |                             |    | 0.37237  | 0.25941 |
| ESS   | Schwab England ADL          | 11 | 5        | 3       |
|       |                             |    | 0.07274  | 0.83168 |
| ESS   | UPDRS I                     | 11 | 3        | 2       |
|       |                             |    | 0.42161  | 0.19651 |
| ESS   | UPDRS II                    | 11 | 6        | 5       |
|       |                             |    |          | 0.32133 |
| ESS   | UPDRS III OFF               | 9  | -0.37405 | 5       |
| ESS   | UPDRS III ON                | 10 | -0.2644  | 0.46039 |
|       |                             |    |          | 0.59999 |
| ESS   | UPDRS IV                    | 10 | 0.18952  | 7       |
| ESS   | LEDD                        | 10 | -0.02691 | 0.94118 |
|       |                             |    |          | 0.00873 |
| ESS   | sum_walking_minutes         | 11 | -0.7434  | 8       |
|       |                             |    |          | 0.93215 |
| ESS   | hourly_step_count_sum       | 9  | -0.03334 | 1       |
| ESS   | sleep_efficiency            | 2  | -1       | 1       |
| ESS   | num_awakenings              | 2  | 1        | 1       |
| ESS   | total_sleep_time_hour       | 2  | -1       | 1       |
|       | wake_after_sleep_onset_hour |    |          |         |
| ESS   | r                           | 2  | 1        | 1       |
| ESS   | total_nrem_time_hour        | 2  | -1       | 1       |
| ESS   | total_rem_time_hour         | 2  | -1       | 1       |
| ESS   | total_deep_nrem_time_hour   | 2  | -1       | 1       |
| ESS   | total_light_nrem_time_hour  | 2  | -1       | 1       |
|       |                             |    | 0.20378  |         |
| ESS   | hourly_mean_pulse_rate      | 9  | 6        | 0.59895 |
|       |                             |    |          | 0.73807 |
| ESS   | hourly_mean_rmssd           | 8  | -0.14157 | 9       |
|       |                             |    |          | 0.79972 |
| ESS   | hourly_median_rmssd         | 8  | -0.10764 | 3       |
|       |                             |    |          | 0.21877 |
| ESS   | hourly_rmssd_variance       | 6  | -0.58889 | 5       |
| RBDSQ | Semantic Fluency            |    |          |         |
| RBDSQ | MOCA                        |    |          |         |
| RBDSQ | Benton                      |    |          |         |
| RBDSQ | Letter Number Sequencing    |    |          |         |
| RBDSQ | HVLT Recall                 |    |          |         |
| RBDSQ | HVLT Recognition            |    |          |         |

|                  |                            |    |          |         |
|------------------|----------------------------|----|----------|---------|
| RBDSQ            | HVLT Retention             |    |          |         |
| RBDSQ            | Symbol Digit               |    |          |         |
| RBDSQ            | STAI trait                 |    |          |         |
| RBDSQ            | STAI state                 |    |          |         |
| RBDSQ            | GDS                        |    |          |         |
| RBDSQ            | QUIP                       |    |          |         |
| RBDSQ            | ESS                        |    |          |         |
| RBDSQ            | RBDSQ                      |    |          |         |
|                  |                            |    | 0.39540  | 0.22872 |
| RBDSQ            | Systolic BP Drop           | 11 | 5        | 4       |
|                  |                            |    | 0.27020  | 0.42163 |
| RBDSQ            | SCOPA autonome             | 11 | 2        | 8       |
|                  |                            |    | 0.05952  | 0.86199 |
| RBDSQ            | Schwab England ADL         | 11 | 1        | 5       |
|                  |                            |    |          | 0.77801 |
| RBDSQ            | UPDRS I                    | 11 | -0.09638 | 6       |
|                  |                            |    | 0.34269  | 0.30221 |
| RBDSQ            | UPDRS II                   | 11 | 7        | 9       |
|                  |                            |    |          | 0.59565 |
| RBDSQ            | UPDRS III OFF              | 9  | -0.20558 | 8       |
|                  |                            |    |          | 0.26463 |
| RBDSQ            | UPDRS III ON               | 10 | -0.39044 | 9       |
|                  |                            |    | 0.34942  | 0.32231 |
| RBDSQ            | UPDRS IV                   | 10 | 7        | 9       |
|                  |                            |    |          | 0.56232 |
| RBDSQ            | LEDD                       | 10 | 0.20897  | 3       |
|                  |                            |    |          | 0.11569 |
| RBDSQ            | sum_walking_minutes        | 11 | -0.5019  | 5       |
|                  |                            |    |          | 0.81847 |
| RBDSQ            | hourly_step_count_sum      | 9  | -0.08971 | 3       |
| RBDSQ            | sleep_efficiency           | 2  | -1       | 1       |
| RBDSQ            | num_awakenings             | 2  | 1        | 1       |
| RBDSQ            | total_sleep_time_hour      | 2  | -1       | 1       |
|                  | wake_after_sleep_onset_hou |    |          |         |
| RBDSQ            | r                          | 2  | 1        | 1       |
| RBDSQ            | total_nrem_time_hour       | 2  | -1       | 1       |
| RBDSQ            | total_rem_time_hour        | 2  | -1       | 1       |
| RBDSQ            | total_deep_nrem_time_hour  | 2  | -1       | 1       |
| RBDSQ            | total_light_nrem_time_hour | 2  | -1       | 1       |
|                  |                            |    |          | 0.75090 |
| RBDSQ            | hourly_mean_pulse_rate     | 9  | -0.12385 | 7       |
|                  |                            |    |          | 0.94421 |
| RBDSQ            | hourly_mean_rmssd          | 8  | -0.02977 | 9       |
|                  |                            |    | 0.03100  | 0.94190 |
| RBDSQ            | hourly_median_rmssd        | 8  | 6        | 1       |
|                  |                            |    |          | 0.71528 |
| RBDSQ            | hourly_rmssd_variance      | 6  | -0.19218 | 2       |
| Systolic BP Drop | Semantic Fluency           |    |          |         |
| Systolic BP Drop | MOCA                       |    |          |         |



|                  |                             |    |          |         |
|------------------|-----------------------------|----|----------|---------|
| Systolic BP Drop | Benton                      |    |          |         |
| Systolic BP Drop | Letter Number Sequencing    |    |          |         |
| Systolic BP Drop | HVLT Recall                 |    |          |         |
| Systolic BP Drop | HVLT Recognition            |    |          |         |
| Systolic BP Drop | HVLT Retention              |    |          |         |
| Systolic BP Drop | Symbol Digit                |    |          |         |
| Systolic BP Drop | STAI trait                  |    |          |         |
| Systolic BP Drop | STAI state                  |    |          |         |
| Systolic BP Drop | GDS                         |    |          |         |
| Systolic BP Drop | QUIP                        |    |          |         |
| Systolic BP Drop | ESS                         |    |          |         |
| Systolic BP Drop | RBDSQ                       |    |          |         |
| Systolic BP Drop | Systolic BP Drop            |    | 0.16771  | 0.62206 |
| Systolic BP Drop | SCOPA autonome              | 11 | 8        | 4       |
|                  |                             |    | 0.04682  | 0.78939 |
| Systolic BP Drop | Schwab England ADL          | 35 | 3        | 8       |
|                  |                             |    |          | 0.67060 |
| Systolic BP Drop | UPDRS I                     | 35 | -0.0745  | 3       |
|                  |                             |    | 0.24628  | 0.15381 |
| Systolic BP Drop | UPDRS II                    | 35 | 4        | 2       |
|                  |                             |    |          | 0.31080 |
| Systolic BP Drop | UPDRS III OFF               | 10 | 0.35728  | 6       |
|                  |                             |    |          | 0.47838 |
| Systolic BP Drop | UPDRS III ON                | 33 | -0.12783 | 3       |
|                  |                             |    |          | 0.02767 |
| Systolic BP Drop | UPDRS IV                    | 34 | -0.37764 | 1       |
|                  |                             |    | 0.00553  | 0.97522 |
| Systolic BP Drop | LEDD                        | 34 | 4        | 2       |
|                  |                             |    |          | 0.63575 |
| Systolic BP Drop | sum_walking_minutes         | 35 | -0.08293 | 3       |
|                  |                             |    |          | 0.88885 |
| Systolic BP Drop | hourly_step_count_sum       | 33 | -0.0253  | 2       |
|                  |                             |    |          | 0.19007 |
| Systolic BP Drop | sleep_efficiency            | 11 | -0.42716 | 3       |
|                  |                             |    |          | 0.05655 |
| Systolic BP Drop | num_awakenings              | 11 | -0.58903 | 4       |
|                  |                             |    |          | 0.33576 |
| Systolic BP Drop | total_sleep_time_hour       | 11 | -0.32102 | 7       |
| Systolic BP Drop | wake_after_sleep_onset_hour | 11 | -0.38561 | 0.24151 |
|                  |                             |    |          | 0.39693 |
| Systolic BP Drop | total_nrem_time_hour        | 11 | -0.28424 | 9       |
|                  |                             |    |          | 0.28885 |
| Systolic BP Drop | total_rem_time_hour         | 11 | -0.3517  | 1       |
|                  |                             |    |          | 0.26550 |
| Systolic BP Drop | total_deep_nrem_time_hour   | 11 | -0.36799 | 3       |
|                  |                             |    |          | 0.64687 |
| Systolic BP Drop | total_light_nrem_time_hour  | 11 | -0.15602 | 6       |

|                  |                             |    |          |         |
|------------------|-----------------------------|----|----------|---------|
|                  |                             |    |          | 0.39785 |
| Systolic BP Drop | hourly_mean_pulse_rate      | 33 | -0.15218 | 2       |
|                  |                             |    | 0.09459  | 0.60658 |
| Systolic BP Drop | hourly_mean_rmssd           | 32 | 1        | 4       |
|                  |                             |    |          | 0.64714 |
| Systolic BP Drop | hourly_median_rmssd         | 32 | 0.08412  | 3       |
|                  |                             |    | 0.19852  | 0.30189 |
| Systolic BP Drop | hourly_rmssd_variance       | 29 | 4        | 4       |
| SCOPA autonome   | Semantic Fluency            |    |          |         |
| SCOPA autonome   | MOCA                        |    |          |         |
| SCOPA autonome   | Benton                      |    |          |         |
| SCOPA autonome   | Letter Number Sequencing    |    |          |         |
| SCOPA autonome   | HVLT Recall                 |    |          |         |
| SCOPA autonome   | HVLT Recognition            |    |          |         |
| SCOPA autonome   | HVLT Retention              |    |          |         |
| SCOPA autonome   | Symbol Digit                |    |          |         |
| SCOPA autonome   | STAI trait                  |    |          |         |
| SCOPA autonome   | STAI state                  |    |          |         |
| SCOPA autonome   | GDS                         |    |          |         |
| SCOPA autonome   | QUIP                        |    |          |         |
| SCOPA autonome   | ESS                         |    |          |         |
| SCOPA autonome   | RBDSQ                       |    |          |         |
| SCOPA autonome   | Systolic BP Drop            |    |          |         |
| SCOPA autonome   | SCOPA autonome              |    |          |         |
| SCOPA autonome   | Schwab England ADL          | 11 | -0.4893  | 0.12664 |
|                  |                             |    | 0.06969  | 0.83864 |
| SCOPA autonome   | UPDRS I                     | 11 | 8        | 4       |
|                  |                             |    | 0.14588  | 0.66864 |
| SCOPA autonome   | UPDRS II                    | 11 | 5        | 8       |
|                  |                             |    |          | 0.57988 |
| SCOPA autonome   | UPDRS III OFF               | 9  | 0.21425  | 7       |
| SCOPA autonome   | UPDRS III ON                | 10 | -0.76543 | 0.00987 |
|                  |                             |    | 0.72064  |         |
| SCOPA autonome   | UPDRS IV                    | 10 | 8        | 0.01871 |
|                  |                             |    | 0.65134  | 0.04133 |
| SCOPA autonome   | LEDD                        | 10 | 9        | 3       |
|                  |                             |    |          | 0.60779 |
| SCOPA autonome   | sum_walking_minutes         | 11 | -0.17452 | 4       |
|                  |                             |    |          | 0.06049 |
| SCOPA autonome   | hourly_step_count_sum       | 9  | -0.64537 | 4       |
| SCOPA autonome   | sleep_efficiency            | 2  | 1        | 1       |
| SCOPA autonome   | num_awakenings              | 2  | -1       | 1       |
| SCOPA autonome   | total_sleep_time_hour       | 2  | 1        | 1       |
|                  | wake_after_sleep_onset_hour |    |          |         |
| SCOPA autonome   | r                           | 2  | -1       | 1       |
| SCOPA autonome   | total_nrem_time_hour        | 2  | 1        | 1       |
| SCOPA autonome   | total_rem_time_hour         | 2  | 1        | 1       |
| SCOPA autonome   | total_deep_nrem_time_hour   | 2  | 1        | 1       |
| SCOPA autonome   | total_light_nrem_time_hour  | 2  | 1        | 1       |

|                    |                            |    |          |         |
|--------------------|----------------------------|----|----------|---------|
| SCOPA autonome     | hourly_mean_pulse_rate     | 9  | 0.31767  | 0.40481 |
|                    |                            | 9  |          | 5       |
| SCOPA autonome     | hourly_mean_rmssd          | 8  | -0.26399 | 0.52752 |
|                    |                            |    |          | 7       |
| SCOPA autonome     | hourly_median_rmssd        | 8  | -0.18314 | 0.66421 |
|                    |                            |    |          | 2       |
| SCOPA autonome     | hourly_rmssd_variance      | 6  | -0.22403 | 0.66957 |
|                    |                            |    |          | 4       |
| Schwab England ADL | Semantic Fluency           |    |          |         |
| Schwab England ADL | MOCA                       |    |          |         |
| Schwab England ADL | Benton                     |    |          |         |
| Schwab England ADL | Letter Number Sequencing   |    |          |         |
| Schwab England ADL | HVLT Recall                |    |          |         |
| Schwab England ADL | HVLT Recognition           |    |          |         |
| Schwab England ADL | HVLT Retention             |    |          |         |
| Schwab England ADL | Symbol Digit               |    |          |         |
| Schwab England ADL | STAI trait                 |    |          |         |
| Schwab England ADL | STAI state                 |    |          |         |
| Schwab England ADL | GDS                        |    |          |         |
| Schwab England ADL | QUIP                       |    |          |         |
| Schwab England ADL | ESS                        |    |          |         |
| Schwab England ADL | RBDSQ                      |    |          |         |
| Schwab England ADL | Systolic BP Drop           |    |          |         |
| Schwab England ADL | SCOPA autonome             |    |          |         |
| Schwab England ADL | Schwab England ADL         |    |          |         |
|                    |                            |    |          | 0.29941 |
| Schwab England ADL | UPDRS I                    | 35 | -0.18051 | 4       |
|                    |                            |    |          | 0.22955 |
| Schwab England ADL | UPDRS II                   | 35 | -0.20842 | 8       |
|                    |                            |    |          | 0.96817 |
| Schwab England ADL | UPDRS III OFF              | 10 | -0.01455 | 8       |
|                    |                            |    |          | 0.07661 |
| Schwab England ADL | UPDRS III ON               | 33 | -0.31251 | 4       |
|                    |                            |    |          | 0.16370 |
| Schwab England ADL | UPDRS IV                   | 34 | -0.24435 | 9       |
|                    |                            |    |          | 0.00713 |
| Schwab England ADL | LEDD                       | 34 | -0.453   | 8       |
|                    |                            |    | 0.08826  | 0.61413 |
| Schwab England ADL | sum_walking_minutes        | 35 | 1        | 2       |
|                    |                            |    | 0.19838  |         |
| Schwab England ADL | hourly_step_count_sum      | 33 | 4        | 0.26841 |
|                    |                            |    |          | 0.80558 |
| Schwab England ADL | sleep_efficiency           | 11 | -0.0842  | 7       |
|                    |                            |    | 0.28798  | 0.39047 |
| Schwab England ADL | num_awakenings             | 11 | 1        | 6       |
|                    |                            |    | 0.26067  | 0.43881 |
| Schwab England ADL | total_sleep_time_hour      | 11 | 3        | 8       |
|                    | wake_after_sleep_onset_hou |    | 0.21465  | 0.52619 |
| Schwab England ADL | r                          | 11 | 3        | 5       |

|                    |                            |    |          |   |         |
|--------------------|----------------------------|----|----------|---|---------|
| Schwab England ADL | total_nrem_time_hour       | 11 | 0.22933  | 3 | 0.49756 |
|                    |                            |    | 0.28866  | 3 | 0.38929 |
| Schwab England ADL | total_rem_time_hour        | 11 | 6        | 9 | 0.40244 |
| Schwab England ADL | total_deep_nrem_time_hour  | 11 | -0.28107 | 4 | 0.27560 |
| Schwab England ADL | total_light_nrem_time_hour | 11 | 0.36085  | 2 | 0.11037 |
| Schwab England ADL | hourly_mean_pulse_rate     | 33 | -0.28311 | 4 | 0.07142 |
| Schwab England ADL | hourly_mean_rmssd          | 32 | -0.32294 | 2 | 0.06629 |
| Schwab England ADL | hourly_median_rmssd        | 32 | -0.32863 | 1 | 0.39388 |
| Schwab England ADL | hourly_rmssd_variance      | 29 | -0.16448 | 3 |         |
| UPDRS I            | Semantic Fluency           |    |          |   |         |
| UPDRS I            | MOCA                       |    |          |   |         |
| UPDRS I            | Benton                     |    |          |   |         |
| UPDRS I            | Letter Number Sequencing   |    |          |   |         |
| UPDRS I            | HVLT Recall                |    |          |   |         |
| UPDRS I            | HVLT Recognition           |    |          |   |         |
| UPDRS I            | HVLT Retention             |    |          |   |         |
| UPDRS I            | Symbol Digit               |    |          |   |         |
| UPDRS I            | STAI trait                 |    |          |   |         |
| UPDRS I            | STAI state                 |    |          |   |         |
| UPDRS I            | GDS                        |    |          |   |         |
| UPDRS I            | QUIP                       |    |          |   |         |
| UPDRS I            | ESS                        |    |          |   |         |
| UPDRS I            | RBDSQ                      |    |          |   |         |
| UPDRS I            | Systolic BP Drop           |    |          |   |         |
| UPDRS I            | SCOPA autonome             |    |          |   |         |
| UPDRS I            | Schwab England ADL         |    |          |   |         |
| UPDRS I            | UPDRS I                    |    |          |   |         |
|                    |                            |    | 0.46210  | 3 | 0.00519 |
| UPDRS I            | UPDRS II                   | 35 | 3        | 5 |         |
| UPDRS I            | UPDRS III OFF              | 10 | -0.29464 |   | 0.40857 |
| UPDRS I            | UPDRS III ON               | 33 | -0.2095  |   | 0.24195 |
|                    |                            |    | 0.32632  |   | 0.05962 |
| UPDRS I            | UPDRS IV                   | 34 | 4        | 8 |         |
|                    |                            |    |          |   | 0.99130 |
| UPDRS I            | LEDD                       | 34 | -0.00194 | 7 |         |
|                    |                            |    |          |   | 0.57947 |
| UPDRS I            | sum_walking_minutes        | 35 | -0.09697 | 4 |         |
| UPDRS I            | hourly_step_count_sum      | 33 | -0.28214 |   | 0.11166 |
|                    |                            |    | 0.56673  |   | 0.06907 |
| UPDRS I            | sleep_efficiency           | 11 | 1        | 8 |         |
|                    |                            |    |          |   | 0.91749 |
| UPDRS I            | num_awakenings             | 11 | -0.03549 | 9 |         |

|          |                             |    |          |         |
|----------|-----------------------------|----|----------|---------|
|          |                             |    | 0.43361  | 0.18273 |
| UPDRS I  | total_sleep_time_hour       | 11 | 3        | 8       |
| UPDRS I  | wake_after_sleep_onset_hour | 11 | -0.1159  | 6       |
|          |                             |    | 0.37664  | 0.25355 |
| UPDRS I  | total_nrem_time_hour        | 11 | 3        | 7       |
|          |                             |    | 0.49026  | 0.12577 |
| UPDRS I  | total_rem_time_hour         | 11 | 9        | 3       |
|          |                             |    | 0.83271  | 0.00146 |
| UPDRS I  | total_deep_nrem_time_hour   | 11 | 8        | 4       |
|          |                             |    | 0.06645  | 0.84607 |
| UPDRS I  | total_light_nrem_time_hour  | 11 | 5        | 3       |
|          |                             |    |          | 0.24624 |
| UPDRS I  | hourly_mean_pulse_rate      | 33 | -0.20764 | 7       |
|          |                             |    |          | 0.67192 |
| UPDRS I  | hourly_mean_rmssd           | 32 | 0.07785  | 6       |
|          |                             |    | 0.12340  | 0.50101 |
| UPDRS I  | hourly_median_rmssd         | 32 | 7        | 2       |
|          |                             |    | 0.08632  | 0.65612 |
| UPDRS I  | hourly_rmssd_variance       | 29 | 7        | 4       |
| UPDRS II | Semantic Fluency            |    |          |         |
| UPDRS II | MOCA                        |    |          |         |
| UPDRS II | Benton                      |    |          |         |
| UPDRS II | Letter Number Sequencing    |    |          |         |
| UPDRS II | HVLT Recall                 |    |          |         |
| UPDRS II | HVLT Recognition            |    |          |         |
| UPDRS II | HVLT Retention              |    |          |         |
| UPDRS II | Symbol Digit                |    |          |         |
| UPDRS II | STAI trait                  |    |          |         |
| UPDRS II | STAI state                  |    |          |         |
| UPDRS II | GDS                         |    |          |         |
| UPDRS II | QUIP                        |    |          |         |
| UPDRS II | ESS                         |    |          |         |
| UPDRS II | RBDSQ                       |    |          |         |
| UPDRS II | Systolic BP Drop            |    |          |         |
| UPDRS II | SCOPA autonome              |    |          |         |
| UPDRS II | Schwab England ADL          |    |          |         |
| UPDRS II | UPDRS I                     |    |          |         |
| UPDRS II | UPDRS II                    |    |          |         |
|          |                             |    |          | 0.26103 |
| UPDRS II | UPDRS III OFF               | 10 | -0.39315 | 5       |
| UPDRS II | UPDRS III ON                | 33 | -0.20743 | 0.24673 |
|          |                             |    |          | 0.47897 |
| UPDRS II | UPDRS IV                    | 34 | 0.12563  | 5       |
|          |                             |    |          | 0.56507 |
| UPDRS II | LEDD                        | 34 | -0.10223 | 6       |
|          |                             |    |          | 0.62267 |
| UPDRS II | sum_walking_minutes         | 35 | -0.08615 | 2       |

|               |                             |    |          |         |
|---------------|-----------------------------|----|----------|---------|
|               |                             |    |          | 0.76655 |
| UPDRS II      | hourly_step_count_sum       | 33 | -0.05371 | 7       |
|               |                             |    | 0.15563  |         |
| UPDRS II      | sleep_efficiency            | 11 | 7        | 0.6477  |
|               |                             |    |          | 0.50233 |
| UPDRS II      | num_awakenings              | 11 | -0.22686 | 4       |
|               |                             |    | 0.02907  | 0.93237 |
| UPDRS II      | total_sleep_time_hour       | 11 | 5        | 3       |
|               | wake_after_sleep_onset_hour |    |          | 0.83310 |
| UPDRS II      | r                           | 11 | -0.07212 | 2       |
|               |                             |    | 0.10732  | 0.75346 |
| UPDRS II      | total_nrem_time_hour        | 11 | 1        | 2       |
|               |                             |    |          | 0.68479 |
| UPDRS II      | total_rem_time_hour         | 11 | -0.13844 | 3       |
|               |                             |    |          | 0.82531 |
| UPDRS II      | total_deep_nrem_time_hour   | 11 | -0.07553 | 3       |
|               |                             |    | 0.14610  |         |
| UPDRS II      | total_light_nrem_time_hour  | 11 | 2        | 0.66818 |
|               |                             |    |          | 0.73643 |
| UPDRS II      | hourly_mean_pulse_rate      | 33 | -0.06088 | 8       |
|               |                             |    | 0.06645  | 0.71783 |
| UPDRS II      | hourly_mean_rmssd           | 32 | 2        | 5       |
|               |                             |    | 0.12734  | 0.48732 |
| UPDRS II      | hourly_median_rmssd         | 32 | 8        | 8       |
|               |                             |    | 0.33637  | 0.07439 |
| UPDRS II      | hourly_rmssd_variance       | 29 | 8        | 6       |
| UPDRS III OFF | Semantic Fluency            |    |          |         |
| UPDRS III OFF | MOCA                        |    |          |         |
| UPDRS III OFF | Benton                      |    |          |         |
| UPDRS III OFF | Letter Number Sequencing    |    |          |         |
| UPDRS III OFF | HVLT Recall                 |    |          |         |
| UPDRS III OFF | HVLT Recognition            |    |          |         |
| UPDRS III OFF | HVLT Retention              |    |          |         |
| UPDRS III OFF | Symbol Digit                |    |          |         |
| UPDRS III OFF | STAI trait                  |    |          |         |
| UPDRS III OFF | STAI state                  |    |          |         |
| UPDRS III OFF | GDS                         |    |          |         |
| UPDRS III OFF | QUIP                        |    |          |         |
| UPDRS III OFF | ESS                         |    |          |         |
| UPDRS III OFF | RBDSQ                       |    |          |         |
| UPDRS III OFF | Systolic BP Drop            |    |          |         |
| UPDRS III OFF | SCOPA autonome              |    |          |         |
| UPDRS III OFF | Schwab England ADL          |    |          |         |
| UPDRS III OFF | UPDRS I                     |    |          |         |
| UPDRS III OFF | UPDRS II                    |    |          |         |
| UPDRS III OFF | UPDRS III OFF               |    |          |         |
|               |                             |    | 0.32518  | 0.43189 |
| UPDRS III OFF | UPDRS III ON                | 8  | 9        | 2       |

|               |                            |    |          |         |
|---------------|----------------------------|----|----------|---------|
| UPDRS III OFF | UPDRS IV                   | 9  | 0.14062  | 0.71820 |
|               |                            |    | 5        | 1       |
|               |                            |    | 0.30066  | 0.43177 |
| UPDRS III OFF | LEDD                       | 9  | 4        | 7       |
|               |                            |    | 0.40194  | 0.24956 |
| UPDRS III OFF | sum_walking_minutes        | 10 | 1        | 3       |
|               |                            |    |          | 0.61079 |
| UPDRS III OFF | hourly_step_count_sum      | 8  | -0.21402 | 1       |
| UPDRS III OFF | sleep_efficiency           | 1  |          |         |
| UPDRS III OFF | num_awakenings             | 1  |          |         |
| UPDRS III OFF | total_sleep_time_hour      | 1  |          |         |
|               | wake_after_sleep_onset_hou |    |          |         |
| UPDRS III OFF | r                          | 1  |          |         |
| UPDRS III OFF | total_nrem_time_hour       | 1  |          |         |
| UPDRS III OFF | total_rem_time_hour        | 1  |          |         |
| UPDRS III OFF | total_deep_nrem_time_hour  | 1  |          |         |
| UPDRS III OFF | total_light_nrem_time_hour | 1  |          |         |
|               |                            |    | 0.58015  |         |
| UPDRS III OFF | hourly_mean_pulse_rate     | 8  | 3        | 0.13165 |
|               |                            |    |          | 0.72958 |
| UPDRS III OFF | hourly_mean_rmssd          | 7  | 0.16138  | 6       |
|               |                            |    | 0.20585  | 0.65788 |
| UPDRS III OFF | hourly_median_rmssd        | 7  | 6        | 6       |
|               |                            |    | 0.47500  | 0.34108 |
| UPDRS III OFF | hourly_rmssd_variance      | 6  | 3        | 2       |
| UPDRS III ON  | Semantic Fluency           |    |          |         |
| UPDRS III ON  | MOCA                       |    |          |         |
| UPDRS III ON  | Benton                     |    |          |         |
| UPDRS III ON  | Letter Number Sequencing   |    |          |         |
| UPDRS III ON  | HVLT Recall                |    |          |         |
| UPDRS III ON  | HVLT Recognition           |    |          |         |
| UPDRS III ON  | HVLT Retention             |    |          |         |
| UPDRS III ON  | Symbol Digit               |    |          |         |
| UPDRS III ON  | STAI trait                 |    |          |         |
| UPDRS III ON  | STAI state                 |    |          |         |
| UPDRS III ON  | GDS                        |    |          |         |
| UPDRS III ON  | QUIP                       |    |          |         |
| UPDRS III ON  | ESS                        |    |          |         |
| UPDRS III ON  | RBDSQ                      |    |          |         |
| UPDRS III ON  | Systolic BP Drop           |    |          |         |
| UPDRS III ON  | SCOPA autonome             |    |          |         |
| UPDRS III ON  | Schwab England ADL         |    |          |         |
| UPDRS III ON  | UPDRS I                    |    |          |         |
| UPDRS III ON  | UPDRS II                   |    |          |         |
| UPDRS III ON  | UPDRS III OFF              |    |          |         |
| UPDRS III ON  | UPDRS III ON               |    |          |         |
|               |                            |    |          | 0.60581 |
| UPDRS III ON  | UPDRS IV                   | 33 | -0.09323 | 3       |

|              |                             |    |          |         |
|--------------|-----------------------------|----|----------|---------|
| UPDRS III ON | LEDD                        | 32 | 0.51096  | 0.00280 |
|              |                             |    | 2        | 4       |
|              |                             |    |          | 0.91626 |
| UPDRS III ON | sum_walking_minutes         | 33 | -0.01903 | 8       |
|              |                             |    |          | 0.39982 |
| UPDRS III ON | hourly_step_count_sum       | 31 | -0.15672 | 5       |
|              |                             |    | 0.34854  | 0.32362 |
| UPDRS III ON | sleep_efficiency            | 10 | 7        | 2       |
|              |                             |    | 0.21275  | 0.55509 |
| UPDRS III ON | num_awakenings              | 10 | 9        | 1       |
|              |                             |    | 0.54921  | 0.10010 |
| UPDRS III ON | total_sleep_time_hour       | 10 | 7        | 4       |
|              | wake_after_sleep_onset_hour |    | 0.06881  | 0.85018 |
| UPDRS III ON | r                           | 10 | 3        | 2       |
|              |                             |    | 0.39858  | 0.25391 |
| UPDRS III ON | total_nrem_time_hour        | 10 | 1        | 5       |
|              |                             |    | 0.78341  | 0.00734 |
| UPDRS III ON | total_rem_time_hour         | 10 | 8        | 3       |
|              |                             |    | 0.28160  | 0.43055 |
| UPDRS III ON | total_deep_nrem_time_hour   | 10 | 7        | 6       |
|              |                             |    | 0.31355  | 0.37765 |
| UPDRS III ON | total_light_nrem_time_hour  | 10 | 3        | 3       |
|              |                             |    | 0.36697  | 0.04228 |
| UPDRS III ON | hourly_mean_pulse_rate      | 31 | 4        | 2       |
|              |                             |    | 0.19331  |         |
| UPDRS III ON | hourly_mean_rmssd           | 30 | 3        | 0.30606 |
|              |                             |    | 0.19364  | 0.30520 |
| UPDRS III ON | hourly_median_rmssd         | 30 | 7        | 9       |
|              |                             |    |          | 0.14257 |
| UPDRS III ON | hourly_rmssd_variance       | 27 | -0.2898  | 4       |
| UPDRS IV     | Semantic Fluency            |    |          |         |
| UPDRS IV     | MOCA                        |    |          |         |
| UPDRS IV     | Benton                      |    |          |         |
| UPDRS IV     | Letter Number Sequencing    |    |          |         |
| UPDRS IV     | HVLT Recall                 |    |          |         |
| UPDRS IV     | HVLT Recognition            |    |          |         |
| UPDRS IV     | HVLT Retention              |    |          |         |
| UPDRS IV     | Symbol Digit                |    |          |         |
| UPDRS IV     | STAI trait                  |    |          |         |
| UPDRS IV     | STAI state                  |    |          |         |
| UPDRS IV     | GDS                         |    |          |         |
| UPDRS IV     | QUIP                        |    |          |         |
| UPDRS IV     | ESS                         |    |          |         |
| UPDRS IV     | RBDSQ                       |    |          |         |
| UPDRS IV     | Systolic BP Drop            |    |          |         |
| UPDRS IV     | SCOPA autonome              |    |          |         |
| UPDRS IV     | Schwab England ADL          |    |          |         |
| UPDRS IV     | UPDRS I                     |    |          |         |
| UPDRS IV     | UPDRS II                    |    |          |         |



|          |                             |    |          |         |
|----------|-----------------------------|----|----------|---------|
| UPDRS IV | UPDRS III OFF               |    |          |         |
| UPDRS IV | UPDRS III ON                |    |          |         |
| UPDRS IV | UPDRS IV                    |    |          |         |
|          |                             |    | 0.16825  | 0.34928 |
| UPDRS IV | LEDD                        | 33 | 4        | 6       |
|          |                             |    | 0.06276  | 0.72437 |
| UPDRS IV | sum_walking_minutes         | 34 | 1        | 6       |
|          |                             |    |          | 0.58925 |
| UPDRS IV | hourly_step_count_sum       | 32 | -0.09915 | 8       |
|          |                             |    |          | 0.36736 |
| UPDRS IV | sleep_efficiency            | 10 | 0.32001  | 8       |
|          |                             |    | 0.43617  | 0.20760 |
| UPDRS IV | num_awakenings              | 10 | 4        | 8       |
|          |                             |    | 0.01298  | 0.97159 |
| UPDRS IV | total_sleep_time_hour       | 10 | 9        | 2       |
|          | wake_after_sleep_onset_hour |    | 0.31930  |         |
| UPDRS IV | r                           | 10 | 7        | 0.36848 |
|          |                             |    | 0.03597  | 0.92140 |
| UPDRS IV | total_nrem_time_hour        | 10 | 4        | 9       |
|          |                             |    |          | 0.91556 |
| UPDRS IV | total_rem_time_hour         | 10 | -0.03866 | 6       |
|          |                             |    |          | 0.22237 |
| UPDRS IV | total_deep_nrem_time_hour   | 10 | 0.42371  | 7       |
|          |                             |    |          | 0.76950 |
| UPDRS IV | total_light_nrem_time_hour  | 10 | -0.10657 | 4       |
|          |                             |    | 0.21970  | 0.22696 |
| UPDRS IV | hourly_mean_pulse_rate      | 32 | 4        | 4       |
|          |                             |    |          | 0.74740 |
| UPDRS IV | hourly_mean_rmssd           | 31 | -0.06027 | 7       |
|          |                             |    | 0.01336  | 0.94313 |
| UPDRS IV | hourly_median_rmssd         | 31 | 1        | 1       |
|          |                             |    |          | 0.26957 |
| UPDRS IV | hourly_rmssd_variance       | 28 | -0.21602 | 6       |
| LEDD     | Semantic Fluency            |    |          |         |
| LEDD     | MOCA                        |    |          |         |
| LEDD     | Benton                      |    |          |         |
| LEDD     | Letter Number Sequencing    |    |          |         |
| LEDD     | HVLT Recall                 |    |          |         |
| LEDD     | HVLT Recognition            |    |          |         |
| LEDD     | HVLT Retention              |    |          |         |
| LEDD     | Symbol Digit                |    |          |         |
| LEDD     | STAI trait                  |    |          |         |
| LEDD     | STAI state                  |    |          |         |
| LEDD     | GDS                         |    |          |         |
| LEDD     | QUIP                        |    |          |         |
| LEDD     | ESS                         |    |          |         |
| LEDD     | RBDSQ                       |    |          |         |
| LEDD     | Systolic BP Drop            |    |          |         |
| LEDD     | SCOPA autonome              |    |          |         |

|                     |                             |    |          |         |
|---------------------|-----------------------------|----|----------|---------|
| LEDD                | Schwab England ADL          |    |          |         |
| LEDD                | UPDRS I                     |    |          |         |
| LEDD                | UPDRS II                    |    |          |         |
| LEDD                | UPDRS III OFF               |    |          |         |
| LEDD                | UPDRS III ON                |    |          |         |
| LEDD                | UPDRS IV                    |    |          |         |
| LEDD                | LEDD                        |    |          |         |
|                     |                             |    | 0.07969  | 0.65413 |
| LEDD                | sum_walking_minutes         | 34 | 4        | 7       |
|                     |                             |    |          | 0.53865 |
| LEDD                | hourly_step_count_sum       | 32 | -0.11283 | 4       |
|                     |                             |    | 0.45092  | 0.16392 |
| LEDD                | sleep_efficiency            | 11 | 5        | 2       |
|                     |                             |    |          | 0.08634 |
| LEDD                | num_awakenings              | 11 | -0.54007 | 5       |
|                     |                             |    | 0.13942  | 0.68264 |
| LEDD                | total_sleep_time_hour       | 11 | 7        | 1       |
|                     | wake_after_sleep_onset_hour |    |          |         |
| LEDD                | r                           | 11 | -0.49912 | 0.11806 |
|                     |                             |    |          | 0.64596 |
| LEDD                | total_nrem_time_hour        | 11 | 0.15645  | 3       |
|                     |                             |    | 0.08386  | 0.80633 |
| LEDD                | total_rem_time_hour         | 11 | 8        | 1       |
|                     |                             |    |          | 0.02150 |
| LEDD                | total_deep_nrem_time_hour   | 11 | 0.67931  | 5       |
|                     |                             |    |          | 0.75208 |
| LEDD                | total_light_nrem_time_hour  | 11 | -0.10794 | 1       |
|                     |                             |    | 0.23898  | 0.18773 |
| LEDD                | hourly_mean_pulse_rate      | 32 | 8        | 3       |
|                     |                             |    | 0.11764  | 0.52850 |
| LEDD                | hourly_mean_rmssd           | 31 | 3        | 6       |
|                     |                             |    | 0.14119  | 0.44867 |
| LEDD                | hourly_median_rmssd         | 31 | 2        | 4       |
|                     |                             |    |          | 0.21976 |
| LEDD                | hourly_rmssd_variance       | 29 | -0.23501 | 1       |
| sum_walking_minutes | Semantic Fluency            |    |          |         |
| sum_walking_minutes | MOCA                        |    |          |         |
| sum_walking_minutes | Benton                      |    |          |         |
| sum_walking_minutes | Letter Number Sequencing    |    |          |         |
| sum_walking_minutes | HVLT Recall                 |    |          |         |
| sum_walking_minutes | HVLT Recognition            |    |          |         |
| sum_walking_minutes | HVLT Retention              |    |          |         |
| sum_walking_minutes | Symbol Digit                |    |          |         |
| sum_walking_minutes | STAI trait                  |    |          |         |
| sum_walking_minutes | STAI state                  |    |          |         |
| sum_walking_minutes | GDS                         |    |          |         |
| sum_walking_minutes | QUIP                        |    |          |         |
| sum_walking_minutes | ESS                         |    |          |         |
| sum_walking_minutes | RBDSQ                       |    |          |         |

|                       |                             |    |          |          |
|-----------------------|-----------------------------|----|----------|----------|
| sum_walking_minutes   | Systolic BP Drop            |    |          |          |
| sum_walking_minutes   | SCOPA autonome              |    |          |          |
| sum_walking_minutes   | Schwab England ADL          |    |          |          |
| sum_walking_minutes   | UPDRS I                     |    |          |          |
| sum_walking_minutes   | UPDRS II                    |    |          |          |
| sum_walking_minutes   | UPDRS III OFF               |    |          |          |
| sum_walking_minutes   | UPDRS III ON                |    |          |          |
| sum_walking_minutes   | UPDRS IV                    |    |          |          |
| sum_walking_minutes   | LEDD                        |    |          |          |
| sum_walking_minutes   | sum_walking_minutes         |    | 0.84292  |          |
| sum_walking_minutes   | hourly_step_count_sum       | 33 | 9        | 7.53E-10 |
|                       |                             |    | 0.15741  | 0.64389  |
| sum_walking_minutes   | sleep_efficiency            | 11 | 9        | 7        |
| sum_walking_minutes   | num_awakenings              | 11 | -0.61583 | 0.04367  |
|                       |                             |    |          | 0.75863  |
| sum_walking_minutes   | total_sleep_time_hour       | 11 | -0.10501 | 7        |
| sum_walking_minutes   | wake_after_sleep_onset_hour | 11 | -0.65963 | 0.02722  |
|                       |                             |    |          | 6        |
|                       |                             |    |          | 0.73883  |
| sum_walking_minutes   | total_nrem_time_hour        | 11 | -0.11388 | 9        |
|                       |                             |    |          | 0.83472  |
| sum_walking_minutes   | total_rem_time_hour         | 11 | -0.07141 | 1        |
|                       |                             |    | 0.48914  | 0.12677  |
| sum_walking_minutes   | total_deep_nrem_time_hour   | 11 | 3        | 7        |
|                       |                             |    |          | 0.33532  |
| sum_walking_minutes   | total_light_nrem_time_hour  | 11 | -0.3213  | 2        |
|                       |                             |    | 0.40490  | 0.01941  |
| sum_walking_minutes   | hourly_mean_pulse_rate      | 33 | 6        | 7        |
| sum_walking_minutes   | hourly_mean_rmssd           | 32 | -0.26671 | 0.14005  |
|                       |                             |    |          | 0.15685  |
| sum_walking_minutes   | hourly_median_rmssd         | 32 | -0.25626 | 9        |
|                       |                             |    |          | 0.60593  |
| sum_walking_minutes   | hourly_rmssd_variance       | 29 | -0.09995 | 9        |
| hourly_step_count_sum | Semantic Fluency            |    |          |          |
| hourly_step_count_sum | MOCA                        |    |          |          |
| hourly_step_count_sum | Benton                      |    |          |          |
| hourly_step_count_sum | Letter Number Sequencing    |    |          |          |
| hourly_step_count_sum | HVLT Recall                 |    |          |          |
| hourly_step_count_sum | HVLT Recognition            |    |          |          |
| hourly_step_count_sum | HVLT Retention              |    |          |          |
| hourly_step_count_sum | Symbol Digit                |    |          |          |
| hourly_step_count_sum | STAI trait                  |    |          |          |
| hourly_step_count_sum | STAI state                  |    |          |          |
| hourly_step_count_sum | GDS                         |    |          |          |
| hourly_step_count_sum | QUIP                        |    |          |          |
| hourly_step_count_sum | ESS                         |    |          |          |
| hourly_step_count_sum | RBDSQ                       |    |          |          |

|                       |                             |    |          |   |         |
|-----------------------|-----------------------------|----|----------|---|---------|
| hourly_step_count_sum | Systolic BP Drop            |    |          |   |         |
| hourly_step_count_sum | SCOPA autonome              |    |          |   |         |
| hourly_step_count_sum | Schwab England ADL          |    |          |   |         |
| hourly_step_count_sum | UPDRS I                     |    |          |   |         |
| hourly_step_count_sum | UPDRS II                    |    |          |   |         |
| hourly_step_count_sum | UPDRS III OFF               |    |          |   |         |
| hourly_step_count_sum | UPDRS III ON                |    |          |   |         |
| hourly_step_count_sum | UPDRS IV                    |    |          |   |         |
| hourly_step_count_sum | LEDD                        |    |          |   |         |
| hourly_step_count_sum | sum_walking_minutes         |    |          |   |         |
| hourly_step_count_sum | hourly_step_count_sum       |    |          |   | 0.47440 |
| hourly_step_count_sum | sleep_efficiency            | 11 | -0.24147 | 5 | 0.01814 |
| hourly_step_count_sum | num_awakenings              | 11 | -0.69269 | 1 | 0.22444 |
| hourly_step_count_sum | total_sleep_time_hour       | 11 | -0.39876 | 4 | 0.04011 |
| hourly_step_count_sum | wake_after_sleep_onset_hour | 11 | -0.62416 | 7 | 0.26694 |
| hourly_step_count_sum | total_nrem_time_hour        | 11 | -0.36696 | 6 | 0.21305 |
| hourly_step_count_sum | total_rem_time_hour         | 11 | -0.40786 | 5 | 0.95174 |
| hourly_step_count_sum | total_deep_nrem_time_hour   | 11 | 7        | 3 | 0.21908 |
| hourly_step_count_sum | total_light_nrem_time_hour  | 11 | -0.403   | 9 | 0.18269 |
| hourly_step_count_sum | hourly_mean_pulse_rate      | 33 | 2        | 9 | 0.13623 |
| hourly_step_count_sum | hourly_mean_rmssd           | 32 | -0.26921 | 6 | 0.13798 |
| hourly_step_count_sum | hourly_median_rmssd         | 32 | -0.26806 | 7 | 0.75087 |
| hourly_step_count_sum | hourly_rmssd_variance       | 29 | 1        | 1 |         |
| sleep_efficiency      | Semantic Fluency            |    |          |   |         |
| sleep_efficiency      | MOCA                        |    |          |   |         |
| sleep_efficiency      | Benton                      |    |          |   |         |
| sleep_efficiency      | Letter Number Sequencing    |    |          |   |         |
| sleep_efficiency      | HVLT Recall                 |    |          |   |         |
| sleep_efficiency      | HVLT Recognition            |    |          |   |         |
| sleep_efficiency      | HVLT Retention              |    |          |   |         |
| sleep_efficiency      | Symbol Digit                |    |          |   |         |
| sleep_efficiency      | STAI trait                  |    |          |   |         |
| sleep_efficiency      | STAI state                  |    |          |   |         |
| sleep_efficiency      | GDS                         |    |          |   |         |
| sleep_efficiency      | QUIP                        |    |          |   |         |
| sleep_efficiency      | ESS                         |    |          |   |         |
| sleep_efficiency      | RBDSQ                       |    |          |   |         |

|                  |                             |    |          |         |
|------------------|-----------------------------|----|----------|---------|
| sleep_efficiency | Systolic BP Drop            |    |          |         |
| sleep_efficiency | SCOPA autonome              |    |          |         |
| sleep_efficiency | Schwab England ADL          |    |          |         |
| sleep_efficiency | UPDRS I                     |    |          |         |
| sleep_efficiency | UPDRS II                    |    |          |         |
| sleep_efficiency | UPDRS III OFF               |    |          |         |
| sleep_efficiency | UPDRS III ON                |    |          |         |
| sleep_efficiency | UPDRS IV                    |    |          |         |
| sleep_efficiency | LEDD                        |    |          |         |
| sleep_efficiency | sum_walking_minutes         |    |          |         |
| sleep_efficiency | hourly_step_count_sum       |    |          |         |
| sleep_efficiency | sleep_efficiency            |    | 0.01395  | 0.96751 |
| sleep_efficiency | num_awakenings              | 11 | 7        | 3       |
|                  |                             |    | 0.79218  | 0.00365 |
| sleep_efficiency | total_sleep_time_hour       | 11 | 6        | 1       |
|                  | wake_after_sleep_onset_hour |    |          | 0.69375 |
| sleep_efficiency | r                           | 11 | -0.13432 | 9       |
|                  |                             |    | 0.81218  | 0.00238 |
| sleep_efficiency | total_nrem_time_hour        | 11 | 5        | 9       |
|                  |                             |    | 0.63667  | 0.03516 |
| sleep_efficiency | total_rem_time_hour         | 11 | 6        | 9       |
|                  |                             |    | 0.49398  | 0.12249 |
| sleep_efficiency | total_deep_nrem_time_hour   | 11 | 9        | 2       |
|                  |                             |    | 0.67247  | 0.02338 |
| sleep_efficiency | total_light_nrem_time_hour  | 11 | 1        | 5       |
|                  |                             |    |          | 0.39391 |
| sleep_efficiency | hourly_mean_pulse_rate      | 11 | -0.28599 | 1       |
|                  |                             |    | 0.20410  | 0.54718 |
| sleep_efficiency | hourly_mean_rmssd           | 11 | 6        | 4       |
|                  |                             |    | 0.21640  | 0.52273 |
| sleep_efficiency | hourly_median_rmssd         | 11 | 8        | 5       |
|                  |                             |    | 0.02465  | 0.94262 |
| sleep_efficiency | hourly_rmssd_variance       | 11 | 9        | 9       |
| num_awakenings   | Semantic Fluency            |    |          |         |
| num_awakenings   | MOCA                        |    |          |         |
| num_awakenings   | Benton                      |    |          |         |
| num_awakenings   | Letter Number Sequencing    |    |          |         |
| num_awakenings   | HVLT Recall                 |    |          |         |
| num_awakenings   | HVLT Recognition            |    |          |         |
| num_awakenings   | HVLT Retention              |    |          |         |
| num_awakenings   | Symbol Digit                |    |          |         |
| num_awakenings   | STAI trait                  |    |          |         |
| num_awakenings   | STAI state                  |    |          |         |
| num_awakenings   | GDS                         |    |          |         |
| num_awakenings   | QUIP                        |    |          |         |
| num_awakenings   | ESS                         |    |          |         |
| num_awakenings   | RBDSQ                       |    |          |         |

|                       |                             |    |          |          |
|-----------------------|-----------------------------|----|----------|----------|
| num awakenings        | Systolic BP Drop            |    |          |          |
| num awakenings        | SCOPA autonome              |    |          |          |
| num awakenings        | Schwab England ADL          |    |          |          |
| num awakenings        | UPDRS I                     |    |          |          |
| num awakenings        | UPDRS II                    |    |          |          |
| num awakenings        | UPDRS III OFF               |    |          |          |
| num awakenings        | UPDRS III ON                |    |          |          |
| num awakenings        | UPDRS IV                    |    |          |          |
| num awakenings        | LEDD                        |    |          |          |
| num awakenings        | sum_walking_minutes         |    |          |          |
| num awakenings        | hourly_step_count_sum       |    |          |          |
| num awakenings        | sleep_efficiency            |    |          |          |
| num awakenings        | num awakenings              |    | 0.23031  | 0.49567  |
| num awakenings        | total_sleep_time_hour       | 11 | 1        | 5        |
| num awakenings        | wake_after_sleep_onset_hour | 11 | 0.94792  |          |
| num awakenings        |                             | 11 | 6        | 9.11E-06 |
| num awakenings        | total_nrem_time_hour        | 11 | 0.25406  | 0.45091  |
| num awakenings        |                             | 11 | 6        | 9        |
| num awakenings        | total_rem_time_hour         | 11 | 0.14764  | 0.66484  |
| num awakenings        |                             | 11 | 9        | 3        |
| num awakenings        | total_deep_nrem_time_hour   | 11 | -0.02574 | 0.94011  |
| num awakenings        |                             | 11 | 0.28364  | 6        |
| num awakenings        | total_light_nrem_time_hour  | 11 | 6        | 0.39796  |
| num awakenings        |                             | 11 | 6        | 5        |
| num awakenings        | hourly_mean_pulse_rate      | 11 | -0.44399 | 0.17131  |
| num awakenings        |                             | 11 | 0.16864  | 1        |
| num awakenings        | hourly_mean_rmssd           | 11 | 7        | 0.62010  |
| num awakenings        |                             | 11 | 0.20672  | 9        |
| num awakenings        | hourly_median_rmssd         | 11 | 9        | 0.54193  |
| num awakenings        |                             | 11 |          | 3        |
| num awakenings        | hourly_rmssd_variance       | 11 | -0.46617 | 0.14838  |
| total_sleep_time_hour | Semantic Fluency            |    |          | 6        |
| total_sleep_time_hour | MOCA                        |    |          |          |
| total_sleep_time_hour | Benton                      |    |          |          |
| total_sleep_time_hour | Letter Number Sequencing    |    |          |          |
| total_sleep_time_hour | HVLT Recall                 |    |          |          |
| total_sleep_time_hour | HVLT Recognition            |    |          |          |
| total_sleep_time_hour | HVLT Retention              |    |          |          |
| total_sleep_time_hour | Symbol Digit                |    |          |          |
| total_sleep_time_hour | STAI trait                  |    |          |          |
| total_sleep_time_hour | STAI state                  |    |          |          |
| total_sleep_time_hour | GDS                         |    |          |          |
| total_sleep_time_hour | QUIP                        |    |          |          |
| total_sleep_time_hour | ESS                         |    |          |          |
| total_sleep_time_hour | RBDSQ                       |    |          |          |
| total_sleep_time_hour | Systolic BP Drop            |    |          |          |

|                             |                             |    |          |          |
|-----------------------------|-----------------------------|----|----------|----------|
| total_sleep_time_hour       | SCOPA autonome              |    |          |          |
| total_sleep_time_hour       | Schwab England ADL          |    |          |          |
| total_sleep_time_hour       | UPDRS I                     |    |          |          |
| total_sleep_time_hour       | UPDRS II                    |    |          |          |
| total_sleep_time_hour       | UPDRS III OFF               |    |          |          |
| total_sleep_time_hour       | UPDRS III ON                |    |          |          |
| total_sleep_time_hour       | UPDRS IV                    |    |          |          |
| total_sleep_time_hour       | LEDD                        |    |          |          |
| total_sleep_time_hour       | sum_walking_minutes         |    |          |          |
| total_sleep_time_hour       | hourly_step_count_sum       |    |          |          |
| total_sleep_time_hour       | sleep_efficiency            |    |          |          |
| total_sleep_time_hour       | num_awakenings              |    |          |          |
| total_sleep_time_hour       | total_sleep_time_hour       |    |          |          |
| total_sleep_time_hour       | wake_after_sleep_onset_hour | 11 | 0.11222  | 0.74251  |
| total_sleep_time_hour       | total_nrem_time_hour        | 11 | 0.97831  | 1.85E-07 |
| total_sleep_time_hour       | total_rem_time_hour         | 11 | 0.90167  | 0.00014  |
| total_sleep_time_hour       | total_deep_nrem_time_hour   | 11 | 0.41934  | 0.19919  |
| total_sleep_time_hour       | total_light_nrem_time_hour  | 11 | 0.88144  | 0.00033  |
| total_sleep_time_hour       | hourly_mean_pulse_rate      | 11 | -0.47231 | 0.14240  |
| total_sleep_time_hour       | hourly_mean_rmssd           | 11 | 0.18247  | 0.59124  |
| total_sleep_time_hour       | hourly_median_rmssd         | 11 | 0.19575  | 0.8      |
| total_sleep_time_hour       | hourly_rmssd_variance       | 11 | 0.56404  | 0.21580  |
| wake_after_sleep_onset_hour | hourly_rmssd_variance       | 11 | -0.40564 | 5        |
| wake_after_sleep_onset_hour | Semantic Fluency            |    |          |          |
| wake_after_sleep_onset_hour | MOCA                        |    |          |          |
| wake_after_sleep_onset_hour | Benton                      |    |          |          |
| wake_after_sleep_onset_hour | Letter Number Sequencing    |    |          |          |
| wake_after_sleep_onset_hour | HVLT Recall                 |    |          |          |
| wake_after_sleep_onset_hour | HVLT Recognition            |    |          |          |
| wake_after_sleep_onset_hour | HVLT Retention              |    |          |          |
| wake_after_sleep_onset_hour | Symbol Digit                |    |          |          |
| wake_after_sleep_onset_hour | STAI trait                  |    |          |          |
| wake_after_sleep_onset_hour | STAI state                  |    |          |          |

|                             |                             |    |          |           |
|-----------------------------|-----------------------------|----|----------|-----------|
| wake_after_sleep_onset_hour | GDS                         |    |          |           |
| wake_after_sleep_onset_hour | QUIP                        |    |          |           |
| wake_after_sleep_onset_hour | ESS                         |    |          |           |
| wake_after_sleep_onset_hour | RBDSQ                       |    |          |           |
| wake_after_sleep_onset_hour | Systolic BP Drop            |    |          |           |
| wake_after_sleep_onset_hour | SCOPA autonome              |    |          |           |
| wake_after_sleep_onset_hour | Schwab England ADL          |    |          |           |
| wake_after_sleep_onset_hour | UPDRS I                     |    |          |           |
| wake_after_sleep_onset_hour | UPDRS II                    |    |          |           |
| wake_after_sleep_onset_hour | UPDRS III OFF               |    |          |           |
| wake_after_sleep_onset_hour | UPDRS III ON                |    |          |           |
| wake_after_sleep_onset_hour | UPDRS IV                    |    |          |           |
| wake_after_sleep_onset_hour | LEDD                        |    |          |           |
| wake_after_sleep_onset_hour | sum_walking_minutes         |    |          |           |
| wake_after_sleep_onset_hour | hourly_step_count_sum       |    |          |           |
| wake_after_sleep_onset_hour | sleep_efficiency            |    |          |           |
| wake_after_sleep_onset_hour | num_awakenings              |    |          |           |
| wake_after_sleep_onset_hour | total_sleep_time_hour       |    |          |           |
| wake_after_sleep_onset_hour | wake_after_sleep_onset_hour |    |          |           |
| wake_after_sleep_onset_hour | total_nrem_time_hour        | 11 | 0.17544  | 1 0.60587 |
| wake_after_sleep_onset_hour | total_rem_time_hour         | 11 | -0.03584 | 0.91667 3 |
| wake_after_sleep_onset_hour | total_deep_nrem_time_hour   | 11 | -0.107   | 0.75418 5 |
| wake_after_sleep_onset_hour | total_light_nrem_time_hour  | 11 | 0.23213  | 0.49216 4 |
| wake_after_sleep_onset_hour | hourly_mean_pulse_rate      | 11 | -0.43541 | 0.18072 9 |
| wake_after_sleep_onset_hour | hourly_mean_rmssd           | 11 | 0.22731  | 0.50145 7 |



|                             |                             |    |          |          |
|-----------------------------|-----------------------------|----|----------|----------|
| wake_after_sleep_onset_hour |                             |    | 0.26677  | 0.42777  |
| r                           | hourly_median_rmssd         | 11 | 5        | 9        |
| wake_after_sleep_onset_hour |                             |    |          | 0.21554  |
| r                           | hourly_rmssd_variance       | 11 | -0.40585 | 4        |
| total_nrem_time_hour        | Semantic Fluency            |    |          |          |
| total_nrem_time_hour        | MOCA                        |    |          |          |
| total_nrem_time_hour        | Benton                      |    |          |          |
| total_nrem_time_hour        | Letter Number Sequencing    |    |          |          |
| total_nrem_time_hour        | HVLT Recall                 |    |          |          |
| total_nrem_time_hour        | HVLT Recognition            |    |          |          |
| total_nrem_time_hour        | HVLT Retention              |    |          |          |
| total_nrem_time_hour        | Symbol Digit                |    |          |          |
| total_nrem_time_hour        | STAI trait                  |    |          |          |
| total_nrem_time_hour        | STAI state                  |    |          |          |
| total_nrem_time_hour        | GDS                         |    |          |          |
| total_nrem_time_hour        | QUIP                        |    |          |          |
| total_nrem_time_hour        | ESS                         |    |          |          |
| total_nrem_time_hour        | RBDSQ                       |    |          |          |
| total_nrem_time_hour        | Systolic BP Drop            |    |          |          |
| total_nrem_time_hour        | SCOPA autonome              |    |          |          |
| total_nrem_time_hour        | Schwab England ADL          |    |          |          |
| total_nrem_time_hour        | UPDRS I                     |    |          |          |
| total_nrem_time_hour        | UPDRS II                    |    |          |          |
| total_nrem_time_hour        | UPDRS III OFF               |    |          |          |
| total_nrem_time_hour        | UPDRS III ON                |    |          |          |
| total_nrem_time_hour        | UPDRS IV                    |    |          |          |
| total_nrem_time_hour        | LEDD                        |    |          |          |
| total_nrem_time_hour        | sum_walking_minutes         |    |          |          |
| total_nrem_time_hour        | hourly_step_count_sum       |    |          |          |
| total_nrem_time_hour        | sleep_efficiency            |    |          |          |
| total_nrem_time_hour        | num_awakenings              |    |          |          |
| total_nrem_time_hour        | total_sleep_time_hour       |    |          |          |
| total_nrem_time_hour        | wake_after_sleep_onset_hour |    |          |          |
| total_nrem_time_hour        | total_nrem_time_hour        |    |          |          |
|                             |                             |    | 0.79254  | 0.00362  |
| total_nrem_time_hour        | total_rem_time_hour         | 11 | 3        | 5        |
|                             |                             |    | 0.36764  | 0.26599  |
| total_nrem_time_hour        | total_deep_nrem_time_hour   | 11 | 3        | 3        |
|                             |                             |    | 0.92578  |          |
| total_nrem_time_hour        | total_light_nrem_time_hour  | 11 | 1        | 4.34E-05 |
|                             |                             |    |          | 0.17448  |
| total_nrem_time_hour        | hourly_mean_pulse_rate      | 11 | -0.44106 | 8        |
|                             |                             |    | 0.22130  | 0.51313  |
| total_nrem_time_hour        | hourly_mean_rmssd           | 11 | 3        | 7        |
|                             |                             |    | 0.23927  | 0.47856  |
| total_nrem_time_hour        | hourly_median_rmssd         | 11 | 2        | 9        |
|                             |                             |    |          | 0.31343  |
| total_nrem_time_hour        | hourly_rmssd_variance       | 11 | -0.33531 | 6        |

|                           |                             |    |          |         |
|---------------------------|-----------------------------|----|----------|---------|
| total_rem_time_hour       | Semantic Fluency            |    |          |         |
| total_rem_time_hour       | MOCA                        |    |          |         |
| total_rem_time_hour       | Benton                      |    |          |         |
| total_rem_time_hour       | Letter Number Sequencing    |    |          |         |
| total_rem_time_hour       | HVLT Recall                 |    |          |         |
| total_rem_time_hour       | HVLT Recognition            |    |          |         |
| total_rem_time_hour       | HVLT Retention              |    |          |         |
| total_rem_time_hour       | Symbol Digit                |    |          |         |
| total_rem_time_hour       | STAI trait                  |    |          |         |
| total_rem_time_hour       | STAI state                  |    |          |         |
| total_rem_time_hour       | GDS                         |    |          |         |
| total_rem_time_hour       | QUIP                        |    |          |         |
| total_rem_time_hour       | ESS                         |    |          |         |
| total_rem_time_hour       | RBDSQ                       |    |          |         |
| total_rem_time_hour       | Systolic BP Drop            |    |          |         |
| total_rem_time_hour       | SCOPA autonome              |    |          |         |
| total_rem_time_hour       | Schwab England ADL          |    |          |         |
| total_rem_time_hour       | UPDRS I                     |    |          |         |
| total_rem_time_hour       | UPDRS II                    |    |          |         |
| total_rem_time_hour       | UPDRS III OFF               |    |          |         |
| total_rem_time_hour       | UPDRS III ON                |    |          |         |
| total_rem_time_hour       | UPDRS IV                    |    |          |         |
| total_rem_time_hour       | LEDD                        |    |          |         |
| total_rem_time_hour       | sum_walking_minutes         |    |          |         |
| total_rem_time_hour       | hourly_step_count_sum       |    |          |         |
| total_rem_time_hour       | sleep_efficiency            |    |          |         |
| total_rem_time_hour       | num_awakenings              |    |          |         |
| total_rem_time_hour       | total_sleep_time_hour       |    |          |         |
| total_rem_time_hour       | wake_after_sleep_onset_hour |    |          |         |
| total_rem_time_hour       | total_nrem_time_hour        |    |          |         |
| total_rem_time_hour       | total_rem_time_hour         |    | 0.46705  | 0.14751 |
| total_rem_time_hour       | total_deep_nrem_time_hour   | 11 | 1        | 8       |
| total_rem_time_hour       | total_light_nrem_time_hour  | 11 | 2        | 4       |
| total_rem_time_hour       | hourly_mean_pulse_rate      | 11 | -0.4697  | 5       |
| total_rem_time_hour       | hourly_mean_rmssd           | 11 | 0.07523  | 1       |
| total_rem_time_hour       | hourly_median_rmssd         | 11 | 0.07680  | 0.82241 |
| total_rem_time_hour       | hourly_rmssd_variance       | 11 | -0.49419 | 4       |
| total_deep_nrem_time_hour | Semantic Fluency            |    |          |         |
| total_deep_nrem_time_hour | MOCA                        |    |          |         |
| total_deep_nrem_time_hour | Benton                      |    |          |         |
| total_deep_nrem_time_hour | Letter Number Sequencing    |    |          |         |

|                            |                             |    |          |         |
|----------------------------|-----------------------------|----|----------|---------|
| total_deep_nrem_time_hour  | HVLT Recall                 |    |          |         |
| total_deep_nrem_time_hour  | HVLT Recognition            |    |          |         |
| total_deep_nrem_time_hour  | HVLT Retention              |    |          |         |
| total_deep_nrem_time_hour  | Symbol Digit                |    |          |         |
| total_deep_nrem_time_hour  | STAI trait                  |    |          |         |
| total_deep_nrem_time_hour  | STAI state                  |    |          |         |
| total_deep_nrem_time_hour  | GDS                         |    |          |         |
| total_deep_nrem_time_hour  | QUIP                        |    |          |         |
| total_deep_nrem_time_hour  | ESS                         |    |          |         |
| total_deep_nrem_time_hour  | RBDSQ                       |    |          |         |
| total_deep_nrem_time_hour  | Systolic BP Drop            |    |          |         |
| total_deep_nrem_time_hour  | SCOPA autonome              |    |          |         |
| total_deep_nrem_time_hour  | Schwab England ADL          |    |          |         |
| total_deep_nrem_time_hour  | UPDRS I                     |    |          |         |
| total_deep_nrem_time_hour  | UPDRS II                    |    |          |         |
| total_deep_nrem_time_hour  | UPDRS III OFF               |    |          |         |
| total_deep_nrem_time_hour  | UPDRS III ON                |    |          |         |
| total_deep_nrem_time_hour  | UPDRS IV                    |    |          |         |
| total_deep_nrem_time_hour  | LEDD                        |    |          |         |
| total_deep_nrem_time_hour  | sum_walking_minutes         |    |          |         |
| total_deep_nrem_time_hour  | hourly_step_count_sum       |    |          |         |
| total_deep_nrem_time_hour  | sleep_efficiency            |    |          |         |
| total_deep_nrem_time_hour  | num_awakenings              |    |          |         |
| total_deep_nrem_time_hour  | total_sleep_time_hour       |    |          |         |
| total_deep_nrem_time_hour  | wake_after_sleep_onset_hour |    |          |         |
| total_deep_nrem_time_hour  | total_nrem_time_hour        |    |          |         |
| total_deep_nrem_time_hour  | total_rem_time_hour         |    |          |         |
| total_deep_nrem_time_hour  | total_deep_nrem_time_hour   |    |          | 0.97386 |
| total_deep_nrem_time_hour  | total_light_nrem_time_hour  | 11 | -0.01123 | 4       |
|                            |                             |    |          | 0.38293 |
| total_deep_nrem_time_hour  | hourly_mean_pulse_rate      | 11 | -0.29239 | 2       |
|                            |                             |    | 0.26346  | 0.43375 |
| total_deep_nrem_time_hour  | hourly_mean_rmssd           | 11 | 4        | 2       |
|                            |                             |    | 0.26945  | 0.42296 |
| total_deep_nrem_time_hour  | hourly_median_rmssd         | 11 | 9        | 6       |
|                            |                             |    | 0.04925  | 0.88565 |
| total_deep_nrem_time_hour  | hourly_rmssd_variance       | 11 | 2        | 5       |
| total_light_nrem_time_hour | Semantic Fluency            |    |          |         |
| total_light_nrem_time_hour | MOCA                        |    |          |         |
| total_light_nrem_time_hour | Benton                      |    |          |         |
| total_light_nrem_time_hour | Letter Number Sequencing    |    |          |         |
| total_light_nrem_time_hour | HVLT Recall                 |    |          |         |
| total_light_nrem_time_hour | HVLT Recognition            |    |          |         |
| total_light_nrem_time_hour | HVLT Retention              |    |          |         |
| total_light_nrem_time_hour | Symbol Digit                |    |          |         |
| total_light_nrem_time_hour | STAI trait                  |    |          |         |

|                            |                             |    |          |         |         |
|----------------------------|-----------------------------|----|----------|---------|---------|
| total_light_nrem_time_hour | STAI state                  |    |          |         |         |
| total_light_nrem_time_hour | GDS                         |    |          |         |         |
| total_light_nrem_time_hour | QUIP                        |    |          |         |         |
| total_light_nrem_time_hour | ESS                         |    |          |         |         |
| total_light_nrem_time_hour | RBDSQ                       |    |          |         |         |
| total_light_nrem_time_hour | Systolic BP Drop            |    |          |         |         |
| total_light_nrem_time_hour | SCOPA autonome              |    |          |         |         |
| total_light_nrem_time_hour | Schwab England ADL          |    |          |         |         |
| total_light_nrem_time_hour | UPDRS I                     |    |          |         |         |
| total_light_nrem_time_hour | UPDRS II                    |    |          |         |         |
| total_light_nrem_time_hour | UPDRS III OFF               |    |          |         |         |
| total_light_nrem_time_hour | UPDRS III ON                |    |          |         |         |
| total_light_nrem_time_hour | UPDRS IV                    |    |          |         |         |
| total_light_nrem_time_hour | LEDD                        |    |          |         |         |
| total_light_nrem_time_hour | sum_walking_minutes         |    |          |         |         |
| total_light_nrem_time_hour | hourly_step_count_sum       |    |          |         |         |
| total_light_nrem_time_hour | sleep_efficiency            |    |          |         |         |
| total_light_nrem_time_hour | num_awakenings              |    |          |         |         |
| total_light_nrem_time_hour | total_sleep_time_hour       |    |          |         |         |
| total_light_nrem_time_hour | wake_after_sleep_onset_hour |    |          |         |         |
| total_light_nrem_time_hour | total_nrem_time_hour        |    |          |         |         |
| total_light_nrem_time_hour | total_rem_time_hour         |    |          |         |         |
| total_light_nrem_time_hour | total_deep_nrem_time_hour   |    |          |         |         |
| total_light_nrem_time_hour | total_light_nrem_time_hour  |    |          |         | 0.28347 |
| total_light_nrem_time_hour | hourly_mean_pulse_rate      | 11 | -0.35538 | 7       |         |
|                            |                             |    | 0.13084  | 0.70136 |         |
| total_light_nrem_time_hour | hourly_mean_rmssd           | 11 | 7        | 8       |         |
|                            |                             |    |          | 0.66466 |         |
| total_light_nrem_time_hour | hourly_median_rmssd         | 11 | 0.14773  | 8       |         |
|                            |                             |    |          | 0.24824 |         |
| total_light_nrem_time_hour | hourly_rmssd_variance       | 11 | -0.38056 | 7       |         |
| hourly_mean_pulse_rate     | Semantic Fluency            |    |          |         |         |
| hourly_mean_pulse_rate     | MOCA                        |    |          |         |         |
| hourly_mean_pulse_rate     | Benton                      |    |          |         |         |
| hourly_mean_pulse_rate     | Letter Number Sequencing    |    |          |         |         |
| hourly_mean_pulse_rate     | HVLT Recall                 |    |          |         |         |
| hourly_mean_pulse_rate     | HVLT Recognition            |    |          |         |         |
| hourly_mean_pulse_rate     | HVLT Retention              |    |          |         |         |
| hourly_mean_pulse_rate     | Symbol Digit                |    |          |         |         |
| hourly_mean_pulse_rate     | STAI trait                  |    |          |         |         |
| hourly_mean_pulse_rate     | STAI state                  |    |          |         |         |
| hourly_mean_pulse_rate     | GDS                         |    |          |         |         |
| hourly_mean_pulse_rate     | QUIP                        |    |          |         |         |
| hourly_mean_pulse_rate     | ESS                         |    |          |         |         |
| hourly_mean_pulse_rate     | RBDSQ                       |    |          |         |         |
| hourly_mean_pulse_rate     | Systolic BP Drop            |    |          |         |         |

|                        |                             |    |          |         |         |
|------------------------|-----------------------------|----|----------|---------|---------|
| hourly_mean_pulse_rate | SCOPA autonome              |    |          |         |         |
| hourly_mean_pulse_rate | Schwab England ADL          |    |          |         |         |
| hourly_mean_pulse_rate | UPDRS I                     |    |          |         |         |
| hourly_mean_pulse_rate | UPDRS II                    |    |          |         |         |
| hourly_mean_pulse_rate | UPDRS III OFF               |    |          |         |         |
| hourly_mean_pulse_rate | UPDRS III ON                |    |          |         |         |
| hourly_mean_pulse_rate | UPDRS IV                    |    |          |         |         |
| hourly_mean_pulse_rate | LEDD                        |    |          |         |         |
| hourly_mean_pulse_rate | sum_walking_minutes         |    |          |         |         |
| hourly_mean_pulse_rate | hourly_step_count_sum       |    |          |         |         |
| hourly_mean_pulse_rate | sleep_efficiency            |    |          |         |         |
| hourly_mean_pulse_rate | num_awakenings              |    |          |         |         |
| hourly_mean_pulse_rate | total_sleep_time_hour       |    |          |         |         |
| hourly_mean_pulse_rate | wake_after_sleep_onset_hour |    |          |         |         |
| hourly_mean_pulse_rate | total_nrem_time_hour        |    |          |         |         |
| hourly_mean_pulse_rate | total_rem_time_hour         |    |          |         |         |
| hourly_mean_pulse_rate | total_deep_nrem_time_hour   |    |          |         |         |
| hourly_mean_pulse_rate | total_light_nrem_time_hour  |    |          |         |         |
| hourly_mean_pulse_rate | hourly_mean_pulse_rate      |    |          | 0.22699 |         |
| hourly_mean_pulse_rate | hourly_mean_rmssd           | 32 | -0.21969 | 6       | 0.27249 |
| hourly_mean_pulse_rate | hourly_median_rmssd         | 32 | -0.19997 | 6       | 0.33065 |
| hourly_mean_pulse_rate | hourly_rmssd_variance       | 29 | -0.18728 | 8       |         |
| hourly_mean_rmssd      | Semantic Fluency            |    |          |         |         |
| hourly_mean_rmssd      | MOCA                        |    |          |         |         |
| hourly_mean_rmssd      | Benton                      |    |          |         |         |
| hourly_mean_rmssd      | Letter Number Sequencing    |    |          |         |         |
| hourly_mean_rmssd      | HVLT Recall                 |    |          |         |         |
| hourly_mean_rmssd      | HVLT Recognition            |    |          |         |         |
| hourly_mean_rmssd      | HVLT Retention              |    |          |         |         |
| hourly_mean_rmssd      | Symbol Digit                |    |          |         |         |
| hourly_mean_rmssd      | STAI trait                  |    |          |         |         |
| hourly_mean_rmssd      | STAI state                  |    |          |         |         |
| hourly_mean_rmssd      | GDS                         |    |          |         |         |
| hourly_mean_rmssd      | QUIP                        |    |          |         |         |
| hourly_mean_rmssd      | ESS                         |    |          |         |         |
| hourly_mean_rmssd      | RBDSQ                       |    |          |         |         |
| hourly_mean_rmssd      | Systolic BP Drop            |    |          |         |         |
| hourly_mean_rmssd      | SCOPA autonome              |    |          |         |         |
| hourly_mean_rmssd      | Schwab England ADL          |    |          |         |         |
| hourly_mean_rmssd      | UPDRS I                     |    |          |         |         |
| hourly_mean_rmssd      | UPDRS II                    |    |          |         |         |
| hourly_mean_rmssd      | UPDRS III OFF               |    |          |         |         |
| hourly_mean_rmssd      | UPDRS III ON                |    |          |         |         |
| hourly_mean_rmssd      | UPDRS IV                    |    |          |         |         |

|                     |                             |    |         |         |
|---------------------|-----------------------------|----|---------|---------|
| hourly_mean_rmssd   | LEDD                        |    |         |         |
| hourly_mean_rmssd   | sum_walking_minutes         |    |         |         |
| hourly_mean_rmssd   | hourly_step_count_sum       |    |         |         |
| hourly_mean_rmssd   | sleep_efficiency            |    |         |         |
| hourly_mean_rmssd   | num_awakenings              |    |         |         |
| hourly_mean_rmssd   | total_sleep_time_hour       |    |         |         |
| hourly_mean_rmssd   | wake_after_sleep_onset_hour |    |         |         |
| hourly_mean_rmssd   | total_nrem_time_hour        |    |         |         |
| hourly_mean_rmssd   | total_rem_time_hour         |    |         |         |
| hourly_mean_rmssd   | total_deep_nrem_time_hour   |    |         |         |
| hourly_mean_rmssd   | total_light_nrem_time_hour  |    |         |         |
| hourly_mean_rmssd   | hourly_mean_pulse_rate      |    |         |         |
| hourly_mean_rmssd   | hourly_mean_rmssd           |    | 0.98849 |         |
| hourly_mean_rmssd   | hourly_median_rmssd         | 32 | 4       | 3.6E-26 |
|                     |                             |    | 0.48637 | 0.00746 |
| hourly_mean_rmssd   | hourly_rmssd_variance       | 29 | 8       | 6       |
| hourly_median_rmssd | Semantic Fluency            |    |         |         |
| hourly_median_rmssd | MOCA                        |    |         |         |
| hourly_median_rmssd | Benton                      |    |         |         |
| hourly_median_rmssd | Letter Number Sequencing    |    |         |         |
| hourly_median_rmssd | HVLT Recall                 |    |         |         |
| hourly_median_rmssd | HVLT Recognition            |    |         |         |
| hourly_median_rmssd | HVLT Retention              |    |         |         |
| hourly_median_rmssd | Symbol Digit                |    |         |         |
| hourly_median_rmssd | STAI trait                  |    |         |         |
| hourly_median_rmssd | STAI state                  |    |         |         |
| hourly_median_rmssd | GDS                         |    |         |         |
| hourly_median_rmssd | QUIP                        |    |         |         |
| hourly_median_rmssd | ESS                         |    |         |         |
| hourly_median_rmssd | RBDSQ                       |    |         |         |
| hourly_median_rmssd | Systolic BP Drop            |    |         |         |
| hourly_median_rmssd | SCOPA autonome              |    |         |         |
| hourly_median_rmssd | Schwab England ADL          |    |         |         |
| hourly_median_rmssd | UPDRS I                     |    |         |         |
| hourly_median_rmssd | UPDRS II                    |    |         |         |
| hourly_median_rmssd | UPDRS III OFF               |    |         |         |
| hourly_median_rmssd | UPDRS III ON                |    |         |         |
| hourly_median_rmssd | UPDRS IV                    |    |         |         |
| hourly_median_rmssd | LEDD                        |    |         |         |
| hourly_median_rmssd | sum_walking_minutes         |    |         |         |
| hourly_median_rmssd | hourly_step_count_sum       |    |         |         |
| hourly_median_rmssd | sleep_efficiency            |    |         |         |
| hourly_median_rmssd | num_awakenings              |    |         |         |
| hourly_median_rmssd | total_sleep_time_hour       |    |         |         |
| hourly_median_rmssd | wake_after_sleep_onset_hour |    |         |         |

|                       |                             |    |         |         |
|-----------------------|-----------------------------|----|---------|---------|
| hourly_median_rmssd   | total_nrem_time_hour        |    |         |         |
| hourly_median_rmssd   | total_rem_time_hour         |    |         |         |
| hourly_median_rmssd   | total_deep_nrem_time_hour   |    |         |         |
| hourly_median_rmssd   | total_light_nrem_time_hour  |    |         |         |
| hourly_median_rmssd   | hourly_mean_pulse_rate      |    |         |         |
| hourly_median_rmssd   | hourly_mean_rmssd           |    |         |         |
| hourly_median_rmssd   | hourly_median_rmssd         |    | 0.49839 | 0.00592 |
| hourly_median_rmssd   | hourly_rmssd_variance       | 29 | 5       | 9       |
| hourly_rmssd_variance | Semantic Fluency            |    |         |         |
| hourly_rmssd_variance | MOCA                        |    |         |         |
| hourly_rmssd_variance | Benton                      |    |         |         |
| hourly_rmssd_variance | Letter Number Sequencing    |    |         |         |
| hourly_rmssd_variance | HVLT Recall                 |    |         |         |
| hourly_rmssd_variance | HVLT Recognition            |    |         |         |
| hourly_rmssd_variance | HVLT Retention              |    |         |         |
| hourly_rmssd_variance | Symbol Digit                |    |         |         |
| hourly_rmssd_variance | STAI trait                  |    |         |         |
| hourly_rmssd_variance | STAI state                  |    |         |         |
| hourly_rmssd_variance | GDS                         |    |         |         |
| hourly_rmssd_variance | QUIP                        |    |         |         |
| hourly_rmssd_variance | ESS                         |    |         |         |
| hourly_rmssd_variance | RBDSQ                       |    |         |         |
| hourly_rmssd_variance | Systolic BP Drop            |    |         |         |
| hourly_rmssd_variance | SCOPA autonome              |    |         |         |
| hourly_rmssd_variance | Schwab England ADL          |    |         |         |
| hourly_rmssd_variance | UPDRS I                     |    |         |         |
| hourly_rmssd_variance | UPDRS II                    |    |         |         |
| hourly_rmssd_variance | UPDRS III OFF               |    |         |         |
| hourly_rmssd_variance | UPDRS III ON                |    |         |         |
| hourly_rmssd_variance | UPDRS IV                    |    |         |         |
| hourly_rmssd_variance | LEDD                        |    |         |         |
| hourly_rmssd_variance | sum_walking_minutes         |    |         |         |
| hourly_rmssd_variance | hourly_step_count_sum       |    |         |         |
| hourly_rmssd_variance | sleep_efficiency            |    |         |         |
| hourly_rmssd_variance | num_awakenings              |    |         |         |
| hourly_rmssd_variance | total_sleep_time_hour       |    |         |         |
| hourly_rmssd_variance | wake_after_sleep_onset_hour |    |         |         |
| hourly_rmssd_variance | total_nrem_time_hour        |    |         |         |
| hourly_rmssd_variance | total_rem_time_hour         |    |         |         |
| hourly_rmssd_variance | total_deep_nrem_time_hour   |    |         |         |
| hourly_rmssd_variance | total_light_nrem_time_hour  |    |         |         |
| hourly_rmssd_variance | hourly_mean_pulse_rate      |    |         |         |
| hourly_rmssd_variance | hourly_mean_rmssd           |    |         |         |
| hourly_rmssd_variance | hourly_median_rmssd         |    |         |         |
| hourly_rmssd_variance | hourly_rmssd_variance       |    |         |         |

**Supplemental Table 6: Association between time progression over whole observation period**

Results of the Pearson correlation analysis between the progression markers of the clinical measures and the timeseries features of the digital measures. This analysis considers the whole observation timeframe. The Pearson's r coefficient, the associated p-value, and the sample size are displayed.

| clinical           | digital | pearson<br>r | p-value  | N   | sign |
|--------------------|---------|--------------|----------|-----|------|
| cognitive_slope_PC | PC_0    | 0.073888     | 0.397984 | 133 |      |
| cognitive_slope_PC | PC_1    | -0.11406     | 0.191133 | 133 |      |
| cognitive_slope_PC | PC_2    | -0.08416     | 0.335502 | 133 |      |
| cognitive_slope_PC | PC_3    | 0.071408     | 0.414052 | 133 |      |
| cognitive_slope_PC | PC_4    | 0.039295     | 0.653383 | 133 |      |
| cognitive_slope_PC | PC_5    | 0.137387     | 0.114806 | 133 |      |
| cognitive_slope_PC | PC_6    | -0.00807     | 0.926535 | 133 |      |
| cognitive_slope_PC | PC_7    | 0.050218     | 0.565938 | 133 |      |
| cognitive_slope_PC | PC_8    | 0.049587     | 0.570839 | 133 |      |
| cognitive_slope_PC | PC_9    | -0.02763     | 0.752222 | 133 |      |
| motor_slope_PC     | PC_0    | 0.014569     | 0.867808 | 133 |      |
| motor_slope_PC     | PC_1    | 0.067002     | 0.443516 | 133 |      |
| motor_slope_PC     | PC_2    | -0.12011     | 0.168494 | 133 |      |
| motor_slope_PC     | PC_3    | 0.071613     | 0.412706 | 133 |      |
| motor_slope_PC     | PC_4    | 0.159201     | 0.067196 | 133 |      |
| motor_slope_PC     | PC_5    | 0.263544     | 0.002177 | 133 | *    |
| motor_slope_PC     | PC_6    | 0.206735     | 0.016962 | 133 |      |
| motor_slope_PC     | PC_7    | 0.227411     | 0.008477 | 133 | *    |
| motor_slope_PC     | PC_8    | -0.04705     | 0.590707 | 133 |      |
| motor_slope_PC     | PC_9    | -0.0459      | 0.599842 | 133 |      |
| autonome_slope_PC  | PC_0    | 0.044563     | 0.607798 | 135 |      |
| autonome_slope_PC  | PC_1    | 0.055712     | 0.521008 | 135 |      |
| autonome_slope_PC  | PC_2    | 0.062071     | 0.474496 | 135 |      |
| autonome_slope_PC  | PC_3    | -0.10705     | 0.216536 | 135 |      |
| autonome_slope_PC  | PC_4    | 0.099087     | 0.252872 | 135 |      |
| autonome_slope_PC  | PC_5    | -0.1641      | 0.057195 | 135 |      |
| autonome_slope_PC  | PC_6    | 0.043707     | 0.614718 | 135 |      |
| autonome_slope_PC  | PC_7    | 0.217734     | 0.011186 | 135 |      |
| autonome_slope_PC  | PC_8    | 0.020598     | 0.812563 | 135 |      |
| autonome_slope_PC  | PC_9    | -0.22654     | 0.008239 | 135 | *    |
| daily_slope_PC     | PC_0    | -0.02267     | 0.794068 | 135 |      |
| daily_slope_PC     | PC_1    | 0.110305     | 0.202807 | 135 |      |
| daily_slope_PC     | PC_2    | -0.09819     | 0.257217 | 135 |      |



|                           |      |          |          |     |   |
|---------------------------|------|----------|----------|-----|---|
| daily_slope_PC            | PC_3 | 0.034222 | 0.69355  | 135 |   |
| daily_slope_PC            | PC_4 | 0.257954 | 0.002523 | 135 | * |
| daily_slope_PC            | PC_5 | 0.173094 | 0.044681 | 135 |   |
| daily_slope_PC            | PC_6 | 0.206027 | 0.016515 | 135 |   |
| daily_slope_PC            | PC_7 | 0.165651 | 0.054848 | 135 |   |
| daily_slope_PC            | PC_8 | -0.11961 | 0.167041 | 135 |   |
| daily_slope_PC            | PC_9 | -0.17325 | 0.044487 | 135 |   |
| neuropsychiatric_slope_PC | PC_0 | 0.060311 | 0.487135 | 135 |   |
| neuropsychiatric_slope_PC | PC_1 | 0.051679 | 0.551666 | 135 |   |
| neuropsychiatric_slope_PC | PC_2 | -0.08153 | 0.34719  | 135 |   |
| neuropsychiatric_slope_PC | PC_3 | -0.00226 | 0.979209 | 135 |   |
| neuropsychiatric_slope_PC | PC_4 | 0.209238 | 0.01487  | 135 |   |
| neuropsychiatric_slope_PC | PC_5 | 0.148555 | 0.085514 | 135 |   |
| neuropsychiatric_slope_PC | PC_6 | 0.184589 | 0.032094 | 135 |   |
| neuropsychiatric_slope_PC | PC_7 | 0.07275  | 0.40173  | 135 |   |
| neuropsychiatric_slope_PC | PC_8 | 0.060499 | 0.485782 | 135 |   |
| neuropsychiatric_slope_PC | PC_9 | -0.08387 | 0.333501 | 135 |   |
| medication_slope_PC       | PC_0 | -0.24964 | 0.004179 | 130 | * |
| medication_slope_PC       | PC_1 | -0.00281 | 0.974651 | 130 |   |
| medication_slope_PC       | PC_2 | -0.01422 | 0.872399 | 130 |   |
| medication_slope_PC       | PC_3 | -0.12259 | 0.16468  | 130 |   |
| medication_slope_PC       | PC_4 | 0.118107 | 0.180794 | 130 |   |
| medication_slope_PC       | PC_5 | -0.02314 | 0.793855 | 130 |   |
| medication_slope_PC       | PC_6 | -0.0268  | 0.762115 | 130 |   |
| medication_slope_PC       | PC_7 | 0.160939 | 0.067369 | 130 |   |
| medication_slope_PC       | PC_8 | 0.155    | 0.078263 | 130 |   |
| medication_slope_PC       | PC_9 | -0.05435 | 0.539125 | 130 |   |
